# Supplementary material for: The Set2/Rpd3S Pathway Suppresses Cryptic Transcription without Regard to Gene Length or Transcription Frequency
Source: PLoS One. 2009 Mar 19;4(3):e4886. doi: 10.1371/journal.pone.0004886 (PMC2654109; doi:10.1371/journal.pone.0004886)
Supplement: Table S1 — A table representing all detected transitions using a change point algorithm at two different cutoffs as described in the text. (0.47 MB XLS) [file pone.0004886.s001.xls]

## Sheet: supF Stat 9.0
Systematic Name	Standard Name	Chromosome	gstart	gend	gdir	pvalue	supF Stat	# of Probes	# of Transitions	Position (Probe Number)
YAL061W	BDH2	1	33449	34702	1	0	16.3634	88	3	23	43	60
YAL053W	FLC2	1	45900	48251	1	0	9.35497	117	1	73
YAL051W	OAF1	1	48565	51708	1	0	18.568	82	1	53
YAL043C	PTA1	1	58696	61053	0	0	17.7737	166	1	90
YAL035W	FUN12	1	76428	79436	1	0	13.6244	137	2	37	90
YAL029C	MYO4	1	87856	92271	0	0	14.0925	134	1	66
YAL026C	DRS2	1	95631	99698	0	0	12.1469	107	1	53
YAL024C	LTE1	1	101566	105873	0	0	9.60965	119	2	23	62
YAL017W	PSK1	1	120226	124296	1	0	12.4175	129	2	58	116
YAR019C	CDC15	1	172209	175133	0	0	10.7879	125	3	21	52	118
YAR050W	FLO1	1	203394	208007	1	0	21.6247	150	2	106	127
YBL101C	ECM21	2	24946	28299	0	0	29.6695	147	2	63	91
YBL088C	TEL1	2	51016	59379	0	0	15.1717	185	4	18	53	69	154
YBL079W	NUP170	2	75256	79764	1	0	15.9906	123	1	80
YBL076C	ILS1	2	81041	84259	0	0	12.8103	114	2	45	85
YBL066C	SEF1	2	96671	100117	0	0	20.0466	157	2	19	115
YBL037W	APL3	2	147212	150289	1	0	15.9377	97	1	42
YBL034C	STU1	2	153851	158392	0	0	16.6989	85	1	28
YBL022C	PIM1	2	177877	181278	0	0	12.7468	152	1	103
YBL017C	PEP1	2	186847	191586	0	0	28.679	169	2	43	82
YBL008W	HIR1	2	209656	212178	1	0	34.2622	94	1	55
YBL007C	SLA1	2	212635	216369	0	0	15.9615	186	2	55	121
YBL005W	PDR3	2	217473	220403	1	0	9.46898	75	2	29	43
YBL004W	UTP20	2	227639	235120	1	0	9.82747	146	2	20	94
YBR008C	FLR1	2	252564	254210	0	0	19.497	50	1	23
YBR023C	CHS3	2	284428	287925	0	0	13.535	126	2	27	70
YBR038W	CHS2	2	311897	314788	1	0	9.58108	104	1	79
YBR081C	SPT7	2	401247	405245	0	0	18.1438	107	2	55	87
YBR084W	MIS1	2	411048	413975	1	0	12.0804	151	2	60	135
YBR098W	MMS4	2	441509	443584	1	0	14.5919	56	1	36
YBR108W		2	454816	457659	1	0	18.209	150	5	12	53	78	103	114
YBR114W	RAD16	2	467242	469614	1	0	14.7114	117	2	54	76
YBR117C	TKL2	2	474386	476431	0	0	12.3257	117	2	26	69
YBR131W	CCZ1	2	497157	499271	1	0	15.06	66	2	36	50
YBR140C	IRA1	2	517344	526622	0	0	15.8844	208	3	25	71	160
YBR208C	DUR1,2	2	636698	642205	0	0	62.1102	277	3	97	113	151
YBR212W	NGR1	2	647881	649899	1	0	12.559	94	1	60
YBR218C	PYC2	2	658702	662244	0	0	24.0295	188	2	92	114
YBR235W		2	686896	690258	1	0	11.5092	123	2	48	83
YBR245C	ISW1	2	708145	711534	0	0	12.6271	108	1	46
YBR263W	SHM1	2	736259	737731	1	0	14.8392	86	1	36
YBR275C	RIF1	2	751351	757101	0	0	18.9433	143	1	78
YBR295W	PCA1	2	792843	796493	1	0	70.9089	194	3	32	110	127
YCL061C	MRC1	3	18816	22106	0	0	13.1182	104	2	74	92
YCL037C	SRO9	3	57374	58678	0	0	44.1024	92	1	36
YCL024W	KCC4	3	79162	82275	1	0	9.96824	123	2	8	58
YCL014W	BUD3	3	96281	101191	1	0	14.1883	139	2	92	111
YCR030C	SYP1	3	173822	176434	0	0	12.229	117	1	81
YCR032W	BPH1	3	179516	186019	1	0	9.33589	124	3	13	38	86
YCR033W	SNT1	3	186485	190165	1	0	22.0012	145	2	57	84
YCR048W	ARE1	3	211925	213757	1	0	17.4466	87	1	50
YCR067C	SED4	3	233121	236318	0	0	9.73103	144	2	22	100
YCR068W	ATG15	3	237210	238772	1	0	9.18916	115	1	66
YCR089W	FIG2	3	267431	272260	1	0	101.065	248	4	58	119	137	158
YDL231C	BRE4	4	38868	42245	0	0	17.9761	135	1	76
YDL195W	SEC31	4	107209	111030	1	0	34.8708	199	2	94	143
YDL190C	UFD2	4	118708	121593	0	0	24.9444	86	3	12	39	58
YDL185W	TFP1	4	126788	130003	1	0	14.6917	152	1	107
YDL171C	GLT1	4	149204	155641	0	0	17.8315	310	5	37	112	172	230	291
YDL154W	MSH5	4	178335	181040	1	0	27.9257	61	2	33	39
YDL149W	ATG9	4	184926	187919	1	0	24.6366	89	1	46
YDL145C	COP1	4	194572	198177	0	0	19.0754	158	3	26	82	143
YDL140C	RPO21	4	205361	210562	0	0	22.446	247	1	74
YDL117W	CYK3	4	248581	251238	1	0	12.3092	109	2	57	87
YDL112W	TRM3	4	258915	263225	1	0	10.7187	110	1	70
YDL102W	POL3	4	276872	280165	1	0	25.4858	97	1	65
YDL080C	THI3	4	310642	312471	0	0	11.773	102	1	23
YDL058W	USO1	4	345665	351037	1	0	15.9808	135	3	9	89	110
YDL038C		4	382327	384078	0	0	10.3267	124	2	30	74
YDL031W	DBP10	4	394214	397201	1	0	16.3961	109	1	77
YDL019C	OSH2	4	417660	421511	0	0	21.8918	178	3	37	91	141
YDR030C	RAD28	4	501750	503270	0	0	10.9778	41	1	28
YDR074W	TPS2	4	593890	596580	1	0	19.6938	100	3	12	35	70
YDR093W	DNF2	4	631279	636117	1	0	14.7662	210	3	19	97	137
YDR104C	SPO71	4	661170	664907	0	0	32.5094	110	1	56
YDR108W	GSG1	4	671266	673362	1	0	13.5943	72	1	52
YDR109C		4	673517	675664	0	0	10.5268	81	1	67
YDR122W	KIN1	4	694697	697891	1	0	17.4201	157	2	52	104
YDR127W	ARO1	4	704481	709247	1	0	19.6197	202	2	60	167
YDR128W		4	709546	712992	1	0	49.1932	111	2	55	75
YDR150W	NUM1	4	755625	763871	1	0	23.2022	202	2	71	128
YDR159W	SAC3	4	771874	775779	1	0	11.9309	85	1	56
YDR170C	SEC7	4	796190	802219	0	0	33.6252	200	2	53	115
YDR181C	SAS4	4	825907	827352	0	0	11.0659	52	1	12
YDR208W	MSS4	4	868221	870560	1	0	10.9878	82	2	24	54
YDR227W	SIR4	4	917567	921643	1	0	15.6756	119	2	49	92
YDR270W	CCC2	4	1005671	1008685	1	0	9.4376	93	2	34	58
YDR291W		4	1039724	1042957	1	0	12.6003	107	1	41
YDR293C	SSD1	4	1045636	1049388	0	0	22.1067	180	2	37	75
YDR312W	SSF2	4	1087578	1088939	1	0	10.6543	41	2	11	19
YDR338C		4	1147373	1149460	0	0	16.5519	93	1	33
YDR362C	TFC6	4	1196671	1198689	0	0	16.2917	79	1	34
YDR406W	PDR15	4	1279202	1283791	1	0	42.8172	216	3	18	120	173
YDR409W	SIZ1	4	1289398	1292112	1	0	33.8112	101	3	39	65	96
YDR420W	HKR1	4	1306259	1311667	1	0	28.8765	219	4	26	108	175	208
YDR443C	SSN2	4	1345668	1349930	0	0	29.3501	144	3	28	67	90
YDR457W	TOM1	4	1369782	1379588	1	0	34.3799	316	5	48	129	176	263	291
YDR464W	SPP41	4	1388864	1393171	1	0	18.6635	179	2	80	171
YDR475C	JIP4	4	1407456	1410086	0	0	12.3922	121	1	63
YDR485C	VPS72	4	1424812	1427199	0	0	20.2759	96	2	49	61
YDR507C	GIN4	4	1462350	1465778	0	0	10.1653	104	2	46	82
YDR520C	URC2	4	1481077	1483395	0	0	36.1097	58	1	14
YEL043W		5	70478	73348	1	0	19.7159	147	2	55	72
YEL032W	MCM3	5	86937	89852	1	0	26.0842	171	2	78	91
YEL031W	SPF1	5	90258	93905	1	0	15.8696	141	2	49	89
YEL022W	GEA2	5	111421	115800	1	0	9.42064	100	1	39
YEL011W	GLC3	5	133120	135234	1	0	16.4172	104	2	11	42
YER013W	PRP22	5	178840	182277	1	0	9.90262	116	1	55
YER019W	ISC1	5	192796	194229	1	0	10.5351	91	1	6
YER033C	ZRG8	5	218056	221286	0	0	9.14878	115	1	68
YER070W	RNR1	5	298948	301614	1	0	13.9403	141	2	39	77
YER075C	PTP3	5	308409	311195	0	0	14.2082	94	2	54	84
YER088C	DOT6	5	333172	335184	0	0	12.2087	126	2	62	108
YER093C	TSC11	5	343316	347608	0	0	33.6465	114	2	50	64
YER098W	UBP9	5	355462	357726	1	0	10.6161	56	1	39
YER129W	SAK1	5	417277	420705	1	0	15.7354	126	1	59
YER155C	BEM2	5	476340	482843	0	0	27.5486	155	2	57	96
YER162C	RAD4	5	500625	502889	0	0	9.734	94	2	37	78
YER164W	CHD1	5	505387	509793	1	0	27.3843	180	2	87	135
YER166W	DNF1	5	512739	517454	1	0	21.4476	174	3	31	76	150
YFL054C		6	20847	22787	0	0	13.2773	108	2	10	56
YFL042C		6	45720	47744	0	0	41.5832	109	3	31	41	66
YFL034W		6	65475	68696	1	0	49.8484	139	3	70	82	114
YFL033C	RIM15	6	69113	74425	0	0	23.2017	254	2	115	207
YFL007W	BLM10	6	123474	129905	1	0	37.5196	216	3	87	115	170
YFR015C	GSY1	6	174257	176383	0	0	21.4849	112	2	62	103
YFR016C		6	177034	180735	0	0	11.814	144	2	31	63
YFR019W	FAB1	6	184490	191326	1	0	23.5184	209	3	65	131	180
YFR029W	PTR3	6	210925	212961	1	0	10.1808	117	1	69
YFR030W	MET10	6	213300	216407	1	0	11.0737	135	2	8	109
YFR031C	SMC2	6	216582	220094	0	0	15.0113	95	1	60
YGL216W	KIP3	7	84884	87301	1	0	12.7932	104	1	71
YGL206C	CHC1	7	102547	107508	0	0	15.2375	150	2	18	55
YGL201C	MCM6	7	117858	120911	0	0	11.9558	137	2	24	62
YGL197W	MDS3	7	124703	129166	1	0	24.4195	198	4	60	77	126	172
YGL195W	GCN1	7	131531	139549	1	0	39.5555	296	3	108	182	239
YGL173C	KEM1	7	175533	180119	0	0	16.5277	140	2	43	81
YGL163C	RAD54	7	193713	196409	0	0	12.1831	109	2	20	72
YGL142C	GPI10	7	236274	238124	0	0	29.7538	56	1	26
YGL141W	HUL5	7	238358	241090	1	0	29.4964	64	2	41	48
YGL140C		7	241358	245017	0	0	17.8108	132	2	32	85
YGL139W	FLC3	7	245721	248129	1	0	12.9749	96	1	62
YGL137W	SEC27	7	249874	252743	1	0	13.251	126	4	8	36	64	108
YGL133W	ITC1	7	257712	261506	1	0	14.1834	122	3	22	57	85
YGL114W		7	293463	295640	1	0	29.9972	101	2	55	66
YGL092W	NUP145	7	337909	341862	1	0	10.0315	115	1	63
YGL062W	PYC1	7	385199	388735	1	0	15.0852	168	1	83
YGL045W	RIM8	7	414106	415734	1	0	20.0368	65	2	36	45
YGL023C	PIB2	7	450202	452109	0	0	9.55597	110	1	33
YGL013C	PDR1	7	469097	472303	0	0	15.0755	100	1	36
YGL008C	PMA1	7	479915	482671	0	0	15.6306	182	2	75	166
YGL006W	PMC1	7	485925	489446	1	0	23.0535	118	2	53	109
YGR013W	SNU71	7	514558	516420	1	0	10.613	85	1	28
YGR014W	MSB2	7	516947	520867	1	0	15.84	255	2	79	173
YGR032W	GSC2	7	548268	553955	1	0	25.842	210	3	23	111	175
YGR047C	TFC4	7	586396	589473	0	0	9.86647	95	1	46
YGR061C	ADE6	7	611893	615969	0	0	18.3732	197	2	57	114
YGR094W	VAS1	7	672190	675504	1	0	9.65767	133	1	50
YGR097W	ASK10	7	678699	682139	1	0	26.5832	163	3	60	104	131
YGR098C	ESP1	7	682570	687462	0	0	12.3891	76	2	21	52
YGR100W	MDR1	7	690249	693101	1	0	16.4215	110	2	52	91
YGR134W	CAF130	7	757775	761143	1	0	11.8779	110	1	28
YGR144W	THI4	7	780404	781384	1	0	10.7808	74	1	34
YGR184C	UBR1	7	859906	865758	0	0	13.4533	124	1	78
YGR188C	BUB1	7	872049	875114	0	0	17.1892	89	2	25	41
YGR196C	FYV8	7	889738	892191	0	0	29.5148	101	2	22	60
YGR204W	ADE3	7	905939	908779	1	0	21.9717	220	1	116
YGR217W	CCH1	7	924699	930818	1	0	35.1312	166	3	18	49	89
YGR238C	KEL2	7	966044	968692	0	0	15.6493	88	1	23
YGR246C	BRF1	7	982487	984277	0	0	12.9913	80	1	32
YGR256W	GND2	7	1004630	1006108	1	0	11.0378	83	1	40
YGR258C	RAD2	7	1007677	1010772	0	0	9.57325	142	2	19	120
YGR271W	SLH1	7	1031797	1037700	1	0	17.9477	165	4	20	46	102	138
YGR281W	YOR1	7	1052830	1057263	1	0	10.8689	140	2	28	79
YGR289C	MAL11	7	1073969	1075819	0	0	20.2432	77	2	43	54
YHL035C	VMR1	8	27976	32754	0	0	13.9286	129	1	59
YHL032C	GUT1	8	36377	38506	0	0	9.85871	125	1	33
YHL030W	ECM29	8	40082	45688	1	0	15.9985	177	1	96
YHR082C	KSP1	8	268461	271550	0	0	10.8248	89	1	62
YHR099W	TRA1	8	302764	313998	1	0	18.412	281	4	42	92	189	246
YHR102W	KIC1	8	316575	319817	1	0	15.5394	158	3	27	47	146
YHR149C	SKG6	8	394458	396662	0	0	20.1452	122	1	63
YHR158C	KEL1	8	413688	417182	0	0	13.9339	137	2	15	73
YHR164C	DNA2	8	424612	429180	0	0	39.4068	147	4	26	55	79	112
YHR165C	PRP8	8	429709	436950	0	0	30.5693	230	3	97	129	195
YHR182W		8	468219	470576	1	0	12.2308	66	1	37
YHR186C	KOG1	8	475999	480672	0	0	12.1895	185	3	38	119	170
YHR204W	MNL1	8	506319	508709	1	0	12.4524	108	1	51
YHR211W	FLO5	8	525392	528619	1	0	11.9862	152	2	43	134
YIL169C		9	23119	26106	0	0	36.074	195	2	113	153
YIL156W	UBP7	9	48091	51306	1	0	17.0592	137	2	88	122
YIL147C	SLN1	9	69791	73453	0	0	19.8836	144	2	58	92
YIL129C	TAO3	9	106107	113237	0	0	38.5508	216	3	54	114	147
YIL112W	HOS4	9	151592	154843	1	0	21.5868	121	3	23	86	104
YIL095W	PRK1	9	183934	186366	1	0	11.3926	73	1	26
YIL075C	RPN2	9	217860	220697	0	0	9.48959	121	2	24	105
YIL068C	SEC6	9	233054	235471	0	0	10.7031	54	1	29
YIL048W	NEO1	9	261436	264891	1	0	14.0543	86	1	52
YIL046W	MET30	9	268650	270572	1	0	12.6765	139	1	13
YIL031W	ULP2	9	292632	295736	1	0	15.5471	64	1	29
YIL026C	IRR1	9	304475	307927	0	0	12.0812	98	2	22	71
YIL013C	PDR11	9	328205	332440	0	0	18.8213	172	2	41	129
YIR007W		9	370701	372995	1	0	17.9421	92	1	61
YJL212C	OPT1	10	33850	36249	0	0	18.0339	116	2	40	62
YJL206C		10	47659	49935	0	0	24.2086	71	1	22
YJL198W	PHO90	10	60843	63488	1	0	15.3431	124	2	32	73
YJL197W	UBP12	10	63804	67568	1	0	23.6874	116	1	60
YJL165C	HAL5	10	106888	109455	0	0	9.79887	106	1	64
YJL146W	IDS2	10	143289	144698	1	0	9.62387	52	1	42
YJL134W	LCB3	10	158185	159414	1	0	9.88336	61	1	54
YJL130C	URA2	10	165720	172364	0	0	14.1455	291	3	52	169	241
YJL129C	TRK1	10	173596	177303	0	0	20.3813	151	2	19	81
YJL102W	MEF2	10	231297	233756	1	0	11.9248	81	2	28	74
YJL101C	GSH1	10	234316	236352	0	0	9.86653	103	1	94
YJL095W	BCK1	10	247250	251686	1	0	10.964	172	1	43
YJL080C	SCP160	10	285553	289221	0	0	13.7563	122	1	70
YJL078C	PRY3	10	291331	293976	0	0	15.424	191	3	72	171	181
YJL076W	NET1	10	295240	298809	1	0	10.9932	148	2	53	102
YJL074C	SMC3	10	299152	302844	0	0	9.0792	80	2	23	73
YJL071W	ARG2	10	306127	307851	1	0	44.361	61	1	53
YJL042W	MHP1	10	361244	365440	1	0	17.8506	197	1	135
YJL020C	BBC1	10	398932	402405	0	0	18.0134	174	2	56	98
YJL005W	CYR1	10	425151	431231	1	0	46.0562	216	2	73	124
YJR004C	SAG1	10	442902	444854	0	0	91.7618	72	2	56	68
YJR015W		10	462714	464246	1	0	9.433	68	2	14	63
YJR032W	CPR7	10	491074	492255	1	0	9.591	25	1	23
YJR035W	RAD26	10	497348	500605	1	0	24.9781	93	1	47
YJR036C	HUL4	10	500706	503384	0	0	12.3416	49	1	21
YJR039W		10	503929	507294	1	0	9.06132	93	1	49
YJR049C	UTR1	10	526877	528469	0	0	34.2483	69	1	53
YJR065C	ARP3	10	557802	559151	0	0	12.0704	67	1	60
YJR066W	TOR1	10	559409	566821	1	0	16.802	270	3	48	141	251
YJR072C	NPA3	10	570960	572117	0	0	11.5119	68	1	62
YJR084W	CSN12	10	583726	584997	1	0	12.7244	61	1	49
YJR105W	ADO1	10	623573	624595	1	0	41.9868	60	1	53
YJR109C	CPA2	10	629579	632935	0	0	15.6524	128	2	27	55
YJR127C	RSF2	10	658911	663053	0	0	12.6292	169	2	23	49
YJR137C	ECM17	10	678951	683279	0	0	31.7983	157	3	73	93	146
YJR140C	HIR3	10	690744	695690	0	0	10.3324	113	1	45
YJR151C	DAN4	10	712249	715734	0	0	18.2369	190	3	33	81	157
YJR152W	DAL5	10	719660	721291	1	0	12.3422	67	1	57
YKL220C	FRE2	11	9092	11227	0	0	18.1223	83	2	47	67
YKL217W	JEN1	11	22234	24084	1	0	22.5514	97	1	67
YKL215C		11	26828	30688	0	0	32.9603	146	2	38	62
YKL209C	STE6	11	42424	46296	0	0	27.6571	129	1	55
YKL203C	TOR2	11	55936	63360	0	0	19.1899	244	3	44	86	155
YKL188C	PXA2	11	86230	88791	0	0	17.1633	59	1	45
YKL187C		11	89289	91541	0	0	20.4852	141	2	90	117
YKL182W	FAS1	11	100676	106831	1	0	10.6622	296	3	39	134	206
YKL171W		11	127480	130266	1	0	12.6193	124	2	41	103
YKL168C	KKQ8	11	131293	133467	0	0	11.7806	100	1	35
YKL129C	MYO3	11	196348	200163	0	0	38.1689	155	2	70	86
YKL105C		11	238829	242227	0	0	14.8311	166	2	45	125
YKL101W	HSL1	11	248564	253120	1	0	9.94948	152	1	105
YKL092C	BUD2	11	265789	269103	0	0	10.1449	60	1	29
YKL064W	MNR2	11	317408	320317	1	0	9.13164	124	3	17	42	94
YKL050C		11	342496	345264	0	0	18.5521	143	3	28	81	128
YKL038W	RGT1	11	365248	368760	1	0	9.42697	171	2	32	97
YKL020C	SPT23	11	398475	401723	0	0	10.0843	121	1	79
YKL010C	UFD4	11	421067	425518	0	0	12.9666	139	2	22	62
YKR019C	IRS4	11	475859	477706	0	0	9.04174	118	1	102
YKR031C	SPO14	11	500986	506037	0	0	18.697	148	2	12	91
YKR050W	TRK2	11	527457	530126	1	0	18.3236	153	1	99
YKR054C	DYN1	11	535289	547567	0	0	16.1433	315	3	70	212	292
YKR063C	LAS1	11	560431	561939	0	0	10.3539	53	2	10	27
YKR095W	MLP1	11	619447	625074	1	0	10.4284	84	1	41
YLL048C	YBT1	12	41279	46264	0	0	12.0178	147	2	49	99
YLL040C	VPS13	12	54210	63644	0	0	41.4152	265	4	34	79	119	178
YLL028W	TPO1	12	84803	86563	1	0	9.20932	106	3	17	60	100
YLL021W	SPA2	12	100946	105346	1	0	14.6336	210	3	61	90	147
YLL019C	KNS1	12	105685	107898	0	0	11.6406	95	2	36	81
YLL015W	BPT1	12	116431	121110	1	0	10.0917	124	2	32	81
YLR006C	SSK1	12	161754	163892	0	0	13.0488	95	1	49
YLR014C	PPR1	12	172267	174981	0	0	9.66146	91	1	59
YLR024C	UBR2	12	187664	193282	0	0	10.4037	117	1	78
YLR032W	RAD5	12	204992	208501	1	0	10.4024	101	3	42	59	90
YLR087C	CSF1	12	306856	315732	0	0	35.8093	255	3	50	157	176
YLR096W	KIN2	12	332591	336034	1	0	12.9011	141	2	57	118
YLR106C	MDN1	12	349007	363739	0	0	27.7013	450	8	74	122	147	226	295	320	395	418
YLR120C	YPS1	12	386512	388221	0	0	10.7425	89	2	42	66
YLR127C	APC2	12	395759	398320	0	0	11.463	58	1	27
YLR134W	PDC5	12	410724	412415	1	0	12.3287	100	1	59
YLR135W	SLX4	12	413282	415528	1	0	9.00317	76	1	34
YLR187W	SKG3	12	524867	527947	1	0	32.3062	137	3	37	59	97
YLR234W	TOP3	12	609785	611755	1	0	20.1692	121	2	43	63
YLR249W	YEF3	12	636782	639916	1	0	9.27454	189	2	38	114
YLR256W	HAP1	12	646417	650925	1	0	20.0396	198	2	74	141
YLR258W	GSY2	12	660718	662835	1	0	9.17454	100	2	20	51
YLR272C	YCS4	12	683674	687204	0	0	13.0004	88	1	28
YLR278C		12	700001	704026	0	0	121.218	181	5	44	66	96	131	172
YLR305C	STT4	12	738163	743865	0	0	9.00053	168	2	24	126
YLR320W	MMS22	12	771940	776304	1	0	26.9051	109	2	32	66
YLR337C	VRP1	12	802653	805106	0	0	21.0907	122	2	54	75
YLR342W	FKS1	12	809997	815627	1	0	15.8174	225	3	51	116	157
YLR352W		12	831115	833538	1	0	17.2857	72	1	33
YLR362W	STE11	12	849865	852018	1	0	9.02538	60	1	37
YLR371W	ROM2	12	862713	866783	1	0	37.4504	172	2	104	115
YLR373C	VID22	12	868661	871366	0	0	16.8225	92	1	24
YLR384C	IKI3	12	888851	892900	0	0	12.4327	173	1	90
YLR386W	VAC14	12	893628	896270	1	0	16.267	83	1	72
YLR389C	STE23	12	899577	902660	0	0	15.9829	114	1	33
YLR422W		12	965894	971692	1	0	9.89475	181	3	66	91	142
YLR430W	SEN1	12	993431	1000126	1	0	28.1785	223	3	26	106	162
YLR436C	ECM30	12	1007418	1011242	0	0	13.1653	121	1	49
YLR442C	SIR3	12	1019312	1022248	0	0	17.7062	77	2	27	40
YLR450W	HMG2	12	1032624	1035761	1	0	9.13139	107	2	36	70
YLR454W		12	1043996	1051882	1	0	13.8153	117	2	33	83
YML117W	NAB6	13	34243	37647	1	0	20.4716	119	2	41	67
YML109W	ZDS2	13	51640	54468	1	0	13.7785	129	2	58	104
YML100W	TSL1	13	70624	73920	1	0	21.4198	184	3	25	51	105
YML072C	TCB3	13	124730	129367	0	0	45.7453	172	3	56	79	111
YML065W	ORC1	13	142210	144954	1	0	11.5642	76	1	49
YML061C	PIF1	13	148953	151532	0	0	23.8222	94	2	33	65
YML059C	NTE1	13	153219	158258	0	0	27.0684	232	3	18	60	121
YML054C	CYB2	13	165533	167308	0	0	14.0748	89	2	27	56
YML029W	USA1	13	217362	219878	1	0	12.9801	113	1	55
YML023C	NSE5	13	226994	228664	0	0	9.39209	53	1	39
YML002W		13	264541	266754	1	0	9.4154	37	1	17
YMR012W	CLU1	13	291133	294966	1	0	10.5481	100	2	39	75
YMR047C	NUP116	13	363363	366704	0	0	13.3363	170	2	63	151
YMR054W	STV1	13	383302	385974	1	0	13.946	120	2	34	66
YMR076C	PDS5	13	416195	420028	0	0	14.5491	64	1	23
YMR102C		13	469847	472351	0	0	10.8281	125	2	46	95
YMR109W	MYO5	13	486586	490245	1	0	10.2559	132	2	40	88
YMR128W	ECM16	13	523695	527498	1	0	14.0612	126	3	21	68	82
YMR162C	DNF3	13	578950	583920	0	0	9.06164	176	3	68	102	153
YMR176W	ECM5	13	611739	615974	1	0	17.3844	95	1	27
YMR189W	GCV2	13	637499	640603	1	0	13.1659	136	2	44	78
YMR219W	ESC1	13	707132	712108	1	0	23.54	190	2	97	152
YMR247C	RKR1	13	763350	768038	0	0	12.2494	82	2	34	54
YMR261C	TPS3	13	790204	793368	0	0	18.3651	137	3	44	62	120
YMR304W	UBP15	13	874986	878678	1	0	19.0268	136	3	61	85	121
YMR306W	FKS3	13	881158	886515	1	0	22.4122	171	1	118
YMR308C	PSE1	13	888951	892220	0	0	9.27217	129	2	43	84
YNL327W	EGT2	14	24047	27172	1	0	12.7347	160	3	38	99	148
YNL321W	VNX1	14	34695	37421	1	0	9.63017	154	1	113
YNL278W	CAF120	14	113271	116453	1	0	14.7139	138	2	33	82
YNL273W	TOF1	14	122883	126599	1	0	35.1371	103	1	51
YNL271C	BNI1	14	129523	135384	0	0	11.6872	216	1	67
YNL262W	POL2	14	148213	154881	1	0	40.7726	205	6	12	48	80	117	136	174
YNL250W	RAD50	14	175411	179349	1	0	14.0858	63	1	47
YNL243W	SLA2	14	188052	190958	1	0	25.7727	203	1	100
YNL242W	ATG2	14	191325	196103	1	0	19.6261	137	2	40	89
YNL192W	CHS1	14	276503	279898	1	0	15.0862	89	2	50	72
YNL172W	APC1	14	310638	315884	1	0	23.9841	170	4	41	87	114	157
YNL163C	RIA1	14	326743	330075	0	0	21.3392	130	1	81
YNL124W	NAF1	14	392894	394372	1	0	10.8841	96	2	16	67
YNL106C	INP52	14	420946	424497	0	0	13.6677	134	1	58
YNL102W	POL1	14	430089	434495	1	0	15.8122	139	2	56	95
YNL095C		14	444914	446842	0	0	10.7696	102	1	68
YNL091W	NST1	14	452410	456132	1	0	38.1885	147	1	64
YNL034W		14	570478	572316	1	0	43.428	74	1	46
YNL020C	ARK1	14	595624	597540	0	0	10.8607	78	2	10	45
YNL018C		14	599937	601775	0	0	32.0426	80	1	37
YNL014W	HEF3	14	606320	609454	1	0	9.62553	136	1	64
YNR011C	PRP2	14	644322	646952	0	0	64.2399	88	2	34	41
YNR013C	PHO91	14	649030	651714	0	0	27.2123	157	2	51	76
YNR031C	SSK2	14	680696	685435	0	0	10.7722	152	2	45	120
YNR065C		14	750350	753700	0	0	16.9208	96	2	23	49
YNR067C	DSE4	14	755746	759099	0	0	10.9935	122	2	59	116
YNR070W		14	765375	769376	1	0	21.8103	180	3	40	88	169
YOL155C	HPF1	15	28702	31605	0	0	19.5934	190	3	15	90	152
YOL138C		15	61325	65350	0	0	24.0567	165	1	75
YOL098C		15	132725	135838	0	0	17.1914	97	2	36	51
YOL087C		15	155287	158637	0	0	15.8293	131	2	49	79
YOL084W	PHM7	15	162356	165331	1	0	11.937	171	2	17	79
YOL081W	IRA2	15	171070	180309	1	0	29.1344	255	5	68	107	125	174	227
YOL078W	AVO1	15	181682	185212	1	0	20.8884	113	1	25
YOL075C		15	189658	193542	0	0	15.6404	117	2	54	110
YOL055C	THI20	15	224419	226074	0	0	22.5393	75	1	49
YOL004W	SIN3	15	316939	321549	1	0	11.7301	181	2	40	126
YOR011W	AUS1	15	349679	353863	1	0	11.9098	145	2	54	118
YOR086C	TCB1	15	483221	486781	0	0	22.4209	114	2	43	64
YOR093C		15	497507	502453	0	0	15.4672	89	1	60
YOR109W	INP53	15	525279	528602	1	0	10.5237	112	1	46
YOR129C	AFI1	15	566878	569559	0	0	9.25812	81	1	32
YOR138C	RUP1	15	584310	586325	0	0	26.147	143	1	68
YOR140W	SFL1	15	586982	589282	1	0	13.7326	101	2	21	36
YOR153W	PDR5	15	619841	624376	1	0	9.64284	170	1	66
YOR156C	NFI1	15	628361	630541	0	0	12.886	83	2	11	34
YOR188W	MSB1	15	685768	689181	1	0	13.7668	129	1	52
YOR191W	ULS1	15	692476	697335	1	0	18.5677	169	2	82	136
YOR207C	RET1	15	730009	733458	0	0	18.8867	110	1	61
YOR227W	HER1	15	762826	766566	1	0	13.7961	113	2	68	83
YOR270C	VPH1	15	828051	830573	0	0	10.4081	100	1	43
YOR273C	TPO4	15	834451	836430	0	0	9.2528	83	2	25	57
YOR291W		15	861174	865592	1	0	12.601	147	2	100	124
YOR326W	MYO2	15	925718	930442	1	0	27.1171	147	2	82	107
YOR328W	PDR10	15	931800	936494	1	0	29.0964	246	6	19	43	122	141	191	211
YOR329C	SCD5	15	936728	939346	0	0	25.4672	124	3	14	69	85
YOR341W	RPA190	15	960984	965978	1	0	13.3834	201	2	53	114
YOR348C	PUT4	15	986896	988779	0	0	11.8642	115	2	46	81
YOR363C	PIP2	15	1020220	1023210	0	0	16.4902	82	3	14	27	43
YOR381W	FRE3	15	1055543	1057678	1	0	13.9008	97	2	17	35
YPL231W	FAS2	16	108652	114315	1	0	44.2703	297	3	47	157	216
YPL226W	NEW1	16	121767	125357	1	0	12.0238	131	1	69
YPL221W	FLC1	16	133042	135423	1	0	9.55343	131	2	33	68
YPL176C	TRE1	16	216011	218362	0	0	10.7338	109	2	24	54
YPL167C	REV3	16	232592	237106	0	0	16.8664	106	1	58
YPL147W	PXA1	16	273254	275866	1	0	11.9037	74	1	32
YPL115C	BEM3	16	332099	335485	0	0	9.79336	98	1	55
YPL110C	GDE1	16	341067	344738	0	0	17.6823	116	3	70	87	103
YPL105C	SYH1	16	352860	355409	0	0	15.2026	105	2	41	59
YPL104W	MSD1	16	355697	357673	1	0	9.57438	74	2	44	59
YPL085W	SEC16	16	387064	393651	1	0	22.9828	302	4	113	154	222	276
YPL058C	PDR12	16	445839	450374	0	0	25.246	198	2	65	133
YPL045W	VPS16	16	467257	469653	1	0	9.24992	55	1	31
YPL036W	PMA2	16	482841	485684	1	0	14.9418	141	1	115
YPL009C		16	535817	538933	0	0	14.0233	80	1	34
YPL006W	NCR1	16	544628	548140	1	0	18.9589	110	3	33	55	89
YPR003C		16	561501	563765	0	0	11.8014	85	1	40
YPR010C	RPA135	16	577582	581193	0	0	25.0955	159	2	67	106
YPR019W	MCM4	16	596747	599548	1	0	14.9825	112	1	66
YPR026W	ATH1	16	615376	619011	1	0	14.8705	116	1	52
YPR028W	YOP1	16	623524	624199	1	0	10.9393	26	1	9
YPR049C	ATG11	16	661134	664670	0	0	12.2065	82	2	25	42
YPR074C	TKL1	16	692793	694835	0	0	14.2437	151	2	77	103
YPR081C	GRS2	16	702112	703968	0	0	15.5774	69	1	53
YPR095C	SYT1	16	721035	724715	0	0	16.9088	124	1	56
YPR104C	FHL1	16	733621	736431	0	0	12.239	124	1	85
YPR105C	COG4	16	736982	739567	0	0	10.5422	63	1	28
YPR111W	DBF20	16	747304	748998	1	0	19.5445	59	1	48
YPR115W		16	754875	758126	1	0	26.3782	141	2	40	84
YPR117W		16	760023	767492	1	0	12.7542	174	3	46	75	93
YPR120C	CLB5	16	773873	775180	0	0	20.2768	46	1	18
YPR121W	THI22	16	778579	780297	1	0	14.2463	91	2	38	63
YPR135W	CTF4	16	799230	802013	1	0	14.5782	94	1	44
YPR156C	TPO3	16	837905	839773	0	0	10.7595	55	1	27
YPR184W	GDB1	16	902040	906650	1	0	25.5203	231	2	27	142

## Sheet: supF Stat 3.0
Systematic Name	Standard Name	Chromosome	gstart	gend	gdir	pvalue	supF Stat	# of Probes	# of Transitions	Position (Probe Number)
YAL063C	FLO9	1	24001	27969	0	0	4.48428	86	1	23
YAL061W	BDH2	1	33449	34702	1	0	16.3634	88	3	23	43	60
YAL056W	GPB2	1	39260	41902	1	0	4.77886	91	1	52
YAL053W	FLC2	1	45900	48251	1	0	9.35497	117	1	73
YAL051W	OAF1	1	48565	51708	1	0	18.568	82	1	53
YAL048C	GEM1	1	52802	54790	0	0	3.14864	87	1	24
YAL043C	PTA1	1	58696	61053	0	0	17.7737	166	1	90
YAL038W	CDC19	1	71787	73289	1	0	3.32703	116	1	86
YAL035W	FUN12	1	76428	79436	1	0	13.6244	137	2	37	90
YAL029C	MYO4	1	87856	92271	0	0	14.0925	134	1	66
YAL026C	DRS2	1	95631	99698	0	0	12.1469	107	1	53
YAL024C	LTE1	1	101566	105873	0	0	9.60965	119	2	23	62
YAL023C	PMT2	1	106273	108552	0	0	7.13042	127	1	87
YAL019W	FUN30	1	114920	118315	1	0	3.976	145	1	119
YAL017W	PSK1	1	120226	124296	1	0	12.4175	129	2	58	116
YAL005C	SSA1	1	139505	141433	0	0	6.39873	53	1	17
YAL002W	VPS8	1	143709	147533	1	0	4.43876	93	1	49
YAL001C	TFC3	1	147596	151168	0	0	6.40784	88	1	41
YAR007C	RFA1	1	156756	158621	0	0	3.03716	76	1	19
YAR019C	CDC15	1	172209	175133	0	0	10.7879	125	3	21	52	118
YAR042W	SWH1	1	192613	196179	1	0	7.05112	181	3	16	74	127
YAR050W	FLO1	1	203394	208007	1	0	21.6247	150	2	106	127
YBL106C	SRO77	2	10847	13879	0	0	6.38831	112	1	50
YBL105C	PKC1	2	14241	17696	0	0	5.44044	130	1	61
YBL103C	RTG3	2	22075	23535	0	0	8.12332	67	1	28
YBL101C	ECM21	2	24946	28299	0	0	29.6695	147	2	63	91
YBL097W	BRN1	2	40828	43092	1	0	5.52946	72	1	22
YBL088C	TEL1	2	51016	59379	0	0	15.1717	185	4	18	53	69	154
YBL085W	BOI1	2	63873	66815	1	0	5.82126	126	2	38	109
YBL079W	NUP170	2	75256	79764	1	0	15.9906	123	1	80
YBL076C	ILS1	2	81041	84259	0	0	12.8103	114	2	45	85
YBL066C	SEF1	2	96671	100117	0	0	20.0466	157	2	19	115
YBL060W	YEL1	2	107934	109997	1	0	3.06204	48	2	19	44
YBL042C	FUI1	2	138344	140263	0	0	5.17337	96	1	63
YBL039C	URA7	2	143992	145731	0	0	3.77133	66	1	34
YBL037W	APL3	2	147212	150289	1	0	15.9377	97	1	42
YBL035C	POL12	2	151496	153613	0	0	7.31003	69	1	27
YBL034C	STU1	2	153851	158392	0	0	16.6989	85	1	28
YBL029W		2	166137	167267	1	0	3.71001	37	1	23
YBL027W	RPL19B	2	168426	169379	1	0	4.29455	51	1	10
YBL022C	PIM1	2	177877	181278	0	0	12.7468	152	1	103
YBL017C	PEP1	2	186847	191586	0	0	28.679	169	2	43	82
YBL014C	RRN6	2	199067	201751	0	0	3.76617	95	1	54
YBL011W	SCT1	2	203541	205820	1	0	7.39929	102	1	48
YBL010C		2	206110	206952	0	0	3.10534	33	1	27
YBL008W	HIR1	2	209656	212178	1	0	34.2622	94	1	55
YBL007C	SLA1	2	212635	216369	0	0	15.9615	186	2	55	121
YBL005W	PDR3	2	217473	220403	1	0	9.46898	75	2	29	43
YBL004W	UTP20	2	227639	235120	1	0	9.82747	146	2	20	94
YBR001C	NTH2	2	238943	241285	0	0	3.4806	99	1	89
YBR007C	DSF2	2	248807	251017	0	0	5.33291	72	1	50
YBR008C	FLR1	2	252564	254210	0	0	19.497	50	1	23
YBR015C	MNN2	2	267710	269503	0	0	3.17799	84	1	48
YBR017C	KAP104	2	270947	273703	0	0	4.89401	112	1	46
YBR023C	CHS3	2	284428	287925	0	0	13.535	126	2	27	70
YBR033W	EDS1	2	301944	304703	1	0	7.90059	102	2	44	85
YBR038W	CHS2	2	311897	314788	1	0	9.58108	104	1	79
YBR049C	REB1	2	334384	336816	0	0	3.9645	108	1	66
YBR055C	PRP6	2	344600	347299	0	0	4.68614	67	1	28
YBR057C	MUM2	2	352191	353291	0	0	4.69438	32	1	15
YBR059C	AKL1	2	356859	360185	0	0	8.12679	170	3	57	137	161
YBR072W	HSP26	2	382027	382671	1	0	3.24167	44	1	4
YBR074W		2	386281	389211	1	0	4.60225	100	1	34
YBR079C	RPG1	2	395377	398271	0	0	6.18822	113	2	46	83
YBR080C	SEC18	2	398608	400884	0	0	3.94928	62	1	22
YBR081C	SPT7	2	401247	405245	0	0	18.1438	107	2	55	87
YBR084W	MIS1	2	411048	413975	1	0	12.0804	151	2	60	135
YBR084C-A	RPL19A	2	414180	415255	0	0	3.69829	36	1	29
YBR086C	IST2	2	420195	423035	0	0	5.06988	88	2	33	79
YBR097W	VPS15	2	436945	441309	1	0	3.44132	59	1	23
YBR098W	MMS4	2	441509	443584	1	0	14.5919	56	1	36
YBR108W		2	454816	457659	1	0	18.209	150	5	12	53	78	103	114
YBR114W	RAD16	2	467242	469614	1	0	14.7114	117	2	54	76
YBR117C	TKL2	2	474386	476431	0	0	12.3257	117	2	26	69
YBR123C	TFC1	2	484736	486685	0	0	4.16131	71	1	25
YBR131W	CCZ1	2	497157	499271	1	0	15.06	66	2	36	50
YBR132C	AGP2	2	499646	501436	0	0	3.7713	77	1	61
YBR133C	HSL7	2	501798	504281	0	0	7.32021	113	1	71
YBR136W	MEC1	2	505662	512768	1	0	6.10422	164	3	17	84	126
YBR140C	IRA1	2	517344	526622	0	0	15.8844	208	3	25	71	160
YBR141C		2	527019	528032	0	0	3.27641	54	2	18	49
YBR150C	TBS1	2	541203	544487	0	0	7.36708	83	1	40
YBR156C	SLI15	2	551098	553194	0	0	4.78911	57	1	16
YBR157C	ICS2	2	553537	554304	0	0	4.66063	29	1	11
YBR169C	SSE2	2	573910	575991	0	0	4.4016	90	1	52
YBR172C	SMY2	2	579145	581367	0	0	6.5169	103	1	36
YBR179C	FZO1	2	586542	589109	0	0	4.44238	59	1	22
YBR180W	DTR1	2	589736	591454	1	0	4.19932	75	1	65
YBR195C	MSI1	2	610609	611877	0	0	4.59876	63	1	60
YBR198C	TAF5	2	616122	618518	0	0	4.69033	92	1	50
YBR203W	COS111	2	629163	631937	1	0	7.14096	113	1	23
YBR207W	FTH1	2	635141	636538	1	0	3.30296	62	1	26
YBR208C	DUR1,2	2	636698	642205	0	0	62.1102	277	3	97	113	151
YBR212W	NGR1	2	647881	649899	1	0	12.559	94	1	60
YBR214W	SDS24	2	651410	652993	1	0	3.11452	79	1	37
YBR218C	PYC2	2	658702	662244	0	0	24.0295	188	2	92	114
YBR225W		2	670622	673324	1	0	5.61264	88	1	82
YBR229C	ROT2	2	676352	679216	0	0	3.87969	115	1	38
YBR234C	ARC40	2	685433	686587	0	0	3.98942	74	1	43
YBR235W		2	686896	690258	1	0	11.5092	123	2	48	83
YBR237W	PRP5	2	691964	694513	1	0	4.54066	80	1	49
YBR239C		2	698349	699938	0	0	8.51453	76	2	7	37
YBR245C	ISW1	2	708145	711534	0	0	12.6271	108	1	46
YBR260C	RGD1	2	732634	734634	0	0	3.79473	82	1	61
YBR263W	SHM1	2	736259	737731	1	0	14.8392	86	1	36
YBR267W	REI1	2	739836	741017	1	0	3.02927	67	1	40
YBR275C	RIF1	2	751351	757101	0	0	18.9433	143	1	78
YBR280C	SAF1	2	762780	764693	0	0	3.57877	75	1	20
YBR289W	SNF5	2	779663	782380	1	0	3.57618	135	1	83
YBR295W	PCA1	2	792843	796493	1	0	70.9089	194	3	32	110	127
YBR296C	PHO89	2	796792	798516	0	0	3.43627	64	1	61
YCL061C	MRC1	3	18816	22106	0	0	13.1182	104	2	74	92
YCL058C	FYV5	3	23523	23981	0	0	6.60757	19	1	14
YCL042W		3	50584	50943	1	0	3.68738	16	1	9
YCL039W	GID7	3	52645	54882	1	0	5.49535	137	1	92
YCL037C	SRO9	3	57374	58678	0	0	44.1024	92	1	36
YCL030C	HIS4	3	65934	68333	0	0	5.1109	161	1	89
YCL025C	AGP1	3	76018	77919	0	0	3.17123	125	1	66
YCL024W	KCC4	3	79162	82275	1	0	9.96824	123	2	8	58
YCL014W	BUD3	3	96281	101191	1	0	14.1883	139	2	92	111
YCR011C	ADP1	3	133722	136871	0	0	6.03988	97	1	78
YCR017C	CWH43	3	144771	147632	0	0	3.61274	116	1	101
YCR030C	SYP1	3	173822	176434	0	0	12.229	117	1	81
YCR032W	BPH1	3	179516	186019	1	0	9.33589	124	3	13	38	86
YCR033W	SNT1	3	186485	190165	1	0	22.0012	145	2	57	84
YCR037C	PHO87	3	194410	197181	0	0	6.21314	106	1	63
YCR045C		3	208131	209606	0	0	3.26134	80	1	43
YCR048W	ARE1	3	211925	213757	1	0	17.4466	87	1	50
YCR067C	SED4	3	233121	236318	0	0	9.73103	144	2	22	100
YCR068W	ATG15	3	237210	238772	1	0	9.18916	115	1	66
YCR072C	RSA4	3	240801	242348	0	0	4.30029	99	1	8
YCR073C	SSK22	3	242585	246580	0	0	4.25035	149	3	89	106	139
YCR081W	SRB8	3	254368	258651	1	0	6.12307	86	2	22	46
YCR084C	TUP1	3	260308	262449	0	0	3.25296	134	1	19
YCR087W		3	263973	264488	1	0	3.47057	25	1	22
YCR088W	ABP1	3	265065	266843	1	0	3.3917	99	2	7	72
YCR089W	FIG2	3	267431	272260	1	0	101.065	248	4	58	119	137	158
YCR091W	KIN82	3	274401	276563	1	0	4.94351	74	1	56
YCR092C	MSH3	3	276761	279904	0	0	4.24333	90	1	21
YCR093W	CDC39	3	280114	286440	1	0	3.37806	153	1	44
YCR106W	RDS1	3	310955	313453	1	0	5.48671	56	1	34
YDL239C	ADY3	4	26403	28775	0	0	6.30465	46	1	10
YDL231C	BRE4	4	38868	42245	0	0	17.9761	135	1	76
YDL225W	SHS1	4	52446	54101	1	0	5.18466	52	1	21
YDL223C	HBT1	4	57266	60406	0	0	5.72266	172	2	54	127
YDL218W		4	66494	67447	1	0	7.24101	76	1	58
YDL215C	GDH2	4	70641	73919	0	0	3.92688	83	1	62
YDL207W	GLE1	4	88249	89865	1	0	3.5402	63	1	36
YDL204W	RTN2	4	94606	95787	1	0	4.21849	61	1	12
YDL203C	ACK1	4	96083	97954	0	0	6.57054	72	1	16
YDL197C	ASF2	4	104918	106495	0	0	4.63988	102	1	43
YDL195W	SEC31	4	107209	111030	1	0	34.8708	199	2	94	143
YDL194W	SNF3	4	111581	114235	1	0	3.10402	101	2	7	53
YDL190C	UFD2	4	118708	121593	0	0	24.9444	86	3	12	39	58
YDL185W	TFP1	4	126788	130003	1	0	14.6917	152	1	107
YDL174C	DLD1	4	145827	147590	0	0	5.54221	113	1	44
YDL171C	GLT1	4	149204	155641	0	0	17.8315	310	5	37	112	172	230	291
YDL164C	CDC9	4	164988	167255	0	0	4.75622	85	1	43
YDL160C	DHH1	4	170411	171931	0	0	6.123	59	1	31
YDL154W	MSH5	4	178335	181040	1	0	27.9257	61	2	33	39
YDL149W	ATG9	4	184926	187919	1	0	24.6366	89	1	46
YDL145C	COP1	4	194572	198177	0	0	19.0754	158	3	26	82	143
YDL141W	BPL1	4	203040	205112	1	0	3.66603	90	1	49
YDL140C	RPO21	4	205361	210562	0	0	22.446	247	1	74
YDL139C	SCM3	4	211376	212047	0	0	3.6554	40	2	14	32
YDL138W	RGT2	4	213352	215643	1	0	3.97658	131	1	27
YDL126C	CDC48	4	236157	238664	0	0	7.92743	150	1	85
YDL125C	HNT1	4	239019	239606	0	0	5.7998	31	1	26
YDL117W	CYK3	4	248581	251238	1	0	12.3092	109	2	57	87
YDL112W	TRM3	4	258915	263225	1	0	10.7187	110	1	70
YDL109C		4	265258	267201	0	0	6.06492	86	1	63
YDL102W	POL3	4	276872	280165	1	0	25.4858	97	1	65
YDL095W	PMT1	4	287059	289512	1	0	3.26854	127	1	24
YDL085W	NDE2	4	303211	304848	1	0	3.53825	82	1	30
YDL080C	THI3	4	310642	312471	0	0	11.773	102	1	23
YDL079C	MRK1	4	312951	314748	0	0	3.14505	54	1	41
YDL077C	VAM6	4	316971	320120	0	0	8.98431	80	1	51
YDL058W	USO1	4	345665	351037	1	0	15.9808	135	3	9	89	110
YDL048C	STP4	4	366739	368211	0	0	5.10225	90	1	57
YDL044C	MTF2	4	373964	375286	0	0	4.48536	39	1	17
YDL040C	NAT1	4	378871	381435	0	0	6.5376	70	1	38
YDL038C		4	382327	384078	0	0	10.3267	124	2	30	74
YDL035C	GPR1	4	389169	392054	0	0	7.836	71	1	35
YDL031W	DBP10	4	394214	397201	1	0	16.3961	109	1	77
YDL030W	PRP9	4	397534	399126	1	0	8.20955	40	1	20
YDL019C	OSH2	4	417660	421511	0	0	21.8918	178	3	37	91	141
YDL003W	MCD1	4	444680	446380	1	0	3.81382	61	1	43
YDR001C	NTH1	4	450217	452472	0	0	3.42314	86	1	36
YDR006C	SOK1	4	458539	461244	0	0	4.03664	73	1	34
YDR011W	SNQ2	4	465916	470421	1	0	5.88582	184	4	39	74	106	149
YDR028C	REG1	4	497832	500876	0	0	3.29609	130	1	53
YDR030C	RAD28	4	501750	503270	0	0	10.9778	41	1	28
YDR046C	BAP3	4	548760	550574	0	0	3.19251	79	1	53
YDR049W		4	553252	555150	1	0	4.12852	78	1	51
YDR069C	DOA4	4	584937	587717	0	0	3.37995	62	1	52
YDR074W	TPS2	4	593890	596580	1	0	19.6938	100	3	12	35	70
YDR081C	PDC2	4	607301	610078	0	0	8.50029	90	1	8
YDR089W		4	622109	624718	1	0	7.09809	74	1	43
YDR093W	DNF2	4	631279	636117	1	0	14.7662	210	3	19	97	137
YDR096W	GIS1	4	637136	639820	1	0	8.31679	67	1	26
YDR104C	SPO71	4	661170	664907	0	0	32.5094	110	1	56
YDR107C	TMN2	4	669013	671031	0	0	5.89302	74	1	19
YDR108W	GSG1	4	671266	673362	1	0	13.5943	72	1	52
YDR109C		4	673517	675664	0	0	10.5268	81	1	67
YDR110W	FOB1	4	676099	677799	1	0	6.53558	37	1	9
YDR122W	KIN1	4	694697	697891	1	0	17.4201	157	2	52	104
YDR123C	INO2	4	698551	699465	0	0	7.19039	40	1	31
YDR127W	ARO1	4	704481	709247	1	0	19.6197	202	2	60	167
YDR128W		4	709546	712992	1	0	49.1932	111	2	55	75
YDR135C	YCF1	4	723001	727548	0	0	8.72235	161	1	107
YDR141C	DOP1	4	734898	739994	0	0	4.61939	92	1	39
YDR143C	SAN1	4	742039	743871	0	0	4.64527	103	1	87
YDR150W	NUM1	4	755625	763871	1	0	23.2022	202	2	71	128
YDR159W	SAC3	4	771874	775779	1	0	11.9309	85	1	56
YDR166C	SEC5	4	786303	789218	0	0	4.12274	32	1	15
YDR170C	SEC7	4	796190	802219	0	0	33.6252	200	2	53	115
YDR172W	SUP35	4	808321	810378	1	0	3.16146	108	1	31
YDR180W	SCC2	4	821292	825773	1	0	3.91281	77	1	39
YDR181C	SAS4	4	825907	827352	0	0	11.0659	52	1	12
YDR186C		4	832856	835489	0	0	8.1695	121	1	46
YDR192C	NUP42	4	843566	844858	0	0	6.89533	82	1	61
YDR208W	MSS4	4	868221	870560	1	0	10.9878	82	2	24	54
YDR213W	UPC2	4	889748	892489	1	0	6.4161	162	2	36	113
YDR216W	ADR1	4	895031	899002	1	0	6.9202	89	2	45	71
YDR227W	SIR4	4	917567	921643	1	0	15.6756	119	2	49	92
YDR232W	HEM1	4	927448	929094	1	0	5.36765	92	1	46
YDR234W	LYS4	4	931125	933206	1	0	6.22686	113	2	35	86
YDR238C	SEC26	4	937891	940812	0	0	5.64484	117	1	84
YDR244W	PEX5	4	950559	952397	1	0	7.85111	83	2	10	41
YDR251W	PAM1	4	960610	963102	1	0	7.03211	74	1	24
YDR258C	HSP78	4	971804	974239	0	0	5.97286	90	2	8	52
YDR270W	CCC2	4	1005671	1008685	1	0	9.4376	93	2	34	58
YDR283C	GCN2	4	1025066	1030045	0	0	7.40933	103	2	33	97
YDR291W		4	1039724	1042957	1	0	12.6003	107	1	41
YDR293C	SSD1	4	1045636	1049388	0	0	22.1067	180	2	37	75
YDR295C	HDA2	4	1052619	1054643	0	0	6.08877	62	1	34
YDR310C	SUM1	4	1081124	1084312	0	0	3.4147	139	1	103
YDR312W	SSF2	4	1087578	1088939	1	0	10.6543	41	2	11	19
YDR325W	YCG1	4	1117121	1120228	1	0	6.61465	100	2	62	91
YDR326C	YSP2	4	1120604	1124920	0	0	3.39464	100	1	18
YDR334W	SWR1	4	1135927	1140471	1	0	4.83236	136	1	89
YDR335W	MSN5	4	1141162	1144836	1	0	4.90822	91	1	37
YDR338C		4	1147373	1149460	0	0	16.5519	93	1	33
YDR349C	YPS7	4	1172380	1174170	0	0	3.07279	93	1	55
YDR356W	SPC110	4	1186100	1188934	1	0	3.49299	33	1	20
YDR362C	TFC6	4	1196671	1198689	0	0	16.2917	79	1	34
YDR369C	XRS2	4	1215008	1217572	0	0	6.77075	66	2	17	46
YDR379W	RGA2	4	1230159	1233188	1	0	6.8986	116	1	53
YDR380W	ARO10	4	1234210	1236117	1	0	4.94583	59	1	27
YDR386W	MUS81	4	1246076	1247974	1	0	8.33551	59	1	41
YDR387C		4	1248146	1249813	0	0	3.51788	60	1	25
YDR395W	SXM1	4	1263316	1266150	1	0	4.2608	82	1	26
YDR406W	PDR15	4	1279202	1283791	1	0	42.8172	216	3	18	120	173
YDR407C	TRS120	4	1284061	1287930	0	0	4.92785	107	1	36
YDR409W	SIZ1	4	1289398	1292112	1	0	33.8112	101	3	39	65	96
YDR416W	SYF1	4	1298424	1301003	1	0	3.23749	62	2	7	35
YDR419W	RAD30	4	1303166	1305064	1	0	8.59742	78	4	13	40	46	66
YDR420W	HKR1	4	1306259	1311667	1	0	28.8765	219	4	26	108	175	208
YDR421W	ARO80	4	1312032	1314884	1	0	7.78031	110	2	27	86
YDR430C	CYM1	4	1325493	1328462	0	0	8.66559	85	1	35
YDR432W	NPL3	4	1328775	1330019	1	0	5.18134	68	1	47
YDR436W	PPZ2	4	1334813	1336945	1	0	3.47691	97	2	16	69
YDR438W	THI74	4	1338266	1339378	1	0	4.32566	37	1	30
YDR443C	SSN2	4	1345668	1349930	0	0	29.3501	144	3	28	67	90
YDR447C	RPS17B	4	1354821	1355545	0	0	6.88605	17	1	10
YDR452W	PPN1	4	1362870	1364894	1	0	4.97103	72	1	11
YDR457W	TOM1	4	1369782	1379588	1	0	34.3799	316	5	48	129	176	263	291
YDR464W	SPP41	4	1388864	1393171	1	0	18.6635	179	2	80	171
YDR466W	PKH3	4	1395113	1397809	1	0	8.54372	95	2	43	62
YDR475C	JIP4	4	1407456	1410086	0	0	12.3922	121	1	63
YDR480W	DIG2	4	1417391	1418362	1	0	4.81622	53	1	38
YDR485C	VPS72	4	1424812	1427199	0	0	20.2759	96	2	49	61
YDR495C	VPS3	4	1438107	1441142	0	0	5.08547	40	2	7	17
YDR497C	ITR1	4	1443705	1445459	0	0	3.99842	113	1	41
YDR501W	PLM2	4	1451345	1452910	1	0	5.33101	51	1	39
YDR505C	PSP1	4	1456687	1459212	0	0	3.56173	72	1	28
YDR507C	GIN4	4	1462350	1465778	0	0	10.1653	104	2	46	82
YDR508C	GNP1	4	1466445	1468436	0	0	6.45041	82	2	29	65
YDR520C	URC2	4	1481077	1483395	0	0	36.1097	58	1	14
YDR534C	FIT1	4	1503305	1504891	0	0	3.47507	103	2	16	51
YDR536W	STL1	4	1507996	1509705	1	0	4.16625	84	1	54
YEL077C		5	264	4097	0	0	4.22835	29	1	15
YEL055C	POL5	5	48471	51539	0	0	3.12552	62	1	22
YEL043W		5	70478	73348	1	0	19.7159	147	2	55	72
YEL036C	ANP1	5	83050	84552	0	0	7.26142	77	1	26
YEL032W	MCM3	5	86937	89852	1	0	26.0842	171	2	78	91
YEL031W	SPF1	5	90258	93905	1	0	15.8696	141	2	49	89
YEL030W	ECM10	5	94644	96578	1	0	6.39447	76	1	42
YEL025C		5	102581	106147	0	0	7.53183	108	2	16	53
YEL022W	GEA2	5	111421	115800	1	0	9.42064	100	1	39
YEL020C		5	118617	120299	0	0	8.17939	86	1	72
YEL015W	EDC3	5	126629	128284	1	0	4.65835	74	1	39
YEL011W	GLC3	5	133120	135234	1	0	16.4172	104	2	11	42
YER001W	MNN1	5	153519	155807	1	0	4.88383	81	1	18
YER005W	YND1	5	160549	162441	1	0	3.54915	92	1	46
YER008C	SEC3	5	167807	171817	0	0	8.06814	111	2	26	82
YER013W	PRP22	5	178840	182277	1	0	9.90262	116	1	55
YER019W	ISC1	5	192796	194229	1	0	10.5351	91	1	6
YER033C	ZRG8	5	218056	221286	0	0	9.14878	115	1	68
YER041W	YEN1	5	232460	234739	1	0	3.64316	64	1	27
YER047C	SAP1	5	243809	246502	0	0	6.25206	93	2	19	56
YER051W	JHD1	5	254655	256133	1	0	5.31583	38	1	17
YER052C	HOM3	5	256374	257957	0	0	3.16211	76	1	55
YER054C	GIP2	5	262051	263697	0	0	3.16996	63	1	21
YER056C	FCY2	5	266511	268112	0	0	3.74974	79	1	46
YER060W-A	FCY22	5	276570	278162	1	0	5.60604	71	1	48
YER070W	RNR1	5	298948	301614	1	0	13.9403	141	2	39	77
YER075C	PTP3	5	308409	311195	0	0	14.2082	94	2	54	84
YER088C	DOT6	5	333172	335184	0	0	12.2087	126	2	62	108
YER093C	TSC11	5	343316	347608	0	0	33.6465	114	2	50	64
YER096W	SHC1	5	351694	353232	1	0	4.52161	70	1	19
YER098W	UBP9	5	355462	357726	1	0	10.6161	56	1	39
YER103W	SSA4	5	364585	366513	1	0	7.8564	94	1	54
YER105C	NUP157	5	367834	372009	0	0	6.61811	93	2	34	63
YER109C	FLO8	5	375211	377610	0	0	3.62138	114	3	15	48	78
YER110C	KAP123	5	378758	382099	0	0	6.55454	157	1	86
YER114C	BOI2	5	390586	393708	0	0	6.27493	164	1	40
YER125W	RSP5	5	410185	412614	1	0	3.96885	122	1	88
YER127W	LCP5	5	414477	415550	1	0	3.35082	59	1	11
YER129W	SAK1	5	417277	420705	1	0	15.7354	126	1	59
YER144C	UBP5	5	457801	460218	0	0	5.84924	93	1	68
YER145C	FTR1	5	460521	461735	0	0	3.99559	80	1	39
YER147C	SCC4	5	462963	464837	0	0	4.46064	94	3	21	53	72
YER155C	BEM2	5	476340	482843	0	0	27.5486	155	2	57	96
YER158C		5	488852	490573	0	0	5.92008	90	1	36
YER162C	RAD4	5	500625	502889	0	0	9.734	94	2	37	78
YER164W	CHD1	5	505387	509793	1	0	27.3843	180	2	87	135
YER165W	PAB1	5	510368	512101	1	0	5.16955	83	1	36
YER166W	DNF1	5	512739	517454	1	0	21.4476	174	3	31	76	150
YER167W	BCK2	5	518211	520766	1	0	8.80125	114	1	54
YER169W	RPH1	5	523364	525754	1	0	6.05237	115	1	62
YER171W	RAD3	5	527077	529413	1	0	8.30775	82	1	40
YER173W	RAD24	5	536295	538274	1	0	3.41557	58	1	40
YER176W	ECM32	5	541685	545050	1	0	3.24931	118	3	7	21	45
YER184C		5	556291	558675	0	0	6.20159	86	1	31
YFL054C		6	20847	22787	0	0	13.2773	108	2	10	56
YFL053W	DAK2	6	23423	25198	1	0	4.08482	114	1	65
YFL050C	ALR2	6	33272	35848	0	0	6.2827	125	2	16	83
YFL049W	SWP82	6	36803	38674	1	0	3.14687	58	1	45
YFL042C		6	45720	47744	0	0	41.5832	109	3	31	41	66
YFL041W	FET5	6	49139	51007	1	0	3.7592	98	2	32	59
YFL038C	YPT1	6	55365	55985	0	0	4.38075	50	1	22
YFL036W	RPO41	6	58781	62836	1	0	6.3648	141	2	37	104
YFL034W		6	65475	68696	1	0	49.8484	139	3	70	82	114
YFL033C	RIM15	6	69113	74425	0	0	23.2017	254	2	115	207
YFL026W	STE2	6	82578	83873	1	0	4.49399	45	1	21
YFL025C	BST1	6	84143	87232	0	0	5.1514	88	1	34
YFL024C	EPL1	6	87845	90343	0	0	3.64909	75	1	55
YFL023W	BUD27	6	90984	93374	1	0	3.56414	103	1	49
YFL016C	MDJ1	6	104695	106230	0	0	4.44721	93	1	25
YFL014W	HSP12	6	107250	107579	1	0	3.71923	22	1	15
YFL009W	CDC4	6	116139	118478	1	0	5.38111	72	1	49
YFL008W	SMC1	6	119424	123101	1	0	5.33367	76	2	16	46
YFL007W	BLM10	6	123474	129905	1	0	37.5196	216	3	87	115	170
YFR006W		6	156139	157746	1	0	8.27992	50	1	5
YFR015C	GSY1	6	174257	176383	0	0	21.4849	112	2	62	103
YFR016C		6	177034	180735	0	0	11.814	144	2	31	63
YFR017C		6	182262	182849	0	0	4.20341	32	1	25
YFR019W	FAB1	6	184490	191326	1	0	23.5184	209	3	65	131	180
YFR020W		6	192726	193424	1	0	3.25906	35	1	25
YFR022W	ROG3	6	196821	199022	1	0	7.69496	97	1	31
YFR029W	PTR3	6	210925	212961	1	0	10.1808	117	1	69
YFR030W	MET10	6	213300	216407	1	0	11.0737	135	2	8	109
YFR031C	SMC2	6	216582	220094	0	0	15.0113	95	1	60
YFR034C	PHO4	6	225008	225946	0	0	4.65752	51	1	36
YFR040W	SAP155	6	234229	237237	1	0	5.09987	85	2	27	69
YGL251C	HFM1	7	27921	31636	0	0	3.85289	78	1	13
YGL243W	TAD1	7	43307	44509	1	0	4.87505	40	1	18
YGL240W	DOC1	7	48613	49365	1	0	3.10035	57	1	46
YGL236C	MTO1	7	53787	55796	0	0	4.39064	128	1	121
YGL234W	ADE5,7	7	56482	58890	1	0	5.56097	165	2	32	75
YGL229C	SAP4	7	64503	66959	0	0	3.33249	62	1	13
YGL216W	KIP3	7	84884	87301	1	0	12.7932	104	1	71
YGL215W	CLG1	7	87980	89338	1	0	4.86357	32	1	24
YGL209W	MIG2	7	95862	97010	1	0	5.99956	78	1	34
YGL207W	SPT16	7	98973	102080	1	0	3.09966	88	1	34
YGL206C	CHC1	7	102547	107508	0	0	15.2375	150	2	18	55
YGL203C	KEX1	7	112479	114668	0	0	4.70957	74	1	25
YGL201C	MCM6	7	117858	120911	0	0	11.9558	137	2	24	62
YGL197W	MDS3	7	124703	129166	1	0	24.4195	198	4	60	77	126	172
YGL195W	GCN1	7	131531	139549	1	0	39.5555	296	3	108	182	239
YGL194C	HOS2	7	140374	141732	0	0	3.36884	47	1	39
YGL178W	MPT5	7	167358	170577	1	0	4.57956	87	2	9	61
YGL173C	KEM1	7	175533	180119	0	0	16.5277	140	2	43	81
YGL163C	RAD54	7	193713	196409	0	0	12.1831	109	2	20	72
YGL160W		7	200567	202279	1	0	3.70184	37	1	26
YGL150C	INO80	7	221109	225578	0	0	8.87645	169	3	34	90	156
YGL144C	ROG1	7	232455	234512	0	0	5.15336	71	3	15	30	52
YGL142C	GPI10	7	236274	238124	0	0	29.7538	56	1	26
YGL141W	HUL5	7	238358	241090	1	0	29.4964	64	2	41	48
YGL140C		7	241358	245017	0	0	17.8108	132	2	32	85
YGL139W	FLC3	7	245721	248129	1	0	12.9749	96	1	62
YGL137W	SEC27	7	249874	252743	1	0	13.251	126	4	8	36	64	108
YGL133W	ITC1	7	257712	261506	1	0	14.1834	122	3	22	57	85
YGL131C	SNT2	7	261653	265864	0	0	7.67463	103	3	11	40	81
YGL122C	NAB2	7	278952	280529	0	0	4.82894	83	1	40
YGL120C	PRP43	7	281640	283943	0	0	4.07016	114	1	89
YGL114W		7	293463	295640	1	0	29.9972	101	2	55	66
YGL094C	PAN2	7	331121	334468	0	0	4.09246	96	1	47
YGL093W	SPC105	7	334889	337642	1	0	5.93029	98	1	87
YGL092W	NUP145	7	337909	341862	1	0	10.0315	115	1	63
YGL083W	SCY1	7	353061	355475	1	0	8.75084	54	1	26
YGL073W	HSF1	7	368756	371257	1	0	8.87971	79	1	28
YGL071W	AFT1	7	372015	374087	1	0	4.06824	92	1	42
YGL066W	SGF73	7	377612	379585	1	0	7.644	79	1	64
YGL063W	PUS2	7	383657	384769	1	0	5.31252	65	1	29
YGL062W	PYC1	7	385199	388735	1	0	15.0852	168	1	83
YGL060W	YBP2	7	390070	391995	1	0	3.52429	62	1	32
YGL049C	TIF4632	7	406863	409607	0	0	5.72914	97	1	53
YGL045W	RIM8	7	414106	415734	1	0	20.0368	65	2	36	45
YGL036W		7	428606	431335	1	0	6.57504	67	1	38
YGL035C	MIG1	7	431553	433067	0	0	3.81106	82	2	24	71
YGL027C	CWH41	7	443647	446148	0	0	4.56438	113	1	61
YGL026C	TRP5	7	446417	448540	0	0	5.19457	149	1	43
YGL023C	PIB2	7	450202	452109	0	0	9.55597	110	1	33
YGL022W	STT3	7	452409	454565	1	0	7.61276	137	1	48
YGL014W	PUF4	7	466146	468812	1	0	7.17825	94	1	40
YGL013C	PDR1	7	469097	472303	0	0	15.0755	100	1	36
YGL008C	PMA1	7	479915	482671	0	0	15.6306	182	2	75	166
YGL006W	PMC1	7	485925	489446	1	0	23.0535	118	2	53	109
YGR002C	SWC4	7	498480	499910	0	0	3.63872	53	1	27
YGR013W	SNU71	7	514558	516420	1	0	10.613	85	1	28
YGR014W	MSB2	7	516947	520867	1	0	15.84	255	2	79	173
YGR019W	UGA1	7	525233	526648	1	0	3.27547	69	1	39
YGR023W	MTL1	7	529268	530923	1	0	3.40052	60	1	38
YGR032W	GSC2	7	548268	553955	1	0	25.842	210	3	23	111	175
YGR047C	TFC4	7	586396	589473	0	0	9.86647	95	1	46
YGR056W	RSC1	7	601665	604451	1	0	8.82431	73	1	29
YGR058W	PEF1	7	606140	607147	1	0	3.39651	45	1	13
YGR061C	ADE6	7	611893	615969	0	0	18.3732	197	2	57	114
YGR079W		7	640724	641836	1	0	5.64324	61	1	5
YGR090W	UTP22	7	662362	666075	1	0	5.54082	81	1	47
YGR092W	DBF2	7	668193	669911	1	0	3.38807	63	1	32
YGR094W	VAS1	7	672190	675504	1	0	9.65767	133	1	50
YGR097W	ASK10	7	678699	682139	1	0	26.5832	163	3	60	104	131
YGR098C	ESP1	7	682570	687462	0	0	12.3891	76	2	21	52
YGR100W	MDR1	7	690249	693101	1	0	16.4215	110	2	52	91
YGR121C	MEP1	7	731454	732932	0	0	6.26822	86	2	21	63
YGR125W		7	742330	745440	1	0	7.57616	80	1	41
YGR130C		7	751399	753849	0	0	4.32832	96	1	46
YGR134W	CAF130	7	757775	761143	1	0	11.8779	110	1	28
YGR138C	TPO2	7	763767	765611	0	0	7.25045	57	2	17	30
YGR141W	VPS62	7	770574	771977	1	0	3.87797	57	1	28
YGR143W	SKN1	7	775198	777513	1	0	3.34349	120	1	48
YGR144W	THI4	7	780404	781384	1	0	10.7808	74	1	34
YGR145W	ENP2	7	781772	783895	1	0	3.16308	64	1	45
YGR156W	PTI1	7	800551	801828	1	0	3.42565	42	1	31
YGR161C	RTS3	7	808634	809425	0	0	3.16856	52	1	28
YGR162W	TIF4631	7	824064	826922	1	0	7.82636	133	2	65	111
YGR184C	UBR1	7	859906	865758	0	0	13.4533	124	1	78
YGR186W	TFG1	7	867779	869986	1	0	3.56463	98	2	15	69
YGR188C	BUB1	7	872049	875114	0	0	17.1892	89	2	25	41
YGR189C	CRH1	7	876674	878197	0	0	6.97811	98	2	54	80
YGR196C	FYV8	7	889738	892191	0	0	29.5148	101	2	22	60
YGR204W	ADE3	7	905939	908779	1	0	21.9717	220	1	116
YGR216C	GPI1	7	922638	924467	0	0	3.00999	25	1	4
YGR217W	CCH1	7	924699	930818	1	0	35.1312	166	3	18	49	89
YGR218W	CRM1	7	932544	935798	1	0	3.95461	79	1	28
YGR237C		7	963303	965660	0	0	6.72754	87	1	29
YGR238C	KEL2	7	966044	968692	0	0	15.6493	88	1	23
YGR239C	PEX21	7	969192	970058	0	0	3.67977	52	1	40
YGR240C	PFK1	7	970776	973739	0	0	3.47443	169	2	123	137
YGR246C	BRF1	7	982487	984277	0	0	12.9913	80	1	32
YGR256W	GND2	7	1004630	1006108	1	0	11.0378	83	1	40
YGR258C	RAD2	7	1007677	1010772	0	0	9.57325	142	2	19	120
YGR270W	YTA7	7	1027376	1031515	1	0	4.41512	135	2	55	91
YGR271W	SLH1	7	1031797	1037700	1	0	17.9477	165	4	20	46	102	138
YGR274C	TAF1	7	1039901	1043101	0	0	4.17472	110	1	104
YGR281W	YOR1	7	1052830	1057263	1	0	10.8689	140	2	28	79
YGR289C	MAL11	7	1073969	1075819	0	0	20.2432	77	2	43	54
YHL040C	ARN1	8	19085	20968	0	0	8.65698	96	2	73	86
YHL035C	VMR1	8	27976	32754	0	0	13.9286	129	1	59
YHL032C	GUT1	8	36377	38506	0	0	9.85871	125	1	33
YHL030W	ECM29	8	40082	45688	1	0	15.9985	177	1	96
YHL028W	WSC4	8	48761	50578	1	0	6.4745	97	2	27	69
YHL027W	RIM101	8	51109	52986	1	0	3.47824	118	1	64
YHL023C	RMD11	8	59121	62561	0	0	5.86508	95	2	53	91
YHL021C		8	64459	65856	0	0	3.46167	55	1	22
YHL016C	DUR3	8	72034	74241	0	0	5.52719	79	1	51
YHR023W	MYO1	8	151659	157445	1	0	6.20901	102	1	50
YHR027C	RPN1	8	161723	164704	0	0	7.25411	125	1	48
YHR031C	RRM3	8	170792	172963	0	0	5.0747	93	1	85
YHR033W		8	175541	176812	1	0	4.02854	89	1	27
YHR040W	BCD1	8	187917	189017	1	0	4.67152	82	1	77
YHR041C	SRB2	8	189124	189857	0	0	4.02505	39	1	35
YHR042W	NCP1	8	190536	192611	1	0	5.58947	129	2	18	89
YHR044C	DOG1	8	194061	194801	0	0	3.88841	36	1	18
YHR062C	RPP1	8	222879	223760	0	0	8.84709	61	1	58
YHR072W	ERG7	8	239100	241295	1	0	3.49055	81	1	30
YHR073W	OSH3	8	242584	245574	1	0	5.02537	119	1	36
YHR074W	QNS1	8	246195	248339	1	0	4.37341	92	1	75
YHR077C	NMD2	8	252376	255758	0	0	6.33854	85	1	30
YHR079C	IRE1	8	258246	261593	0	0	4.14033	83	1	30
YHR080C		8	262803	266840	0	0	5.67303	144	2	61	109
YHR082C	KSP1	8	268461	271550	0	0	10.8248	89	1	62
YHR091C	MSR1	8	284841	286772	0	0	4.02748	75	1	63
YHR097C		8	297388	298612	0	0	5.69922	60	1	50
YHR099W	TRA1	8	302764	313998	1	0	18.412	281	4	42	92	189	246
YHR102W	KIC1	8	316575	319817	1	0	15.5394	158	3	27	47	146
YHR103W	SBE22	8	320417	322975	1	0	3.70331	89	1	45
YHR106W	TRR2	8	325601	326629	1	0	3.20778	49	1	38
YHR108W	GGA2	8	328306	330063	1	0	3.96984	85	1	29
YHR116W	COX23	8	341668	342123	1	0	8.33145	31	1	9
YHR117W	TOM71	8	342352	344271	1	0	5.42593	97	1	68
YHR119W	SET1	8	346046	349288	1	0	8.92329	100	1	47
YHR124W	NDT80	8	356564	358447	1	0	8.68836	58	1	49
YHR131C		8	365343	367895	0	0	4.16238	110	1	22
YHR137W	ARO9	8	375712	377253	1	0	3.18518	51	1	7
YHR149C	SKG6	8	394458	396662	0	0	20.1452	122	1	63
YHR158C	KEL1	8	413688	417182	0	0	13.9339	137	2	15	73
YHR164C	DNA2	8	424612	429180	0	0	39.4068	147	4	26	55	79	112
YHR165C	PRP8	8	429709	436950	0	0	30.5693	230	3	97	129	195
YHR166C	CDC23	8	437172	439052	0	0	4.76679	67	1	24
YHR172W	SPC97	8	448335	450806	1	0	7.55404	64	1	18
YHR177W		8	456591	457952	1	0	4.83373	71	1	43
YHR182W		8	468219	470576	1	0	12.2308	66	1	37
YHR186C	KOG1	8	475999	480672	0	0	12.1895	185	3	38	119	170
YHR188C	GPI16	8	482005	483837	0	0	5.87602	111	1	48
YHR204W	MNL1	8	506319	508709	1	0	12.4524	108	1	51
YHR205W	SCH9	8	509363	511837	1	0	6.30106	125	2	52	101
YHR211W	FLO5	8	525392	528619	1	0	11.9862	152	2	43	134
YIL169C		9	23119	26106	0	0	36.074	195	2	113	153
YIL156W	UBP7	9	48091	51306	1	0	17.0592	137	2	88	122
YIL155C	GUT2	9	51759	53708	0	0	4.2293	102	1	29
YIL151C		9	57338	60694	0	0	6.38224	90	1	41
YIL150C	MCM10	9	61013	62728	0	0	3.34736	51	2	32	46
YIL149C	MLP2	9	63028	68067	0	0	7.252	84	1	42
YIL147C	SLN1	9	69791	73453	0	0	19.8836	144	2	58	92
YIL146C	ECM37	9	74184	75773	0	0	5.58387	58	1	17
YIL144W	TID3	9	78074	80149	1	0	3.3027	49	1	36
YIL143C	SSL2	9	80510	83041	0	0	3.24086	123	2	29	51
YIL140W	AXL2	9	85366	87837	1	0	8.92603	103	2	48	69
YIL137C	TMA108	9	89948	92788	0	0	4.42961	124	2	41	118
YIL136W	OM45	9	93619	94800	1	0	7.03758	73	1	16
YIL130W	ASG1	9	102782	105676	1	0	4.02921	82	1	66
YIL129C	TAO3	9	106107	113237	0	0	38.5508	216	3	54	114	147
YIL125W	KGD1	9	122689	125733	1	0	6.61018	142	2	28	105
YIL121W	QDR2	9	132241	133869	1	0	4.00029	79	1	27
YIL119C	RPI1	9	136651	137874	0	0	7.2197	21	1	15
YIL116W	HIS5	9	142925	144082	1	0	4.49842	52	1	25
YIL115C	NUP159	9	144324	148706	0	0	6.0885	166	3	44	70	138
YIL112W	HOS4	9	151592	154843	1	0	21.5868	121	3	23	86	104
YIL109C	SEC24	9	157382	160162	0	0	4.06596	139	2	69	119
YIL108W		9	160884	162974	1	0	4.72454	118	2	19	69
YIL101C	XBP1	9	175304	177247	0	0	4.88364	109	1	47
YIL099W	SGA1	9	178001	179650	1	0	3.09181	111	1	54
YIL095W	PRK1	9	183934	186366	1	0	11.3926	73	1	26
YIL079C	AIR1	9	210920	212002	0	0	5.02061	48	1	30
YIL075C	RPN2	9	217860	220697	0	0	9.48959	121	2	24	105
YIL073C	SPO22	9	222934	225951	0	0	4.65491	56	1	22
YIL069C	RPS24B	9	231550	232366	0	0	3.1636	21	1	20
YIL068C	SEC6	9	233054	235471	0	0	10.7031	54	1	29
YIL067C		9	235721	237757	0	0	6.40108	109	1	56
YIL066C	RNR3	9	238096	240705	0	0	5.58014	136	1	72
YIL064W		9	241940	242713	1	0	4.89079	43	1	6
YIL063C	YRB2	9	242758	243741	0	0	7.53981	51	1	42
YIL056W	VHR1	9	249989	251911	1	0	5.00232	92	2	29	79
YIL055C		9	252040	253923	0	0	4.6147	76	1	38
YIL048W	NEO1	9	261436	264891	1	0	14.0543	86	1	52
YIL046W	MET30	9	268650	270572	1	0	12.6765	139	1	13
YIL031W	ULP2	9	292632	295736	1	0	15.5471	64	1	29
YIL030C	SSM4	9	296049	300008	0	0	7.40611	114	1	26
YIL026C	IRR1	9	304475	307927	0	0	12.0812	98	2	22	71
YIL022W	TIM44	9	311163	312458	1	0	4.9947	77	1	62
YIL017C	VID28	9	318198	320963	0	0	7.46593	87	2	42	68
YIL015W	BAR1	9	322340	324103	1	0	4.91008	87	2	24	70
YIL013C	PDR11	9	328205	332440	0	0	18.8213	172	2	41	129
YIL009W	FAA3	9	339341	341425	1	0	5.37476	92	1	32
YIL002C	INP51	9	350588	353428	0	0	5.60103	67	2	17	36
YIR002C	MPH1	9	357412	360393	0	0	3.62116	74	1	22
YIR003W		9	360882	362921	1	0	4.92592	105	1	61
YIR006C	PAN1	9	365463	369905	0	0	6.66659	195	3	37	109	152
YIR007W		9	370701	372995	1	0	17.9421	92	1	61
YIR012W	SQT1	9	378483	379778	1	0	3.32837	80	1	63
YIR019C	MUC1	9	389569	393672	0	0	8.38803	177	3	45	128	144
YIR023W	DAL81	9	399774	402686	1	0	3.44203	96	2	21	61
YIR027C	DAL1	9	406257	407639	0	0	3.92269	98	1	29
YIR028W	DAL4	9	408465	410372	1	0	3.30705	94	2	9	61
YIR029W	DAL2	9	410804	411835	1	0	3.11181	56	1	41
YIR033W	MGA2	9	416121	419462	1	0	3.74649	95	1	40
YJL212C	OPT1	10	33850	36249	0	0	18.0339	116	2	40	62
YJL207C	LAA1	10	41389	47433	0	0	3.76861	120	1	36
YJL206C		10	47659	49935	0	0	24.2086	71	1	22
YJL204C	RCY1	10	50629	53151	0	0	7.8842	42	1	26
YJL198W	PHO90	10	60843	63488	1	0	15.3431	124	2	32	73
YJL197W	UBP12	10	63804	67568	1	0	23.6874	116	1	60
YJL187C	SWE1	10	76802	79261	0	0	4.81749	84	1	19
YJL172W	CPS1	10	97731	99461	1	0	3.33207	75	1	56
YJL171C		10	99698	100888	0	0	3.91354	48	1	5
YJL168C	SET2	10	102221	104422	0	0	6.2661	64	1	49
YJL165C	HAL5	10	106888	109455	0	0	9.79887	106	1	64
YJL146W	IDS2	10	143289	144698	1	0	9.62387	52	1	42
YJL141C	YAK1	10	147964	150387	0	0	4.90804	71	3	37	59	68
YJL138C	TIF2	10	153501	154688	0	0	4.55968	11	1	7
YJL137C	GLG2	10	154982	156124	0	0	8.64827	41	1	35
YJL134W	LCB3	10	158185	159414	1	0	9.88336	61	1	54
YJL130C	URA2	10	165720	172364	0	0	14.1455	291	3	52	169	241
YJL129C	TRK1	10	173596	177303	0	0	20.3813	151	2	19	81
YJL127C	SPT10	10	182296	184218	0	0	5.32475	57	1	55
YJL112W	MDV1	10	205301	207445	1	0	5.06098	90	1	18
YJL109C	UTP10	10	211996	217305	0	0	6.22259	93	2	25	80
YJL108C	PRM10	10	217701	218852	0	0	3.11711	59	1	43
YJL103C	GSM1	10	229021	230877	0	0	4.45265	55	1	51
YJL102W	MEF2	10	231297	233756	1	0	11.9248	81	2	28	74
YJL101C	GSH1	10	234316	236352	0	0	9.86653	103	1	94
YJL100W	LSB6	10	237259	239082	1	0	3.38714	84	2	29	64
YJL099W	CHS6	10	239410	241650	1	0	4.35383	74	2	28	63
YJL095W	BCK1	10	247250	251686	1	0	10.964	172	1	43
YJL092W	SRS2	10	257418	260942	1	0	6.3614	87	1	43
YJL085W	EXO70	10	272822	274693	1	0	3.08796	44	1	41
YJL084C	ALY2	10	274857	277997	0	0	8.07712	100	1	43
YJL083W	TAX4	10	278836	280650	1	0	5.19113	100	1	70
YJL082W	IML2	10	281180	283375	1	0	5.0787	102	1	71
YJL080C	SCP160	10	285553	289221	0	0	13.7563	122	1	70
YJL078C	PRY3	10	291331	293976	0	0	15.424	191	3	72	171	181
YJL076W	NET1	10	295240	298809	1	0	10.9932	148	2	53	102
YJL074C	SMC3	10	299152	302844	0	0	9.0792	80	2	23	73
YJL072C	PSF2	10	305216	305857	0	0	3.44063	24	1	14
YJL071W	ARG2	10	306127	307851	1	0	44.361	61	1	53
YJL070C		10	307966	310632	0	0	4.12613	37	2	11	26
YJL069C	UTP18	10	310917	312701	0	0	4.63226	62	1	57
YJL062W	LAS21	10	317279	319771	1	0	8.9346	122	1	61
YJL056C	ZAP1	10	330426	333068	0	0	5.80781	104	1	85
YJL047C	RTT101	10	349575	352103	0	0	5.11452	58	1	17
YJL042W	MHP1	10	361244	365440	1	0	17.8506	197	1	135
YJL039C	NUP192	10	368743	373794	0	0	7.92192	115	1	56
YJL033W	HCA4	10	383832	386144	1	0	3.53532	73	1	70
YJL020C	BBC1	10	398932	402405	0	0	18.0134	174	2	56	98
YJL010C	NOP9	10	417556	419556	0	0	4.87083	51	2	22	45
YJL005W	CYR1	10	425151	431231	1	0	46.0562	216	2	73	124
YJL001W	PRE3	10	435157	435920	1	0	3.64261	20	1	17
YJR003C		10	440987	442546	0	0	3.43033	18	1	13
YJR004C	SAG1	10	442902	444854	0	0	91.7618	72	2	56	68
YJR015W		10	462714	464246	1	0	9.433	68	2	14	63
YJR032W	CPR7	10	491074	492255	1	0	9.591	25	1	23
YJR033C	RAV1	10	492371	496444	0	0	3.13159	136	2	59	116
YJR035W	RAD26	10	497348	500605	1	0	24.9781	93	1	47
YJR036C	HUL4	10	500706	503384	0	0	12.3416	49	1	21
YJR039W		10	503929	507294	1	0	9.06132	93	1	49
YJR048W	CYC1	10	526328	526657	1	0	8.9768	10	1	6
YJR049C	UTR1	10	526877	528469	0	0	34.2483	69	1	53
YJR059W	PTK2	10	545780	548236	1	0	3.90069	92	1	51
YJR061W		10	550504	553311	1	0	3.41665	91	1	45
YJR065C	ARP3	10	557802	559151	0	0	12.0704	67	1	60
YJR066W	TOR1	10	559409	566821	1	0	16.802	270	3	48	141	251
YJR068W	RFC2	10	567636	568697	1	0	3.68667	37	1	27
YJR072C	NPA3	10	570960	572117	0	0	11.5119	68	1	62
YJR074W	MOG1	10	573088	573744	1	0	5.18811	40	1	29
YJR077C	MIR1	10	577248	578183	0	0	5.12091	59	1	48
YJR084W	CSN12	10	583726	584997	1	0	12.7244	61	1	49
YJR091C	JSN1	10	595054	598329	0	0	5.44925	129	3	38	65	121
YJR092W	BUD4	10	598728	603074	1	0	3.87941	143	3	13	80	136
YJR103W	URA8	10	620747	622441	1	0	3.33623	112	1	38
YJR105W	ADO1	10	623573	624595	1	0	41.9868	60	1	53
YJR106W	ECM27	10	624830	627007	1	0	3.26936	69	1	44
YJR107W		10	627333	628319	1	0	3.22292	26	1	24
YJR109C	CPA2	10	629579	632935	0	0	15.6524	128	2	27	55
YJR112W	NNF1	10	637024	637629	1	0	3.14683	36	1	25
YJR127C	RSF2	10	658911	663053	0	0	12.6292	169	2	23	49
YJR137C	ECM17	10	678951	683279	0	0	31.7983	157	3	73	93	146
YJR138W	IML1	10	684561	689315	1	0	8.40759	98	2	32	91
YJR139C	HOM6	10	689439	690518	0	0	7.17336	49	1	41
YJR140C	HIR3	10	690744	695690	0	0	10.3324	113	1	45
YJR145C	RPS4A	10	702021	703062	0	0	3.64244	24	1	17
YJR151C	DAN4	10	712249	715734	0	0	18.2369	190	3	33	81	157
YJR152W	DAL5	10	719660	721291	1	0	12.3422	67	1	57
YKL220C	FRE2	11	9092	11227	0	0	18.1223	83	2	47	67
YKL217W	JEN1	11	22234	24084	1	0	22.5514	97	1	67
YKL215C		11	26828	30688	0	0	32.9603	146	2	38	62
YKL210W	UBA1	11	39164	42238	1	0	7.92889	144	1	73
YKL209C	STE6	11	42424	46296	0	0	27.6571	129	1	55
YKL204W	EAP1	11	53705	55603	1	0	3.00276	83	1	60
YKL203C	TOR2	11	55936	63360	0	0	19.1899	244	3	44	86	155
YKL188C	PXA2	11	86230	88791	0	0	17.1633	59	1	45
YKL187C		11	89289	91541	0	0	20.4852	141	2	90	117
YKL184W	SPE1	11	96762	98162	1	0	3.17425	59	1	38
YKL182W	FAS1	11	100676	106831	1	0	10.6622	296	3	39	134	206
YKL179C	COY1	11	110469	112508	0	0	3.37895	49	1	15
YKL176C	LST4	11	115505	117991	0	0	4.56093	113	1	70
YKL175W	ZRT3	11	118798	120309	1	0	7.70467	80	1	63
YKL174C	TPO5	11	120385	122241	0	0	3.00903	68	1	25
YKL171W		11	127480	130266	1	0	12.6193	124	2	41	103
YKL168C	KKQ8	11	131293	133467	0	0	11.7806	100	1	35
YKL157W	APE2	11	154996	158186	1	0	8.08198	108	2	16	53
YKL148C	SDH1	11	169212	171134	0	0	8.44282	126	2	76	100
YKL146W	AVT3	11	171788	173866	1	0	8.34805	110	2	37	66
YKL134C	39722	11	189129	191441	0	0	4.43527	77	2	16	53
YKL129C	MYO3	11	196348	200163	0	0	38.1689	155	2	70	86
YKL125W	RRN3	11	207891	209774	1	0	4.17539	64	1	21
YKL124W	SSH4	11	210237	211976	1	0	7.53955	51	1	24
YKL121W		11	213786	216344	1	0	7.18606	85	2	23	62
YKL105C		11	238829	242227	0	0	14.8311	166	2	45	125
YKL104C	GFA1	11	242864	245017	0	0	7.2069	91	1	35
YKL103C	LAP4	11	245782	247326	0	0	4.10049	84	1	37
YKL101W	HSL1	11	248564	253120	1	0	9.94948	152	1	105
YKL092C	BUD2	11	265789	269103	0	0	10.1449	60	1	29
YKL089W	MIF2	11	273038	274687	1	0	3.4287	62	1	32
YKL088W		11	274927	276642	1	0	4.88961	92	1	61
YKL064W	MNR2	11	317408	320317	1	0	9.13164	124	3	17	42	94
YKL054C	DEF1	11	336181	338397	0	0	4.97224	93	1	74
YKL051W	SFK1	11	340956	342017	1	0	5.23518	54	1	15
YKL050C		11	342496	345264	0	0	18.5521	143	3	28	81	128
YKL038W	RGT1	11	365248	368760	1	0	9.42697	171	2	32	97
YKL033W		11	375099	378215	1	0	4.46562	72	1	47
YKL032C	IXR1	11	379708	381501	0	0	5.53203	103	1	44
YKL027W		11	387205	388548	1	0	3.58065	56	1	13
YKL022C	CDC16	11	394369	396891	0	0	6.4905	119	1	45
YKL020C	SPT23	11	398475	401723	0	0	10.0843	121	1	79
YKL015W	PUT3	11	408187	411126	1	0	3.86129	68	1	51
YKL010C	UFD4	11	421067	425518	0	0	12.9666	139	2	22	62
YKL005C	BYE1	11	432736	434520	0	0	3.77511	70	1	30
YKR009C	FOX2	11	453995	456697	0	0	4.93839	121	1	55
YKR018C		11	473366	475543	0	0	8.3808	99	1	21
YKR019C	IRS4	11	475859	477706	0	0	9.04174	118	1	102
YKR028W	SAP190	11	493900	497196	1	0	5.9398	124	1	67
YKR031C	SPO14	11	500986	506037	0	0	18.697	148	2	12	91
YKR036C	CAF4	11	508344	510275	0	0	5.92671	68	1	64
YKR046C	PET10	11	523865	524716	0	0	4.9425	60	2	17	49
YKR050W	TRK2	11	527457	530126	1	0	18.3236	153	1	99
YKR054C	DYN1	11	535289	547567	0	0	16.1433	315	3	70	212	292
YKR056W	TRM2	11	549090	551009	1	0	5.56888	57	1	5
YKR058W	GLG1	11	552412	554262	1	0	5.54268	61	2	15	51
YKR063C	LAS1	11	560431	561939	0	0	10.3539	53	2	10	27
YKR069W	MET1	11	571254	573035	1	0	4.91413	81	2	13	48
YKR086W	PRP16	11	599499	602714	1	0	4.89606	92	2	42	73
YKR089C	TGL4	11	605275	608007	0	0	7.66615	102	2	23	76
YKR090W	PXL1	11	608588	610708	1	0	4.90066	94	1	46
YKR093W	PTR2	11	615372	617177	1	0	6.76278	70	1	19
YKR095W	MLP1	11	619447	625074	1	0	10.4284	84	1	41
YKR097W	PCK1	11	630790	632439	1	0	6.02213	93	2	28	54
YKR099W	BAS1	11	635489	637924	1	0	5.05826	121	1	61
YKR105C	VBA5	11	658354	660102	0	0	5.62949	18	1	3
YLL056C		12	27409	28305	0	0	4.89999	50	1	25
YLL048C	YBT1	12	41279	46264	0	0	12.0178	147	2	49	99
YLL043W	FPS1	12	49937	51946	1	0	4.41718	109	1	82
YLL040C	VPS13	12	54210	63644	0	0	41.4152	265	4	34	79	119	178
YLL031C	GPI13	12	77151	80204	0	0	4.1714	86	1	49
YLL029W	FRA1	12	81460	83709	1	0	8.03323	120	1	49
YLL028W	TPO1	12	84803	86563	1	0	9.20932	106	3	17	60	100
YLL026W	HSP104	12	88622	91348	1	0	8.38354	143	3	23	89	135
YLL024C	SSA2	12	95565	97484	0	0	5.65024	59	1	42
YLL021W	SPA2	12	100946	105346	1	0	14.6336	210	3	61	90	147
YLL019C	KNS1	12	105685	107898	0	0	11.6406	95	2	36	81
YLL015W	BPT1	12	116431	121110	1	0	10.0917	124	2	32	81
YLL010C	PSR1	12	129329	130612	0	0	3.5846	65	1	48
YLL003W	SFI1	12	143200	146040	1	0	6.33347	72	1	26
YLR001C		12	151388	153976	0	0	3.50705	70	1	42
YLR004C	THI73	12	157933	159504	0	0	3.91727	68	1	37
YLR006C	SSK1	12	161754	163892	0	0	13.0488	95	1	49
YLR014C	PPR1	12	172267	174981	0	0	9.66146	91	1	59
YLR019W	PSR2	12	180287	181480	1	0	3.23541	65	1	21
YLR024C	UBR2	12	187664	193282	0	0	10.4037	117	1	78
YLR028C	ADE16	12	199541	201316	0	0	3.85182	97	1	27
YLR032W	RAD5	12	204992	208501	1	0	10.4024	101	3	42	59	90
YLR035C	MLH2	12	212370	214457	0	0	4.53911	60	2	18	39
YLR040C		12	228909	229583	0	0	4.23036	36	2	21	31
YLR045C	STU2	12	235038	237704	0	0	8.87193	109	1	41
YLR047C	FRE8	12	239348	241408	0	0	3.08541	69	1	60
YLR055C	SPT8	12	251273	253081	0	0	7.35793	88	1	34
YLR057W		12	255307	257856	1	0	3.17521	93	1	9
YLR084C	RAX2	12	296590	300252	0	0	4.68315	129	2	20	89
YLR087C	CSF1	12	306856	315732	0	0	35.8093	255	3	50	157	176
YLR095C	IOC2	12	329678	332116	0	0	7.93461	120	1	71
YLR096W	KIN2	12	332591	336034	1	0	12.9011	141	2	57	118
YLR098C	CHA4	12	337528	339474	0	0	3.46243	54	1	46
YLR106C	MDN1	12	349007	363739	0	0	27.7013	450	8	74	122	147	226	295	320	395	418
YLR115W	CFT2	12	377986	380565	1	0	6.29666	77	1	55
YLR120C	YPS1	12	386512	388221	0	0	10.7425	89	2	42	66
YLR121C	YPS3	12	388745	390271	0	0	3.5781	96	1	86
YLR127C	APC2	12	395759	398320	0	0	11.463	58	1	27
YLR133W	CKI1	12	408446	410194	1	0	4.12211	78	1	33
YLR134W	PDC5	12	410724	412415	1	0	12.3287	100	1	59
YLR135W	SLX4	12	413282	415528	1	0	9.00317	76	1	34
YLR138W	NHA1	12	418438	421395	1	0	3.39917	141	1	80
YLR144C	ACF2	12	429678	432017	0	0	3.32266	84	1	28
YLR148W	PEP3	12	434642	437398	1	0	3.40771	42	1	21
YLR149C		12	437632	439824	0	0	6.62726	87	2	17	64
YLR152C		12	442959	444689	0	0	5.089	53	1	40
YLR176C	RFX1	12	507799	510234	0	0	4.28306	70	1	6
YLR177W		12	511056	512942	1	0	3.8592	75	1	50
YLR187W	SKG3	12	524867	527947	1	0	32.3062	137	3	37	59	97
YLR207W	HRD3	12	556790	559291	1	0	3.51439	118	2	11	73
YLR219W	MSC3	12	574153	576339	1	0	7.51703	117	1	38
YLR223C	IFH1	12	582235	585492	0	0	3.75024	106	1	24
YLR228C	ECM22	12	600021	602465	0	0	8.48375	111	2	10	40
YLR233C	EST1	12	607427	609526	0	0	5.01816	52	1	35
YLR234W	TOP3	12	609785	611755	1	0	20.1692	121	2	43	63
YLR237W	THI7	12	612369	614165	1	0	7.03562	100	1	52
YLR240W	VPS34	12	617535	620162	1	0	5.79539	69	1	17
YLR241W		12	620475	622823	1	0	5.56514	96	1	74
YLR247C	IRC20	12	628686	633356	0	0	8.1594	121	3	32	61	115
YLR249W	YEF3	12	636782	639916	1	0	9.27454	189	2	38	114
YLR256W	HAP1	12	646417	650925	1	0	20.0396	198	2	74	141
YLR258W	GSY2	12	660718	662835	1	0	9.17454	100	2	20	51
YLR260W	LCB5	12	665846	667909	1	0	7.91319	86	1	57
YLR263W	RED1	12	670342	672825	1	0	3.49292	49	1	14
YLR272C	YCS4	12	683674	687204	0	0	13.0004	88	1	28
YLR273C	PIG1	12	689085	691031	0	0	3.78297	46	1	28
YLR278C		12	700001	704026	0	0	121.218	181	5	44	66	96	131	172
YLR288C	MEC3	12	713482	714906	0	0	4.19917	55	1	35
YLR300W	EXG1	12	728957	730303	1	0	5.82957	67	1	41
YLR305C	STT4	12	738163	743865	0	0	9.00053	168	2	24	126
YLR309C	IMH1	12	749036	751771	0	0	5.78789	56	1	50
YLR310C	CDC25	12	752226	756995	0	0	4.3738	112	3	24	52	76
YLR312C		12	757639	758835	0	0	3.84527	40	1	31
YLR318W	EST2	12	766542	769196	1	0	8.44927	40	1	24
YLR319C	BUD6	12	769318	771684	0	0	8.98228	79	1	20
YLR320W	MMS22	12	771940	776304	1	0	26.9051	109	2	32	66
YLR324W	PEX30	12	779215	780786	1	0	4.93974	78	1	58
YLR337C	VRP1	12	802653	805106	0	0	21.0907	122	2	54	75
YLR342W	FKS1	12	809997	815627	1	0	15.8174	225	3	51	116	157
YLR347C	KAP95	12	823827	826412	0	0	7.06171	143	1	47
YLR352W		12	831115	833538	1	0	17.2857	72	1	33
YLR353W	BUD8	12	834351	836162	1	0	4.60788	96	2	41	77
YLR362W	STE11	12	849865	852018	1	0	9.02538	60	1	37
YLR368W	MDM30	12	857539	859335	1	0	5.70437	47	1	37
YLR371W	ROM2	12	862713	866783	1	0	37.4504	172	2	104	115
YLR373C	VID22	12	868661	871366	0	0	16.8225	92	1	24
YLR377C	FBP1	12	873745	874791	0	0	4.77804	67	1	37
YLR378C	SEC61	12	875735	877177	0	0	4.74589	86	1	37
YLR381W	CTF3	12	879723	881924	1	0	4.67032	80	2	61	76
YLR383W	SMC6	12	885288	888632	1	0	7.06326	79	1	52
YLR384C	IKI3	12	888851	892900	0	0	12.4327	173	1	90
YLR386W	VAC14	12	893628	896270	1	0	16.267	83	1	72
YLR389C	STE23	12	899577	902660	0	0	15.9829	114	1	33
YLR398C	SKI2	12	915156	919019	0	0	8.59528	107	2	19	40
YLR403W	SFP1	12	925567	927618	1	0	4.93982	87	1	37
YLR410W	VIP1	12	937539	940979	1	0	4.72956	103	1	54
YLR413W		12	951153	953180	1	0	7.39052	112	1	80
YLR419W		12	958425	962732	1	0	7.93786	116	1	93
YLR422W		12	965894	971692	1	0	9.89475	181	3	66	91	142
YLR424W	SPP382	12	973392	975518	1	0	7.09193	58	1	43
YLR427W	MAG2	12	988425	990437	1	0	3.16135	91	3	10	47	79
YLR430W	SEN1	12	993431	1000126	1	0	28.1785	223	3	26	106	162
YLR431C	ATG23	12	1000339	1001700	0	0	4.05442	48	1	18
YLR436C	ECM30	12	1007418	1011242	0	0	13.1653	121	1	49
YLR439W	MRPL4	12	1014488	1015447	1	0	4.39851	66	1	14
YLR442C	SIR3	12	1019312	1022248	0	0	17.7062	77	2	27	40
YLR450W	HMG2	12	1032624	1035761	1	0	9.13139	107	2	36	70
YLR454W		12	1043996	1051882	1	0	13.8153	117	2	33	83
YML128C	MSC1	13	15136	16677	0	0	7.11413	79	1	49
YML127W	RSC9	13	17065	18810	1	0	5.50232	101	1	52
YML124C	TUB3	13	22049	23684	0	0	3.38357	94	2	52	88
YML117W	NAB6	13	34243	37647	1	0	20.4716	119	2	41	67
YML111W	BUL2	13	46942	49704	1	0	3.00258	83	1	56
YML109W	ZDS2	13	51640	54468	1	0	13.7785	129	2	58	104
YML104C	MDM1	13	58939	62322	0	0	4.40729	70	1	46
YML100W	TSL1	13	70624	73920	1	0	21.4198	184	3	25	51	105
YML091C	RPM2	13	87123	90731	0	0	3.68146	53	1	15
YML088W	UFO1	13	92235	94241	1	0	6.66171	89	1	43
YML081W		13	104777	108532	1	0	5.90423	119	2	52	88
YML075C	HMG1	13	115734	118898	0	0	8.71366	126	1	92
YML072C	TCB3	13	124730	129367	0	0	45.7453	172	3	56	79	111
YML071C	COG8	13	129749	131572	0	0	4.7984	43	1	17
YML065W	ORC1	13	142210	144954	1	0	11.5642	76	1	49
YML061C	PIF1	13	148953	151532	0	0	23.8222	94	2	33	65
YML059C	NTE1	13	153219	158258	0	0	27.0684	232	3	18	60	121
YML054C	CYB2	13	165533	167308	0	0	14.0748	89	2	27	56
YML049C	RSE1	13	174220	178305	0	0	3.0368	133	3	20	59	127
YML031C-A		13	214086	214421	0	0	3.03172	23	1	9
YML029W	USA1	13	217362	219878	1	0	12.9801	113	1	55
YML027W	YOX1	13	221406	222563	1	0	5.12006	72	1	68
YML023C	NSE5	13	226994	228664	0	0	9.39209	53	1	39
YML017W	PSP2	13	236588	238731	1	0	7.20303	66	1	50
YML010W	SPT5	13	247677	250868	1	0	5.23443	140	1	69
YML002W		13	264541	266754	1	0	9.4154	37	1	17
YMR005W	TAF4	13	276045	277211	1	0	3.55998	56	1	10
YMR006C	PLB2	13	277561	279681	0	0	3.35138	132	1	39
YMR008C	PLB1	13	280590	282584	0	0	3.98786	91	1	22
YMR012W	CLU1	13	291133	294966	1	0	10.5481	100	2	39	75
YMR016C	SOK2	13	303235	305592	0	0	6.27613	134	2	53	101
YMR019W	STB4	13	312155	315004	1	0	5.62168	94	2	13	63
YMR031C		13	332211	334742	0	0	7.98325	112	1	51
YMR032W	HOF1	13	335297	337306	1	0	3.0272	91	1	12
YMR037C	MSN2	13	344402	346516	0	0	3.67656	75	1	20
YMR041C	ARA2	13	350965	351972	0	0	3.31077	50	1	40
YMR047C	NUP116	13	363363	366704	0	0	13.3363	170	2	63	151
YMR049C	ERB1	13	368093	370516	0	0	8.47072	97	1	68
YMR054W	STV1	13	383302	385974	1	0	13.946	120	2	34	66
YMR058W	FET3	13	388821	390731	1	0	7.13551	136	1	77
YMR066W	SOV1	13	401540	404236	1	0	4.68446	44	1	30
YMR076C	PDS5	13	416195	420028	0	0	14.5491	64	1	23
YMR086W		13	439207	442089	1	0	7.26863	114	1	10
YMR089C	YTA12	13	445608	448085	0	0	6.55774	109	1	63
YMR096W	SNZ1	13	458407	459300	1	0	4.58409	58	1	12
YMR102C		13	469847	472351	0	0	10.8281	125	2	46	95
YMR104C	YPK2	13	473419	475452	0	0	8.88719	79	1	52
YMR106C	YKU80	13	478300	480189	0	0	4.69665	77	1	28
YMR108W	ILV2	13	484083	486146	1	0	3.06162	128	1	89
YMR109W	MYO5	13	486586	490245	1	0	10.2559	132	2	40	88
YMR116C	ASC1	13	499455	500687	0	0	3.1804	74	1	33
YMR128W	ECM16	13	523695	527498	1	0	14.0612	126	3	21	68	82
YMR129W	POM152	13	527803	531816	1	0	6.73186	99	2	23	76
YMR154C	RIM13	13	565998	568181	0	0	5.63501	61	1	18
YMR162C	DNF3	13	578950	583920	0	0	9.06164	176	3	68	102	153
YMR165C	PAH1	13	590039	592627	0	0	8.92955	121	1	65
YMR168C	CEP3	13	597331	599157	0	0	7.7559	57	1	43
YMR176W	ECM5	13	611739	615974	1	0	17.3844	95	1	27
YMR179W	SPT21	13	619857	622133	1	0	4.51666	73	1	35
YMR189W	GCV2	13	637499	640603	1	0	13.1659	136	2	44	78
YMR190C	SGS1	13	640914	645257	0	0	7.88639	185	3	52	113	172
YMR205C	PFK2	13	671886	674765	0	0	4.13612	182	2	41	130
YMR207C	HFA1	13	677192	683563	0	0	8.06976	239	2	79	161
YMR213W	CEF1	13	693380	695152	1	0	3.20105	94	2	8	45
YMR219W	ESC1	13	707132	712108	1	0	23.54	190	2	97	152
YMR229C	RRP5	13	725933	731122	0	0	8.89184	139	3	21	80	111
YMR231W	PEP5	13	733544	736633	1	0	7.09065	65	1	33
YMR236W	TAF9	13	742970	743443	1	0	3.05237	33	1	5
YMR246W	FAA4	13	759806	761890	1	0	8.28687	124	1	84
YMR247C	RKR1	13	763350	768038	0	0	12.2494	82	2	34	54
YMR250W	GAD1	13	770800	772557	1	0	4.40302	85	1	54
YMR251W	GTO3	13	772914	774014	1	0	4.07393	80	1	36
YMR259C		13	784620	788882	0	0	4.2912	79	2	12	38
YMR261C	TPS3	13	790204	793368	0	0	18.3651	137	3	44	62	120
YMR266W	RSN1	13	798517	801378	1	0	4.22887	82	1	35
YMR273C	ZDS1	13	811232	813979	0	0	5.48787	125	1	81
YMR275C	BUL1	13	815650	818580	0	0	8.05041	89	2	21	41
YMR277W	FCP1	13	820255	822453	1	0	7.6917	106	1	67
YMR280C	CAT8	13	827027	831328	0	0	8.74364	147	4	16	84	112	134
YMR285C	NGL2	13	840143	841690	0	0	3.08615	53	1	25
YMR288W	HSH155	13	845570	848485	1	0	6.67483	118	1	26
YMR291W		13	852629	854389	1	0	3.85267	86	1	26
YMR301C	ATM1	13	867554	869626	0	0	3.29507	97	1	36
YMR302C	YME2	13	870072	872624	0	0	5.59656	104	1	57
YMR303C	ADH2	13	873290	874336	0	0	5.1309	59	1	29
YMR304W	UBP15	13	874986	878678	1	0	19.0268	136	3	61	85	121
YMR306W	FKS3	13	881158	886515	1	0	22.4122	171	1	118
YMR308C	PSE1	13	888951	892220	0	0	9.27217	129	2	43	84
YMR317W		13	907362	910784	1	0	8.62867	179	2	35	162
YNL329C	PEX6	14	19541	22633	0	0	7.07136	114	1	40
YNL327W	EGT2	14	24047	27172	1	0	12.7347	160	3	38	99	148
YNL325C	FIG4	14	28738	31377	0	0	6.23775	63	1	45
YNL321W	VNX1	14	34695	37421	1	0	9.63017	154	1	113
YNL308C	KRI1	14	54121	55896	0	0	5.08715	59	1	32
YNL302C	RPS19B	14	61958	62943	0	0	4.09013	25	1	20
YNL298W	CLA4	14	68915	71443	1	0	3.79588	117	2	22	65
YNL297C	MON2	14	71673	76583	0	0	6.6178	77	1	20
YNL295W		14	76946	78520	1	0	4.85235	45	1	39
YNL293W	MSB3	14	80640	82541	1	0	7.46979	76	1	64
YNL282W	POP3	14	107687	108274	1	0	5.26668	42	1	8
YNL279W	PRM1	14	110917	112902	1	0	4.70628	122	1	91
YNL278W	CAF120	14	113271	116453	1	0	14.7139	138	2	33	82
YNL273W	TOF1	14	122883	126599	1	0	35.1371	103	1	51
YNL271C	BNI1	14	129523	135384	0	0	11.6872	216	1	67
YNL267W	PIK1	14	140879	144079	1	0	5.94543	112	1	62
YNL262W	POL2	14	148213	154881	1	0	40.7726	205	6	12	48	80	117	136	174
YNL257C	SIP3	14	160632	164321	0	0	4.57447	84	1	22
YNL254C		14	168044	169249	0	0	4.37931	35	1	33
YNL250W	RAD50	14	175411	179349	1	0	14.0858	63	1	47
YNL249C	MPA43	14	179395	181023	0	0	3.28992	51	1	34
YNL243W	SLA2	14	188052	190958	1	0	25.7727	203	1	100
YNL242W	ATG2	14	191325	196103	1	0	19.6261	137	2	40	89
YNL241C	ZWF1	14	196427	197944	0	0	4.66564	84	1	36
YNL237W	YTP1	14	205189	206568	1	0	6.8811	66	3	10	31	54
YNL203C		14	259440	260051	0	0	3.31808	37	1	10
YNL195C		14	271524	272309	0	0	6.35356	56	1	18
YNL194C		14	272711	273616	0	0	5.84065	49	1	40
YNL192W	CHS1	14	276503	279898	1	0	15.0862	89	2	50	72
YNL183C	NPR1	14	293139	295511	0	0	3.29333	110	1	60
YNL172W	APC1	14	310638	315884	1	0	23.9841	170	4	41	87	114	157
YNL167C	SKO1	14	319418	321361	0	0	3.33853	66	1	10
YNL163C	RIA1	14	326743	330075	0	0	21.3392	130	1	81
YNL162W	RPL42A	14	331324	332156	1	0	6.47952	31	1	12
YNL144C		14	352822	355044	0	0	6.91845	107	1	25
YNL142W	MEP2	14	357455	358954	1	0	3.14199	98	1	12
YNL139C	THO2	14	360926	365719	0	0	6.34154	89	1	46
YNL132W	KRE33	14	375323	378493	1	0	6.53719	112	1	67
YNL127W	FAR11	14	383989	386850	1	0	4.15576	81	1	49
YNL124W	NAF1	14	392894	394372	1	0	10.8841	96	2	16	67
YNL123W	NMA111	14	394687	397680	1	0	6.77062	113	1	54
YNL106C	INP52	14	420946	424497	0	0	13.6677	134	1	58
YNL102W	POL1	14	430089	434495	1	0	15.8122	139	2	56	95
YNL101W	AVT4	14	435001	437142	1	0	5.24002	68	1	61
YNL095C		14	444914	446842	0	0	10.7696	102	1	68
YNL091W	NST1	14	452410	456132	1	0	38.1885	147	1	64
YNL088W	TOP2	14	457706	461992	1	0	5.51439	82	2	14	55
YNL087W	TCB2	14	462413	465949	1	0	6.3713	88	2	17	55
YNL082W	PMS1	14	473392	476013	1	0	3.47861	55	1	39
YNL079C	TPM1	14	478567	479166	0	0	3.0538	49	1	18
YNL068C	FKH2	14	495702	498290	0	0	3.28063	118	2	64	106
YNL063W	MTQ1	14	507759	508703	1	0	3.25049	55	1	49
YNL059C	ARP5	14	512669	514936	0	0	8.23719	61	1	58
YNL054W	VAC7	14	526087	529584	1	0	3.78228	147	3	12	59	109
YNL053W	MSG5	14	529943	531412	1	0	4.6166	72	1	22
YNL049C	SFB2	14	535282	537912	0	0	8.28553	105	1	44
YNL034W		14	570478	572316	1	0	43.428	74	1	46
YNL020C	ARK1	14	595624	597540	0	0	10.8607	78	2	10	45
YNL018C		14	599937	601775	0	0	32.0426	80	1	37
YNL014W	HEF3	14	606320	609454	1	0	9.62553	136	1	64
YNR002C	ATO2	14	633010	633858	0	0	5.08586	58	1	37
YNR008W	LRO1	14	640398	642383	1	0	5.35374	89	1	18
YNR011C	PRP2	14	644322	646952	0	0	64.2399	88	2	34	41
YNR013C	PHO91	14	649030	651714	0	0	27.2123	157	2	51	76
YNR014W		14	652467	653105	1	0	3.26465	40	1	8
YNR016C	ACC1	14	654675	661376	0	0	6.08804	324	5	126	155	183	225	268
YNR031C	SSK2	14	680696	685435	0	0	10.7722	152	2	45	120
YNR044W	AGA1	14	703701	705878	1	0	5.30847	167	2	11	35
YNR051C	BRE5	14	716782	718329	0	0	3.01671	62	1	31
YNR055C	HOL1	14	728427	730187	0	0	7.5998	91	1	27
YNR056C	BIO5	14	731618	733303	0	0	3.34388	82	2	20	56
YNR057C	BIO4	14	733356	734069	0	0	4.379	41	1	31
YNR058W	BIO3	14	734291	735733	1	0	5.6905	86	1	66
YNR062C		14	744360	745343	0	0	7.86228	37	2	16	26
YNR065C		14	750350	753700	0	0	16.9208	96	2	23	49
YNR067C	DSE4	14	755746	759099	0	0	10.9935	122	2	59	116
YNR070W		14	765375	769376	1	0	21.8103	180	3	40	88	169
YNR074C	AIF1	14	777602	778738	0	0	3.08849	44	1	4
YOL164W	BDS1	15	6175	8115	1	0	4.39222	120	2	34	69
YOL158C	ENB1	15	19490	21310	0	0	4.31989	116	2	52	100
YOL157C		15	22524	24293	0	0	3.46699	45	1	12
YOL155C	HPF1	15	28702	31605	0	0	19.5934	190	3	15	90	152
YOL138C		15	61325	65350	0	0	24.0567	165	1	75
YOL130W	ALR1	15	74400	76979	1	0	8.03159	133	1	106
YOL125W	TRM13	15	83834	85264	1	0	3.13871	69	1	29
YOL121C	RPS19A	15	92026	92850	0	0	3.45224	27	1	22
YOL117W	RRI2	15	97551	99488	1	0	3.81074	45	2	19	38
YOL113W	SKM1	15	104326	106293	1	0	3.06591	78	1	12
YOL103W	ITR2	15	124001	125830	1	0	5.81803	69	1	40
YOL098C		15	132725	135838	0	0	17.1914	97	2	36	51
YOL087C		15	155287	158637	0	0	15.8293	131	2	49	79
YOL084W	PHM7	15	162356	165331	1	0	11.937	171	2	17	79
YOL081W	IRA2	15	171070	180309	1	0	29.1344	255	5	68	107	125	174	227
YOL078W	AVO1	15	181682	185212	1	0	20.8884	113	1	25
YOL075C		15	189658	193542	0	0	15.6404	117	2	54	110
YOL066C	RIB2	15	202696	204471	0	0	5.0039	109	1	87
YOL063C	CRT10	15	207392	210265	0	0	4.14655	113	1	66
YOL060C	MAM3	15	214017	216137	0	0	8.38738	101	1	55
YOL055C	THI20	15	224419	226074	0	0	22.5393	75	1	49
YOL051W	GAL11	15	234939	238184	1	0	5.08105	148	1	104
YOL045W	PSK2	15	243496	246801	1	0	3.62037	47	1	15
YOL034W	SMC5	15	259924	263205	1	0	6.27234	84	3	23	47	75
YOL021C	DIS3	15	282422	285427	0	0	3.67669	149	1	36
YOL019W		15	288899	290554	1	0	5.25714	70	1	38
YOL011W	PLB3	15	305350	307410	1	0	7.02921	99	2	11	58
YOL004W	SIN3	15	316939	321549	1	0	11.7301	181	2	40	126
YOR011W	AUS1	15	349679	353863	1	0	11.9098	145	2	54	118
YOR027W	STI1	15	381053	382822	1	0	4.98538	97	1	11
YOR032C	HMS1	15	389771	391075	0	0	8.02109	50	1	18
YOR035C	SHE4	15	397735	400104	0	0	3.29325	72	1	37
YOR038C	HIR2	15	402761	405388	0	0	4.45574	71	1	31
YOR040W	GLO4	15	407064	407921	1	0	3.05038	38	1	30
YOR049C	RSB1	15	422669	423733	0	0	4.20836	40	1	18
YOR058C	ASE1	15	433690	436347	0	0	3.74549	51	1	26
YOR070C	GYP1	15	455909	457822	0	0	3.38653	77	1	36
YOR081C	TGL5	15	476941	479190	0	0	4.40063	105	1	33
YOR086C	TCB1	15	483221	486781	0	0	22.4209	114	2	43	64
YOR092W	ECM3	15	495128	496969	1	0	6.94064	80	2	26	68
YOR093C		15	497507	502453	0	0	15.4672	89	1	60
YOR098C	NUP1	15	507949	511179	0	0	7.76587	149	1	65
YOR109W	INP53	15	525279	528602	1	0	10.5237	112	1	46
YOR113W	AZF1	15	534076	536820	1	0	5.63783	92	1	75
YOR116C	RPO31	15	539764	544146	0	0	8.74571	162	3	33	75	152
YOR124C	UBP2	15	554825	558643	0	0	8.24428	88	2	16	34
YOR127W	RGA1	15	561171	564194	1	0	8.94601	95	2	52	85
YOR129C	AFI1	15	566878	569559	0	0	9.25812	81	1	32
YOR137C	SIA1	15	581814	583682	0	0	3.67125	40	1	21
YOR138C	RUP1	15	584310	586325	0	0	26.147	143	1	68
YOR140W	SFL1	15	586982	589282	1	0	13.7326	101	2	21	36
YOR141C	ARP8	15	589943	592588	0	0	5.4736	94	1	30
YOR151C	RPB2	15	612998	616672	0	0	5.03156	122	1	76
YOR153W	PDR5	15	619841	624376	1	0	9.64284	170	1	66
YOR156C	NFI1	15	628361	630541	0	0	12.886	83	2	11	34
YOR162C	YRR1	15	639561	641993	0	0	6.22234	67	1	40
YOR181W	LAS17	15	675940	677841	1	0	3.40583	80	1	64
YOR187W	TUF1	15	684031	685344	1	0	3.01546	71	1	16
YOR188W	MSB1	15	685768	689181	1	0	13.7668	129	1	52
YOR191W	ULS1	15	692476	697335	1	0	18.5677	169	2	82	136
YOR192C	THI72	15	698769	700568	0	0	6.59415	95	1	65
YOR194C	TOA1	15	711684	712544	0	0	4.81476	25	1	20
YOR204W	DED1	15	722912	724726	1	0	4.64725	103	1	58
YOR207C	RET1	15	730009	733458	0	0	18.8867	110	1	61
YOR208W	PTP2	15	733926	736178	1	0	3.75603	48	1	32
YOR217W	RFC1	15	749302	751887	1	0	8.06384	91	1	38
YOR219C	STE13	15	752215	755010	0	0	4.06693	84	1	42
YOR227W	HER1	15	762826	766566	1	0	13.7961	113	2	68	83
YOR233W	KIN4	15	775847	778249	1	0	4.25837	115	1	50
YOR234C	RPL33B	15	778556	779406	0	0	5.65366	34	1	19
YOR256C	TRE2	15	808254	810683	0	0	3.2575	61	1	25
YOR270C	VPH1	15	828051	830573	0	0	10.4081	100	1	43
YOR273C	TPO4	15	834451	836430	0	0	9.2528	83	2	25	57
YOR291W		15	861174	865592	1	0	12.601	147	2	100	124
YOR293W	RPS10A	15	867097	867851	1	0	3.27242	25	1	17
YOR304W	ISW2	15	884512	887874	1	0	5.08209	80	1	54
YOR317W	FAA1	15	909340	911442	1	0	4.56539	88	1	27
YOR326W	MYO2	15	925718	930442	1	0	27.1171	147	2	82	107
YOR328W	PDR10	15	931800	936494	1	0	29.0964	246	6	19	43	122	141	191	211
YOR329C	SCD5	15	936728	939346	0	0	25.4672	124	3	14	69	85
YOR330C	MIP1	15	939618	943382	0	0	3.9775	148	1	22
YOR331C		15	943562	944119	0	0	6.82024	37	1	4
YOR336W	KRE5	15	949770	953867	1	0	3.16876	97	1	77
YOR341W	RPA190	15	960984	965978	1	0	13.3834	201	2	53	114
YOR348C	PUT4	15	986896	988779	0	0	11.8642	115	2	46	81
YOR353C	SOG2	15	998450	1000825	0	0	3.00973	92	1	33
YOR356W		15	1007219	1009114	1	0	3.25303	100	1	51
YOR361C	PRT1	15	1015359	1017650	0	0	5.78085	90	1	36
YOR363C	PIP2	15	1020220	1023210	0	0	16.4902	82	3	14	27	43
YOR371C	GPB1	15	1031487	1034180	0	0	6.01699	106	1	34
YOR372C	NDD1	15	1034805	1036469	0	0	3.16087	66	1	11
YOR374W	ALD4	15	1039838	1041397	1	0	5.04291	83	1	14
YOR378W		15	1049509	1051056	1	0	5.90823	82	2	35	74
YOR380W	RDR1	15	1051288	1052928	1	0	3.7702	85	1	33
YOR381W	FRE3	15	1055543	1057678	1	0	13.9008	97	2	17	35
YOR383C	FIT3	15	1060439	1061053	0	0	7.11714	44	1	39
YOR384W	FRE5	15	1061562	1063646	1	0	3.86992	109	1	58
YPL249C	GYP5	16	76669	79353	0	0	7.36577	102	1	41
YPL242C	IQG1	16	90622	95109	0	0	3.47026	90	1	37
YPL231W	FAS2	16	108652	114315	1	0	44.2703	297	3	47	157	216
YPL226W	NEW1	16	121767	125357	1	0	12.0238	131	1	69
YPL222W		16	130161	132227	1	0	3.04068	140	2	14	62
YPL221W	FLC1	16	133042	135423	1	0	9.55343	131	2	33	68
YPL217C	BMS1	16	139619	143170	0	0	7.50518	128	1	51
YPL214C	THI6	16	148568	150190	0	0	6.51857	82	1	43
YPL207W	TYW1	16	159908	162340	1	0	4.14762	92	1	41
YPL190C	NAB3	16	185316	187724	0	0	4.68379	115	1	54
YPL184C		16	195949	197787	0	0	3.17334	61	1	45
YPL180W	TCO89	16	205247	207646	1	0	4.54226	94	1	49
YPL176C	TRE1	16	216011	218362	0	0	10.7338	109	2	24	54
YPL167C	REV3	16	232592	237106	0	0	16.8664	106	1	58
YPL160W	CDC60	16	246989	250261	1	0	8.08108	131	1	63
YPL153C	RAD53	16	261726	264191	0	0	3.80737	96	1	18
YPL150W		16	268187	270892	1	0	4.38161	94	2	21	82
YPL147W	PXA1	16	273254	275866	1	0	11.9037	74	1	32
YPL137C	GIP3	16	292816	296646	0	0	8.45411	165	1	79
YPL128C	TBF1	16	306532	308220	0	0	3.23496	85	1	26
YPL125W	KAP120	16	313387	316485	1	0	3.92583	52	1	26
YPL116W	HOS3	16	329605	331698	1	0	3.24512	87	1	57
YPL115C	BEM3	16	332099	335485	0	0	9.79336	98	1	55
YPL110C	GDE1	16	341067	344738	0	0	17.6823	116	3	70	87	103
YPL109C		16	345263	347388	0	0	7.00862	70	1	24
YPL106C	SSE1	16	350191	352272	0	0	4.37229	117	2	40	105
YPL105C	SYH1	16	352860	355409	0	0	15.2026	105	2	41	59
YPL104W	MSD1	16	355697	357673	1	0	9.57438	74	2	44	59
YPL103C	FMP30	16	357997	359403	0	0	4.76377	53	1	45
YPL100W	ATG21	16	361869	363359	1	0	3.33805	42	1	15
YPL089C	RLM1	16	379117	381147	0	0	8.82234	87	1	64
YPL085W	SEC16	16	387064	393651	1	0	22.9828	302	4	113	154	222	276
YPL084W	BRO1	16	394035	396569	1	0	4.20009	52	1	24
YPL082C	MOT1	16	398477	404080	0	0	7.01275	212	1	41
YPL058C	PDR12	16	445839	450374	0	0	25.246	198	2	65	133
YPL045W	VPS16	16	467257	469653	1	0	9.24992	55	1	31
YPL040C	ISM1	16	475990	478998	0	0	5.96145	110	1	50
YPL036W	PMA2	16	482841	485684	1	0	14.9418	141	1	115
YPL029W	SUV3	16	495504	497717	1	0	3.61198	89	1	43
YPL022W	RAD1	16	506695	509997	1	0	3.25237	103	1	65
YPL017C	IRC15	16	518732	520231	0	0	3.00733	73	1	42
YPL015C	HST2	16	525807	526880	0	0	3.62539	50	1	32
YPL014W		16	527544	528689	1	0	5.50317	69	2	34	59
YPL012W	RRP12	16	529720	533406	1	0	5.79695	99	1	50
YPL009C		16	535817	538933	0	0	14.0233	80	1	34
YPL008W	CHL1	16	539382	541967	1	0	7.79497	69	2	37	51
YPL006W	NCR1	16	544628	548140	1	0	18.9589	110	3	33	55	89
YPL005W	AEP3	16	548483	550303	1	0	3.79838	40	1	15
YPR003C		16	561501	563765	0	0	11.8014	85	1	40
YPR010C	RPA135	16	577582	581193	0	0	25.0955	159	2	67	106
YPR018W	RLF2	16	594473	596293	1	0	7.67893	53	1	17
YPR019W	MCM4	16	596747	599548	1	0	14.9825	112	1	66
YPR022C		16	603908	607309	0	0	8.14505	121	1	42
YPR026W	ATH1	16	615376	619011	1	0	14.8705	116	1	52
YPR028W	YOP1	16	623524	624199	1	0	10.9393	26	1	9
YPR030W	CSR2	16	627877	631242	1	0	6.15244	141	1	102
YPR031W	NTO1	16	631512	633758	1	0	3.50259	67	1	16
YPR032W	SRO7	16	634120	637221	1	0	3.87262	134	1	75
YPR040W	TIP41	16	647302	648372	1	0	3.25077	58	1	10
YPR042C	PUF2	16	650432	653659	0	0	8.97596	123	1	32
YPR046W	MCM16	16	656796	657341	1	0	3.96659	26	1	8
YPR049C	ATG11	16	661134	664670	0	0	12.2065	82	2	25	42
YPR055W	SEC8	16	667673	670870	1	0	3.95368	46	1	24
YPR074C	TKL1	16	692793	694835	0	0	14.2437	151	2	77	103
YPR081C	GRS2	16	702112	703968	0	0	15.5774	69	1	53
YPR085C		16	708495	709826	0	0	3.75786	48	1	31
YPR089W		16	713273	715939	1	0	5.7925	78	1	36
YPR095C	SYT1	16	721035	724715	0	0	16.9088	124	1	56
YPR104C	FHL1	16	733621	736431	0	0	12.239	124	1	85
YPR105C	COG4	16	736982	739567	0	0	10.5422	63	1	28
YPR111W	DBF20	16	747304	748998	1	0	19.5445	59	1	48
YPR112C	MRD1	16	749254	751917	0	0	4.23762	99	1	33
YPR115W		16	754875	758126	1	0	26.3782	141	2	40	84
YPR117W		16	760023	767492	1	0	12.7542	174	3	46	75	93
YPR120C	CLB5	16	773873	775180	0	0	20.2768	46	1	18
YPR121W	THI22	16	778579	780297	1	0	14.2463	91	2	38	63
YPR135W	CTF4	16	799230	802013	1	0	14.5782	94	1	44
YPR155C	NCA2	16	835559	837409	0	0	3.35936	46	1	28
YPR156C	TPO3	16	837905	839773	0	0	10.7595	55	1	27
YPR160W	GPH1	16	861302	864010	1	0	7.84661	108	1	80
YPR161C	SGV1	16	864445	866418	0	0	5.40215	80	1	55
YPR164W	MMS1	16	870699	874922	1	0	7.82211	99	2	26	50
YPR171W	BSP1	16	883824	885554	1	0	3.57888	63	1	23
YPR175W	DPB2	16	888970	891039	1	0	3.79134	71	1	55
YPR181C	SEC23	16	897357	899663	0	0	5.98133	143	1	70
YPR184W	GDB1	16	902040	906650	1	0	25.5203	231	2	27	142
YPR189W	SKI3	16	912660	916958	1	0	3.25089	92	1	18
YPR192W	AQY1	16	921856	922773	1	0	5.70627	55	1	20
YPR194C	OPT2	16	924300	926933	0	0	6.68666	64	2	10	43

## Sheet: Transition Coordinates
Systematic Name	Transition Probe	Cutoff
YAL024C	Chr1:102367-102411	supF Stat 9.0
YAL024C	Chr1:103531-103580	supF Stat 9.0
YAL023C	Chr1:107830-107879	supF Stat 3.0
YAL019W	Chr1:116863-116919	supF Stat 3.0
YAL017W	Chr1:121784-121841	supF Stat 9.0
YAL017W	Chr1:123851-123907	supF Stat 9.0
YAL005C	Chr1:140116-140173	supF Stat 3.0
YAL002W	Chr1:145309-145365	supF Stat 3.0
YAL001C	Chr1:149222-149279	supF Stat 3.0
YAR007C	Chr1:157315-157364	supF Stat 3.0
YAR019C	Chr1:173027-173086	supF Stat 9.0
YAR019C	Chr1:173970-174020	supF Stat 9.0
YAR019C	Chr1:174935-174988	supF Stat 9.0
YAR042W	Chr1:192971-193015	supF Stat 3.0
YAR042W	Chr1:194049-194099	supF Stat 3.0
YAR042W	Chr1:195029-195080	supF Stat 3.0
YAR050W	Chr1:207093-207137	supF Stat 9.0
YAR050W	Chr1:207529-207573	supF Stat 9.0
YAL063C	Chr1:24894-24943	supF Stat 3.0
YAL061W	Chr1:33788-33839	supF Stat 9.0
YAL061W	Chr1:34076-34120	supF Stat 9.0
YAL061W	Chr1:34334-34391	supF Stat 9.0
YAL056W	Chr1:41100-41145	supF Stat 3.0
YAL053W	Chr1:47185-47242	supF Stat 9.0
YAL051W	Chr1:50824-50884	supF Stat 9.0
YAL048C	Chr1:53333-53382	supF Stat 3.0
YAL043C	Chr1:59975-60031	supF Stat 9.0
YAL038W	Chr1:72779-72823	supF Stat 3.0
YAL035W	Chr1:77090-77141	supF Stat 9.0
YAL035W	Chr1:78516-78572	supF Stat 9.0
YAL029C	Chr1:90662-90725	supF Stat 9.0
YAL026C	Chr1:97401-97445	supF Stat 9.0
YJL168C	Chr10:104112-104175	supF Stat 3.0
YJL165C	Chr10:108606-108650	supF Stat 9.0
YJL146W	Chr10:144177-144235	supF Stat 9.0
YJL141C	Chr10:149468-149519	supF Stat 3.0
YJL141C	Chr10:149961-150005	supF Stat 3.0
YJL141C	Chr10:150220-150277	supF Stat 3.0
YJL138C	Chr10:154552-154602	supF Stat 3.0
YJL137C	Chr10:155935-155987	supF Stat 3.0
YJL134W	Chr10:159285-159339	supF Stat 9.0
YJL130C	Chr10:166718-166769	supF Stat 9.0
YJL130C	Chr10:169255-169315	supF Stat 9.0
YJL130C	Chr10:171110-171154	supF Stat 9.0
YJL129C	Chr10:174082-174132	supF Stat 9.0
YJL129C	Chr10:175439-175496	supF Stat 9.0
YJL127C	Chr10:183951-184003	supF Stat 3.0
YJL112W	Chr10:205871-205924	supF Stat 3.0
YJL109C	Chr10:213721-213785	supF Stat 3.0
YJL109C	Chr10:215693-215739	supF Stat 3.0
YJL108C	Chr10:218412-218462	supF Stat 3.0
YJL103C	Chr10:230699-230753	supF Stat 3.0
YJL102W	Chr10:231802-231846	supF Stat 9.0
YJL102W	Chr10:233556-233613	supF Stat 9.0
YJL101C	Chr10:236160-236217	supF Stat 9.0
YJL100W	Chr10:237629-237673	supF Stat 3.0
YJL100W	Chr10:238392-238445	supF Stat 3.0
YJL099W	Chr10:240081-240127	supF Stat 3.0
YJL099W	Chr10:241274-241318	supF Stat 3.0
YJL095W	Chr10:248264-248313	supF Stat 9.0
YJL092W	Chr10:259119-259176	supF Stat 3.0
YJL085W	Chr10:274481-274538	supF Stat 3.0
YJL084C	Chr10:276610-276669	supF Stat 3.0
YJL083W	Chr10:279932-279976	supF Stat 3.0
YJL082W	Chr10:282254-282304	supF Stat 3.0
YJL080C	Chr10:287431-287485	supF Stat 9.0
YJL078C	Chr10:292216-292267	supF Stat 9.0
YJL078C	Chr10:293492-293536	supF Stat 9.0
YJL078C	Chr10:293814-293872	supF Stat 9.0
YJL076W	Chr10:296074-296118	supF Stat 9.0
YJL076W	Chr10:297067-297114	supF Stat 9.0
YJL074C	Chr10:299994-300050	supF Stat 9.0
YJL074C	Chr10:302523-302580	supF Stat 9.0
YJL072C	Chr10:305481-305537	supF Stat 3.0
YJL071W	Chr10:307668-307722	supF Stat 9.0
YJL070C	Chr10:308494-308544	supF Stat 3.0
YJL070C	Chr10:309967-310023	supF Stat 3.0
YJL069C	Chr10:312376-312433	supF Stat 3.0
YJL062W	Chr10:318246-318299	supF Stat 3.0
YJL056C	Chr10:332619-332663	supF Stat 3.0
YJL212C	Chr10:34824-34882	supF Stat 9.0
YJL047C	Chr10:350070-350119	supF Stat 3.0
YJL212C	Chr10:35331-35380	supF Stat 9.0
YJL042W	Chr10:363813-363872	supF Stat 9.0
YJL039C	Chr10:371163-371220	supF Stat 3.0
YJL033W	Chr10:385802-385858	supF Stat 3.0
YJL020C	Chr10:400064-400109	supF Stat 9.0
YJL020C	Chr10:400697-400741	supF Stat 9.0
YJL010C	Chr10:418199-418258	supF Stat 3.0
YJL010C	Chr10:419268-419320	supF Stat 3.0
YJL005W	Chr10:426274-426333	supF Stat 9.0
YJL005W	Chr10:428888-428942	supF Stat 9.0
YJL207C	Chr10:42937-42987	supF Stat 3.0
YJL001W	Chr10:435842-435899	supF Stat 3.0
YJR003C	Chr10:442205-442257	supF Stat 3.0
YJR004C	Chr10:444185-444248	supF Stat 9.0
YJR004C	Chr10:444572-444634	supF Stat 9.0
YJR015W	Chr10:463015-463065	supF Stat 9.0
YJR015W	Chr10:464133-464183	supF Stat 9.0
YJL206C	Chr10:48614-48673	supF Stat 9.0
YJR032W	Chr10:492176-492225	supF Stat 9.0
YJR033C	Chr10:493602-493658	supF Stat 3.0
YJR033C	Chr10:495829-495873	supF Stat 3.0
YJR035W	Chr10:498651-498708	supF Stat 9.0
YJR036C	Chr10:502615-502666	supF Stat 9.0
YJR039W	Chr10:505627-505686	supF Stat 9.0
YJL204C	Chr10:51127-51178	supF Stat 3.0
YJR048W	Chr10:526555-526609	supF Stat 3.0
YJR049C	Chr10:528220-528277	supF Stat 9.0
YJR059W	Chr10:547043-547099	supF Stat 3.0
YJR061W	Chr10:551670-551714	supF Stat 3.0
YJR065C	Chr10:558950-558994	supF Stat 9.0
YJR066W	Chr10:560560-560617	supF Stat 9.0
YJR066W	Chr10:563085-563129	supF Stat 9.0
YJR066W	Chr10:566075-566133	supF Stat 9.0
YJR068W	Chr10:568516-568574	supF Stat 3.0
YJR072C	Chr10:571821-571871	supF Stat 9.0
YJR074W	Chr10:573571-573624	supF Stat 3.0
YJR077C	Chr10:577962-578009	supF Stat 3.0
YJR084W	Chr10:584830-584886	supF Stat 9.0
YJR091C	Chr10:595990-596034	supF Stat 3.0
YJR091C	Chr10:596781-596831	supF Stat 3.0
YJR091C	Chr10:598035-598093	supF Stat 3.0
YJR092W	Chr10:599121-599171	supF Stat 3.0
YJR092W	Chr10:600815-600864	supF Stat 3.0
YJR092W	Chr10:602571-602627	supF Stat 3.0
YJL198W	Chr10:61689-61741	supF Stat 9.0
YJR103W	Chr10:621381-621439	supF Stat 3.0
YJL198W	Chr10:62379-62429	supF Stat 9.0
YJR105W	Chr10:624448-624499	supF Stat 9.0
YJR106W	Chr10:625886-625945	supF Stat 3.0
YJR107W	Chr10:628180-628236	supF Stat 3.0
YJR109C	Chr10:630244-630301	supF Stat 9.0
YJR109C	Chr10:630959-631015	supF Stat 9.0
YJR112W	Chr10:637446-637497	supF Stat 3.0
YJL197W	Chr10:65438-65487	supF Stat 9.0
YJR127C	Chr10:659410-659468	supF Stat 9.0
YJR127C	Chr10:660435-660491	supF Stat 9.0
YJR137C	Chr10:680676-680733	supF Stat 9.0
YJR137C	Chr10:681111-681170	supF Stat 9.0
YJR137C	Chr10:683124-683177	supF Stat 9.0
YJR138W	Chr10:686606-686662	supF Stat 3.0
YJR138W	Chr10:689127-689185	supF Stat 3.0
YJR139C	Chr10:690350-690400	supF Stat 3.0
YJR140C	Chr10:692426-692488	supF Stat 9.0
YJR145C	Chr10:702858-702917	supF Stat 3.0
YJR151C	Chr10:713006-713065	supF Stat 9.0
YJR151C	Chr10:713716-713765	supF Stat 9.0
YJR151C	Chr10:715103-715147	supF Stat 9.0
YJR152W	Chr10:721091-721150	supF Stat 9.0
YJL187C	Chr10:77286-77335	supF Stat 3.0
YJL172W	Chr10:98851-98909	supF Stat 3.0
YJL171C	Chr10:99776-99820	supF Stat 3.0
YKL182W	Chr11:101633-101689	supF Stat 9.0
YKL220C	Chr11:10330-10383	supF Stat 9.0
YKL182W	Chr11:103483-103532	supF Stat 9.0
YKL182W	Chr11:104859-104903	supF Stat 9.0
YKL220C	Chr11:10993-11052	supF Stat 9.0
YKL179C	Chr11:111104-111163	supF Stat 3.0
YKL176C	Chr11:117290-117335	supF Stat 3.0
YKL175W	Chr11:119958-120014	supF Stat 3.0
YKL174C	Chr11:120931-120975	supF Stat 3.0
YKL171W	Chr11:128111-128155	supF Stat 9.0
YKL171W	Chr11:129762-129819	supF Stat 9.0
YKL168C	Chr11:132315-132379	supF Stat 9.0
YKL157W	Chr11:155345-155403	supF Stat 3.0
YKL157W	Chr11:156698-156757	supF Stat 3.0
YKL148C	Chr11:170311-170355	supF Stat 3.0
YKL148C	Chr11:170614-170658	supF Stat 3.0
YKL146W	Chr11:172689-172734	supF Stat 3.0
YKL146W	Chr11:173084-173140	supF Stat 3.0
YKL134C	Chr11:189627-189684	supF Stat 3.0
YKL134C	Chr11:190921-190986	supF Stat 3.0
YKL129C	Chr11:197747-197805	supF Stat 9.0
YKL129C	Chr11:198105-198150	supF Stat 9.0
YKL125W	Chr11:208533-208579	supF Stat 3.0
YKL124W	Chr11:210975-211028	supF Stat 3.0
YKL121W	Chr11:214315-214377	supF Stat 3.0
YKL121W	Chr11:215410-215470	supF Stat 3.0
YKL217W	Chr11:23374-23418	supF Stat 9.0
YKL105C	Chr11:239597-239641	supF Stat 9.0
YKL105C	Chr11:241345-241399	supF Stat 9.0
YKL104C	Chr11:243629-243673	supF Stat 3.0
YKL103C	Chr11:246343-246396	supF Stat 3.0
YKL101W	Chr11:251322-251366	supF Stat 9.0
YKL092C	Chr11:267157-267213	supF Stat 9.0
YKL089W	Chr11:273840-273896	supF Stat 3.0
YKL088W	Chr11:276166-276223	supF Stat 3.0
YKL215C	Chr11:27889-27945	supF Stat 9.0
YKL215C	Chr11:28534-28590	supF Stat 9.0
YKL064W	Chr11:317738-317795	supF Stat 9.0
YKL064W	Chr11:318400-318452	supF Stat 9.0
YKL064W	Chr11:319606-319663	supF Stat 9.0
YKL054C	Chr11:337599-337648	supF Stat 3.0
YKL051W	Chr11:341154-341198	supF Stat 3.0
YKL050C	Chr11:342972-343021	supF Stat 9.0
YKL050C	Chr11:344151-344201	supF Stat 9.0
YKL050C	Chr11:344928-344972	supF Stat 9.0
YKL038W	Chr11:365881-365937	supF Stat 9.0
YKL038W	Chr11:367389-367440	supF Stat 9.0
YKL033W	Chr11:377489-377547	supF Stat 3.0
YKL032C	Chr11:380538-380583	supF Stat 3.0
YKL027W	Chr11:387550-387610	supF Stat 3.0
YKL022C	Chr11:395445-395507	supF Stat 3.0
YKL020C	Chr11:401089-401148	supF Stat 9.0
YKL210W	Chr11:40369-40426	supF Stat 3.0
YKL015W	Chr11:409982-410038	supF Stat 3.0
YKL010C	Chr11:422058-422107	supF Stat 9.0
YKL010C	Chr11:423377-423436	supF Stat 9.0
YKL005C	Chr11:433640-433696	supF Stat 3.0
YKL209C	Chr11:44451-44511	supF Stat 9.0
YKR009C	Chr11:455006-455050	supF Stat 3.0
YKR018C	Chr11:474075-474139	supF Stat 3.0
YKR019C	Chr11:477430-477479	supF Stat 9.0
YKR028W	Chr11:495358-495415	supF Stat 3.0
YKR031C	Chr11:501633-501692	supF Stat 9.0
YKR031C	Chr11:505101-505160	supF Stat 9.0
YKR036C	Chr11:510189-510248	supF Stat 3.0
YKR046C	Chr11:524092-524136	supF Stat 3.0
YKR046C	Chr11:524536-524585	supF Stat 3.0
YKR050W	Chr11:528968-529015	supF Stat 9.0
YKR054C	Chr11:537125-537169	supF Stat 9.0
YKR054C	Chr11:542375-542431	supF Stat 9.0
YKR054C	Chr11:546270-546329	supF Stat 9.0
YKL204W	Chr11:54903-54950	supF Stat 3.0
YKR056W	Chr11:549316-549368	supF Stat 3.0
YKR058W	Chr11:553272-553326	supF Stat 3.0
YKR058W	Chr11:554074-554124	supF Stat 3.0
YKR063C	Chr11:560987-561037	supF Stat 9.0
YKR063C	Chr11:561494-561540	supF Stat 9.0
YKL203C	Chr11:57069-57119	supF Stat 9.0
YKR069W	Chr11:571527-571584	supF Stat 3.0
YKR069W	Chr11:572276-572336	supF Stat 3.0
YKL203C	Chr11:58112-58156	supF Stat 9.0
YKR086W	Chr11:600275-600329	supF Stat 3.0
YKR086W	Chr11:601556-601600	supF Stat 3.0
YKL203C	Chr11:60380-60429	supF Stat 9.0
YKR089C	Chr11:605667-605711	supF Stat 3.0
YKR089C	Chr11:607086-607140	supF Stat 3.0
YKR090W	Chr11:609646-609695	supF Stat 3.0
YKR093W	Chr11:615858-615914	supF Stat 3.0
YKR095W	Chr11:623469-623526	supF Stat 9.0
YKR097W	Chr11:631428-631486	supF Stat 3.0
YKR097W	Chr11:631817-631866	supF Stat 3.0
YKR099W	Chr11:636816-636879	supF Stat 3.0
YKR105C	Chr11:659632-659678	supF Stat 3.0
YKL188C	Chr11:87775-87831	supF Stat 9.0
YKL187C	Chr11:90813-90857	supF Stat 9.0
YKL187C	Chr11:91152-91197	supF Stat 9.0
YKL184W	Chr11:97686-97736	supF Stat 3.0
YLR431C	Chr12:1000920-1000977	supF Stat 3.0
YLR436C	Chr12:1009706-1009750	supF Stat 9.0
YLR439W	Chr12:1014698-1014742	supF Stat 3.0
YLL021W	Chr12:101877-101931	supF Stat 9.0
YLR442C	Chr12:1020342-1020402	supF Stat 9.0
YLR442C	Chr12:1020996-1021054	supF Stat 9.0
YLL021W	Chr12:102846-102904	supF Stat 9.0
YLR450W	Chr12:1034281-1034325	supF Stat 9.0
YLR450W	Chr12:1035022-1035071	supF Stat 9.0
YLL021W	Chr12:103869-103918	supF Stat 9.0
YLR454W	Chr12:1047169-1047231	supF Stat 9.0
YLR454W	Chr12:1049543-1049587	supF Stat 9.0
YLL019C	Chr12:106910-106962	supF Stat 9.0
YLL019C	Chr12:107608-107660	supF Stat 9.0
YLL015W	Chr12:117894-117944	supF Stat 9.0
YLL015W	Chr12:119657-119720	supF Stat 9.0
YLL010C	Chr12:130375-130419	supF Stat 3.0
YLL003W	Chr12:144488-144544	supF Stat 3.0
YLR001C	Chr12:152721-152771	supF Stat 3.0
YLR004C	Chr12:158989-159033	supF Stat 3.0
YLR006C	Chr12:162875-162925	supF Stat 9.0
YLR014C	Chr12:173982-174031	supF Stat 9.0
YLR019W	Chr12:180546-180598	supF Stat 3.0
YLR024C	Chr12:191326-191378	supF Stat 9.0
YLR028C	Chr12:199937-199981	supF Stat 3.0
YLR032W	Chr12:206376-206432	supF Stat 9.0
YLR032W	Chr12:207169-207223	supF Stat 9.0
YLR032W	Chr12:208239-208284	supF Stat 9.0
YLR035C	Chr12:212959-213010	supF Stat 3.0
YLR035C	Chr12:213779-213837	supF Stat 3.0
YLR040C	Chr12:229285-229347	supF Stat 3.0
YLR040C	Chr12:229417-229463	supF Stat 3.0
YLR045C	Chr12:236186-236242	supF Stat 3.0
YLR047C	Chr12:240899-240959	supF Stat 3.0
YLR055C	Chr12:251970-252014	supF Stat 3.0
YLR057W	Chr12:255493-255537	supF Stat 3.0
YLL056C	Chr12:27727-27771	supF Stat 3.0
YLR084C	Chr12:297110-297172	supF Stat 3.0
YLR084C	Chr12:299231-299289	supF Stat 3.0
YLR087C	Chr12:308326-308383	supF Stat 9.0
YLR087C	Chr12:312117-312161	supF Stat 9.0
YLR087C	Chr12:312380-312433	supF Stat 9.0
YLR095C	Chr12:330752-330804	supF Stat 3.0
YLR096W	Chr12:334107-334156	supF Stat 9.0
YLR096W	Chr12:335237-335287	supF Stat 9.0
YLR098C	Chr12:339312-339364	supF Stat 3.0
YLR106C	Chr12:350757-350801	supF Stat 9.0
YLR106C	Chr12:351592-351636	supF Stat 9.0
YLR106C	Chr12:352504-352550	supF Stat 9.0
YLR106C	Chr12:355947-356005	supF Stat 9.0
YLR106C	Chr12:358504-358558	supF Stat 9.0
YLR106C	Chr12:359489-359546	supF Stat 9.0
YLR106C	Chr12:361730-361781	supF Stat 9.0
YLR106C	Chr12:362476-362523	supF Stat 9.0
YLR115W	Chr12:379691-379735	supF Stat 3.0
YLR120C	Chr12:387306-387362	supF Stat 9.0
YLR120C	Chr12:387748-387792	supF Stat 9.0
YLR121C	Chr12:390064-390123	supF Stat 3.0
YLR127C	Chr12:396888-396952	supF Stat 9.0
YLR133W	Chr12:409166-409218	supF Stat 3.0
YLR134W	Chr12:411504-411555	supF Stat 9.0
YLR135W	Chr12:414330-414380	supF Stat 9.0
YLR138W	Chr12:419974-420025	supF Stat 3.0
YLL048C	Chr12:43033-43082	supF Stat 9.0
YLR144C	Chr12:430770-430823	supF Stat 3.0
YLR148W	Chr12:435354-435412	supF Stat 3.0
YLR149C	Chr12:438069-438113	supF Stat 3.0
YLR149C	Chr12:439288-439339	supF Stat 3.0
YLL048C	Chr12:43969-44013	supF Stat 9.0
YLR152C	Chr12:443967-444024	supF Stat 3.0
YLR176C	Chr12:508827-508879	supF Stat 3.0
YLR177W	Chr12:512077-512128	supF Stat 3.0
YLL043W	Chr12:51343-51390	supF Stat 3.0
YLR187W	Chr12:525556-525613	supF Stat 9.0
YLR187W	Chr12:526204-526263	supF Stat 9.0
YLR187W	Chr12:527205-527267	supF Stat 9.0
YLL040C	Chr12:54650-54706	supF Stat 9.0
YLR207W	Chr12:556925-556983	supF Stat 3.0
YLR207W	Chr12:558472-558518	supF Stat 3.0
YLL040C	Chr12:56000-56056	supF Stat 9.0
YLL040C	Chr12:57161-57217	supF Stat 9.0
YLR219W	Chr12:574789-574852	supF Stat 3.0
YLR223C	Chr12:582701-582753	supF Stat 3.0
YLL040C	Chr12:59318-59374	supF Stat 9.0
YLR228C	Chr12:600565-600612	supF Stat 3.0
YLR228C	Chr12:600978-601022	supF Stat 3.0
YLR233C	Chr12:609042-609101	supF Stat 3.0
YLR234W	Chr12:610395-610439	supF Stat 9.0
YLR234W	Chr12:610779-610823	supF Stat 9.0
YLR237W	Chr12:613181-613225	supF Stat 3.0
YLR240W	Chr12:618592-618650	supF Stat 3.0
YLR241W	Chr12:622112-622161	supF Stat 3.0
YLR247C	Chr12:629758-629808	supF Stat 3.0
YLR247C	Chr12:630901-630953	supF Stat 3.0
YLR247C	Chr12:633122-633174	supF Stat 3.0
YLR249W	Chr12:637303-637347	supF Stat 9.0
YLR249W	Chr12:638405-638449	supF Stat 9.0
YLR256W	Chr12:647692-647736	supF Stat 9.0
YLR256W	Chr12:649042-649100	supF Stat 9.0
YLR258W	Chr12:661033-661093	supF Stat 9.0
YLR258W	Chr12:661662-661724	supF Stat 9.0
YLR260W	Chr12:667346-667403	supF Stat 3.0
YLR263W	Chr12:671475-671526	supF Stat 3.0
YLR272C	Chr12:684767-684819	supF Stat 9.0
YLR273C	Chr12:690507-690569	supF Stat 3.0
YLR278C	Chr12:700802-700846	supF Stat 9.0
YLR278C	Chr12:701340-701399	supF Stat 9.0
YLR278C	Chr12:701999-702055	supF Stat 9.0
YLR278C	Chr12:703195-703239	supF Stat 9.0
YLR278C	Chr12:703852-703908	supF Stat 9.0
YLR288C	Chr12:714115-714169	supF Stat 3.0
YLR300W	Chr12:729819-729869	supF Stat 3.0
YLR305C	Chr12:738994-739046	supF Stat 9.0
YLR305C	Chr12:742096-742153	supF Stat 9.0
YLR309C	Chr12:751348-751398	supF Stat 3.0
YLR310C	Chr12:753196-753240	supF Stat 3.0
YLR310C	Chr12:754677-754727	supF Stat 3.0
YLR310C	Chr12:755951-756000	supF Stat 3.0
YLR312C	Chr12:758611-758674	supF Stat 3.0
YLR318W	Chr12:767914-767971	supF Stat 3.0
YLR319C	Chr12:769890-769934	supF Stat 3.0
YLR320W	Chr12:772969-773013	supF Stat 9.0
YLR320W	Chr12:774734-774796	supF Stat 9.0
YLR324W	Chr12:780235-780279	supF Stat 3.0
YLL031C	Chr12:79241-79292	supF Stat 3.0
YLR337C	Chr12:803777-803821	supF Stat 9.0
YLR337C	Chr12:804161-804208	supF Stat 9.0
YLR342W	Chr12:810544-810602	supF Stat 9.0
YLR342W	Chr12:812823-812880	supF Stat 9.0
YLR342W	Chr12:814132-814189	supF Stat 9.0
YLL029W	Chr12:82207-82256	supF Stat 3.0
YLR347C	Chr12:824740-824794	supF Stat 3.0
YLR352W	Chr12:832709-832762	supF Stat 9.0
YLR353W	Chr12:834991-835048	supF Stat 3.0
YLR353W	Chr12:835764-835810	supF Stat 3.0
YLL028W	Chr12:85063-85107	supF Stat 9.0
YLR362W	Chr12:851102-851156	supF Stat 9.0
YLL028W	Chr12:85679-85736	supF Stat 9.0
YLR368W	Chr12:858918-858980	supF Stat 3.0
YLL028W	Chr12:86414-86458	supF Stat 9.0
YLR371W	Chr12:864568-864625	supF Stat 9.0
YLR371W	Chr12:865067-865121	supF Stat 9.0
YLR373C	Chr12:869900-869951	supF Stat 9.0
YLR377C	Chr12:874395-874439	supF Stat 3.0
YLR378C	Chr12:876440-876486	supF Stat 3.0
YLR381W	Chr12:881155-881199	supF Stat 3.0
YLR381W	Chr12:881711-881775	supF Stat 3.0
YLR383W	Chr12:887445-887502	supF Stat 3.0
YLL026W	Chr12:89036-89086	supF Stat 3.0
YLR384C	Chr12:891456-891515	supF Stat 9.0
YLR386W	Chr12:895710-895766	supF Stat 9.0
YLL026W	Chr12:90064-90118	supF Stat 3.0
YLR389C	Chr12:900699-900751	supF Stat 9.0
YLL026W	Chr12:91059-91104	supF Stat 3.0
YLR398C	Chr12:915812-915865	supF Stat 3.0
YLR398C	Chr12:916735-916785	supF Stat 3.0
YLR403W	Chr12:926376-926438	supF Stat 3.0
YLR410W	Chr12:939150-939194	supF Stat 3.0
YLR413W	Chr12:952620-952671	supF Stat 3.0
YLR419W	Chr12:961682-961736	supF Stat 3.0
YLR422W	Chr12:968531-968593	supF Stat 9.0
YLR422W	Chr12:969615-969668	supF Stat 9.0
YLR422W	Chr12:971001-971057	supF Stat 9.0
YLL024C	Chr12:97215-97266	supF Stat 3.0
YLR424W	Chr12:974979-975036	supF Stat 3.0
YLR427W	Chr12:988815-988866	supF Stat 3.0
YLR427W	Chr12:989387-989438	supF Stat 3.0
YLR427W	Chr12:990167-990211	supF Stat 3.0
YLR430W	Chr12:994843-994897	supF Stat 9.0
YLR430W	Chr12:997301-997358	supF Stat 9.0
YLR430W	Chr12:998904-998960	supF Stat 9.0
YML081W	Chr13:105888-105932	supF Stat 3.0
YML081W	Chr13:107667-107711	supF Stat 3.0
YML075C	Chr13:117887-117953	supF Stat 3.0
YML072C	Chr13:125721-125778	supF Stat 9.0
YML072C	Chr13:126788-126845	supF Stat 9.0
YML072C	Chr13:127753-127804	supF Stat 9.0
YML071C	Chr13:130254-130313	supF Stat 3.0
YML065W	Chr13:143632-143677	supF Stat 9.0
YML061C	Chr13:149595-149652	supF Stat 9.0
YML061C	Chr13:150233-150289	supF Stat 9.0
YML059C	Chr13:153617-153673	supF Stat 9.0
YML059C	Chr13:154447-154494	supF Stat 9.0
YML059C	Chr13:156216-156260	supF Stat 9.0
YML128C	Chr13:16220-16272	supF Stat 3.0
YML054C	Chr13:166310-166367	supF Stat 9.0
YML054C	Chr13:166886-166932	supF Stat 9.0
YML049C	Chr13:174917-174977	supF Stat 3.0
YML049C	Chr13:176190-176255	supF Stat 3.0
YML049C	Chr13:178159-178215	supF Stat 3.0
YML127W	Chr13:17889-17939	supF Stat 3.0
YML031C-A	Chr13:214170-214214	supF Stat 3.0
YML029W	Chr13:218662-218718	supF Stat 9.0
YML027W	Chr13:222486-222542	supF Stat 3.0
YML124C	Chr13:22798-22842	supF Stat 3.0
YML023C	Chr13:228346-228400	supF Stat 9.0
YML124C	Chr13:23507-23564	supF Stat 3.0
YML017W	Chr13:238233-238278	supF Stat 3.0
YML010W	Chr13:248964-249014	supF Stat 3.0
YML002W	Chr13:265535-265591	supF Stat 9.0
YMR005W	Chr13:276161-276205	supF Stat 3.0
YMR006C	Chr13:278278-278327	supF Stat 3.0
YMR008C	Chr13:281174-281230	supF Stat 3.0
YMR012W	Chr13:292798-292855	supF Stat 9.0
YMR012W	Chr13:293810-293864	supF Stat 9.0
YMR016C	Chr13:304257-304317	supF Stat 3.0
YMR016C	Chr13:305062-305121	supF Stat 3.0
YMR019W	Chr13:312415-312471	supF Stat 3.0
YMR019W	Chr13:314159-314218	supF Stat 3.0
YMR031C	Chr13:333442-333505	supF Stat 3.0
YMR032W	Chr13:335433-335477	supF Stat 3.0
YMR037C	Chr13:344712-344768	supF Stat 3.0
YMR041C	Chr13:351812-351875	supF Stat 3.0
YML117W	Chr13:35560-35606	supF Stat 9.0
YML117W	Chr13:36326-36388	supF Stat 9.0
YMR047C	Chr13:364885-364941	supF Stat 9.0
YMR047C	Chr13:366439-366492	supF Stat 9.0
YMR049C	Chr13:369968-370026	supF Stat 3.0
YMR054W	Chr13:383978-384040	supF Stat 9.0
YMR054W	Chr13:384752-384809	supF Stat 9.0
YMR058W	Chr13:389793-389837	supF Stat 3.0
YMR066W	Chr13:403086-403142	supF Stat 3.0
YMR076C	Chr13:417414-417471	supF Stat 9.0
YMR086W	Chr13:439394-439445	supF Stat 3.0
YMR089C	Chr13:446751-446811	supF Stat 3.0
YMR096W	Chr13:458556-458606	supF Stat 3.0
YMR102C	Chr13:470430-470476	supF Stat 9.0
YMR102C	Chr13:471490-471548	supF Stat 9.0
YMR104C	Chr13:474399-474455	supF Stat 3.0
YMR106C	Chr13:478819-478871	supF Stat 3.0
YML111W	Chr13:48054-48098	supF Stat 3.0
YMR108W	Chr13:485317-485374	supF Stat 3.0
YMR109W	Chr13:488070-488119	supF Stat 9.0
YMR109W	Chr13:488972-489030	supF Stat 9.0
YMR116C	Chr13:500154-500203	supF Stat 3.0
YMR128W	Chr13:524458-524521	supF Stat 9.0
YMR128W	Chr13:525529-525580	supF Stat 9.0
YMR128W	Chr13:525991-526045	supF Stat 9.0
YML109W	Chr13:52885-52929	supF Stat 9.0
YMR129W	Chr13:529306-529368	supF Stat 3.0
YMR129W	Chr13:531146-531204	supF Stat 3.0
YML109W	Chr13:53907-53961	supF Stat 9.0
YMR154C	Chr13:566656-566720	supF Stat 3.0
YMR162C	Chr13:580768-580826	supF Stat 9.0
YMR162C	Chr13:581806-581858	supF Stat 9.0
YMR162C	Chr13:583240-583296	supF Stat 9.0
YMR165C	Chr13:591363-591407	supF Stat 3.0
YMR168C	Chr13:598689-598733	supF Stat 3.0
YML104C	Chr13:61005-61063	supF Stat 3.0
YMR176W	Chr13:612806-612862	supF Stat 9.0
YMR179W	Chr13:621388-621452	supF Stat 3.0
YMR189W	Chr13:638469-638513	supF Stat 9.0
YMR189W	Chr13:639413-639464	supF Stat 9.0
YMR190C	Chr13:642235-642291	supF Stat 3.0
YMR190C	Chr13:643888-643944	supF Stat 3.0
YMR190C	Chr13:645023-645075	supF Stat 3.0
YMR205C	Chr13:672551-672601	supF Stat 3.0
YMR205C	Chr13:673920-673970	supF Stat 3.0
YMR207C	Chr13:679147-679206	supF Stat 3.0
YMR207C	Chr13:682001-682058	supF Stat 3.0
YMR213W	Chr13:693476-693520	supF Stat 3.0
YMR213W	Chr13:694318-694374	supF Stat 3.0
YMR219W	Chr13:709933-709983	supF Stat 9.0
YMR219W	Chr13:711293-711337	supF Stat 9.0
YML100W	Chr13:71132-71189	supF Stat 9.0
YML100W	Chr13:71529-71579	supF Stat 9.0
YML100W	Chr13:72282-72331	supF Stat 9.0
YMR229C	Chr13:726558-726618	supF Stat 3.0
YMR229C	Chr13:728198-728255	supF Stat 3.0
YMR229C	Chr13:730076-730133	supF Stat 3.0
YMR231W	Chr13:735415-735472	supF Stat 3.0
YMR236W	Chr13:743038-743082	supF Stat 3.0
YMR246W	Chr13:761073-761124	supF Stat 3.0
YMR247C	Chr13:765202-765258	supF Stat 9.0
YMR247C	Chr13:766619-766677	supF Stat 9.0
YMR250W	Chr13:771776-771821	supF Stat 3.0
YMR251W	Chr13:773409-773471	supF Stat 3.0
YMR259C	Chr13:785897-785953	supF Stat 3.0
YMR259C	Chr13:786756-786808	supF Stat 3.0
YMR261C	Chr13:791498-791542	supF Stat 9.0
YMR261C	Chr13:792300-792344	supF Stat 9.0
YMR261C	Chr13:793123-793167	supF Stat 9.0
YMR266W	Chr13:799658-799702	supF Stat 3.0
YMR273C	Chr13:812840-812897	supF Stat 3.0
YMR275C	Chr13:816913-816972	supF Stat 3.0
YMR275C	Chr13:817484-817530	supF Stat 3.0
YMR277W	Chr13:821344-821388	supF Stat 3.0
YMR280C	Chr13:827250-827307	supF Stat 3.0
YMR280C	Chr13:829606-829662	supF Stat 3.0
YMR280C	Chr13:830847-830899	supF Stat 3.0
YMR280C	Chr13:831096-831156	supF Stat 3.0
YMR285C	Chr13:840686-840742	supF Stat 3.0
YMR288W	Chr13:846196-846250	supF Stat 3.0
YMR291W	Chr13:853331-853388	supF Stat 3.0
YMR301C	Chr13:867999-868046	supF Stat 3.0
YMR302C	Chr13:871866-871913	supF Stat 3.0
YMR303C	Chr13:873736-873787	supF Stat 3.0
YMR304W	Chr13:876058-876123	supF Stat 9.0
YMR304W	Chr13:876798-876857	supF Stat 9.0
YMR304W	Chr13:877715-877766	supF Stat 9.0
YML091C	Chr13:88381-88438	supF Stat 3.0
YMR306W	Chr13:884638-884695	supF Stat 9.0
YMR308C	Chr13:889899-889952	supF Stat 9.0
YMR308C	Chr13:890754-890804	supF Stat 9.0
YMR317W	Chr13:908135-908179	supF Stat 3.0
YMR317W	Chr13:910242-910289	supF Stat 3.0
YML088W	Chr13:93129-93183	supF Stat 3.0
YNL282W	Chr14:107798-107862	supF Stat 3.0
YNL279W	Chr14:112458-112515	supF Stat 3.0
YNL278W	Chr14:114242-114294	supF Stat 9.0
YNL278W	Chr14:115465-115517	supF Stat 9.0
YNL273W	Chr14:124575-124631	supF Stat 9.0
YNL271C	Chr14:131566-131618	supF Stat 9.0
YNL267W	Chr14:142830-142886	supF Stat 3.0
YNL262W	Chr14:148342-148393	supF Stat 9.0
YNL262W	Chr14:149071-149118	supF Stat 9.0
YNL262W	Chr14:149832-149876	supF Stat 9.0
YNL262W	Chr14:151047-151099	supF Stat 9.0
YNL262W	Chr14:151944-152001	supF Stat 9.0
YNL262W	Chr14:153489-153549	supF Stat 9.0
YNL257C	Chr14:162349-162411	supF Stat 3.0
YNL254C	Chr14:169090-169147	supF Stat 3.0
YNL250W	Chr14:178367-178429	supF Stat 9.0
YNL249C	Chr14:180621-180680	supF Stat 3.0
YNL243W	Chr14:189482-189538	supF Stat 9.0
YNL242W	Chr14:193150-193207	supF Stat 9.0
YNL242W	Chr14:194961-195014	supF Stat 9.0
YNL241C	Chr14:197009-197053	supF Stat 3.0
YNL329C	Chr14:20466-20520	supF Stat 3.0
YNL237W	Chr14:205376-205420	supF Stat 3.0
YNL237W	Chr14:205779-205823	supF Stat 3.0
YNL237W	Chr14:206111-206161	supF Stat 3.0
YNL327W	Chr14:25170-25214	supF Stat 9.0
YNL203C	Chr14:259640-259684	supF Stat 3.0
YNL327W	Chr14:26156-26207	supF Stat 9.0
YNL327W	Chr14:26865-26922	supF Stat 9.0
YNL195C	Chr14:271736-271786	supF Stat 3.0
YNL194C	Chr14:273343-273387	supF Stat 3.0
YNL192W	Chr14:277790-277843	supF Stat 9.0
YNL192W	Chr14:278947-279010	supF Stat 9.0
YNL183C	Chr14:294714-294768	supF Stat 3.0
YNL325C	Chr14:30329-30381	supF Stat 3.0
YNL172W	Chr14:311625-311687	supF Stat 9.0
YNL172W	Chr14:313129-313180	supF Stat 9.0
YNL172W	Chr14:313951-314008	supF Stat 9.0
YNL172W	Chr14:315193-315249	supF Stat 9.0
YNL167C	Chr14:319801-319863	supF Stat 3.0
YNL163C	Chr14:328266-328323	supF Stat 9.0
YNL162W	Chr14:331644-331700	supF Stat 3.0
YNL144C	Chr14:353332-353392	supF Stat 3.0
YNL142W	Chr14:357645-357689	supF Stat 3.0
YNL139C	Chr14:363654-363711	supF Stat 3.0
YNL321W	Chr14:36457-36510	supF Stat 9.0
YNL132W	Chr14:377129-377173	supF Stat 3.0
YNL127W	Chr14:385848-385910	supF Stat 3.0
YNL124W	Chr14:393063-393113	supF Stat 9.0
YNL124W	Chr14:393922-393974	supF Stat 9.0
YNL123W	Chr14:395890-395947	supF Stat 3.0
YNL106C	Chr14:422260-422313	supF Stat 9.0
YNL102W	Chr14:431592-431649	supF Stat 9.0
YNL102W	Chr14:432823-432872	supF Stat 9.0
YNL101W	Chr14:436586-436644	supF Stat 3.0
YNL095C	Chr14:445951-446000	supF Stat 9.0
YNL091W	Chr14:454149-454201	supF Stat 9.0
YNL088W	Chr14:458779-458836	supF Stat 3.0
YNL088W	Chr14:460491-460549	supF Stat 3.0
YNL087W	Chr14:462756-462802	supF Stat 3.0
YNL087W	Chr14:464890-464950	supF Stat 3.0
YNL082W	Chr14:475048-475102	supF Stat 3.0
YNL079C	Chr14:478737-478783	supF Stat 3.0
YNL068C	Chr14:497024-497073	supF Stat 3.0
YNL068C	Chr14:497832-497881	supF Stat 3.0
YNL063W	Chr14:508589-508633	supF Stat 3.0
YNL059C	Chr14:514859-514903	supF Stat 3.0
YNL054W	Chr14:526264-526322	supF Stat 3.0
YNL054W	Chr14:527066-527113	supF Stat 3.0
YNL054W	Chr14:528304-528360	supF Stat 3.0
YNL053W	Chr14:530308-530367	supF Stat 3.0
YNL049C	Chr14:536441-536493	supF Stat 3.0
YNL308C	Chr14:55361-55420	supF Stat 3.0
YNL034W	Chr14:571585-571641	supF Stat 9.0
YNL020C	Chr14:596009-596055	supF Stat 9.0
YNL020C	Chr14:596670-596717	supF Stat 9.0
YNL018C	Chr14:600833-600877	supF Stat 9.0
YNL014W	Chr14:607533-607586	supF Stat 9.0
YNL302C	Chr14:62430-62489	supF Stat 3.0
YNR002C	Chr14:633459-633503	supF Stat 3.0
YNR008W	Chr14:640886-640943	supF Stat 3.0
YNR011C	Chr14:645260-645304	supF Stat 9.0
YNR011C	Chr14:645462-645511	supF Stat 9.0
YNR013C	Chr14:649878-649929	supF Stat 9.0
YNR013C	Chr14:650387-650437	supF Stat 9.0
YNR014W	Chr14:652629-652685	supF Stat 3.0
YNR016C	Chr14:656861-656910	supF Stat 3.0
YNR016C	Chr14:657913-657965	supF Stat 3.0
YNR016C	Chr14:658638-658682	supF Stat 3.0
YNR016C	Chr14:659579-659623	supF Stat 3.0
YNR016C	Chr14:660470-660514	supF Stat 3.0
YNR031C	Chr14:682335-682392	supF Stat 9.0
YNR031C	Chr14:684926-684976	supF Stat 9.0
YNL298W	Chr14:69576-69635	supF Stat 3.0
YNR044W	Chr14:703884-703933	supF Stat 3.0
YNL298W	Chr14:70411-70455	supF Stat 3.0
YNR044W	Chr14:704129-704173	supF Stat 3.0
YNR051C	Chr14:717553-717605	supF Stat 3.0
YNR055C	Chr14:728989-729035	supF Stat 3.0
YNR056C	Chr14:732013-732063	supF Stat 3.0
YNR056C	Chr14:732690-732747	supF Stat 3.0
YNR057C	Chr14:733818-733862	supF Stat 3.0
YNR058W	Chr14:735366-735410	supF Stat 3.0
YNR062C	Chr14:744765-744817	supF Stat 3.0
YNR062C	Chr14:744900-744944	supF Stat 3.0
YNL297C	Chr14:74556-74615	supF Stat 3.0
YNR065C	Chr14:750861-750917	supF Stat 9.0
YNR065C	Chr14:752373-752423	supF Stat 9.0
YNR067C	Chr14:757341-757400	supF Stat 9.0
YNR067C	Chr14:758772-758834	supF Stat 9.0
YNR070W	Chr14:766189-766238	supF Stat 9.0
YNR070W	Chr14:767247-767306	supF Stat 9.0
YNR070W	Chr14:768999-769053	supF Stat 9.0
YNR074C	Chr14:777748-777792	supF Stat 3.0
YNL295W	Chr14:78061-78118	supF Stat 3.0
YNL293W	Chr14:81934-81978	supF Stat 3.0
YOR356W	Chr15:1008256-1008313	supF Stat 3.0
YOR361C	Chr15:1015962-1016012	supF Stat 3.0
YOR363C	Chr15:1021008-1021065	supF Stat 9.0
YOR363C	Chr15:1021502-1021553	supF Stat 9.0
YOR363C	Chr15:1022028-1022072	supF Stat 9.0
YOR371C	Chr15:1032153-1032213	supF Stat 3.0
YOR372C	Chr15:1035513-1035570	supF Stat 3.0
YOR374W	Chr15:1040097-1040141	supF Stat 3.0
YOL113W	Chr15:104865-104927	supF Stat 3.0
YOR378W	Chr15:1050125-1050181	supF Stat 3.0
YOR378W	Chr15:1050848-1050905	supF Stat 3.0
YOR380W	Chr15:1051951-1051997	supF Stat 3.0
YOR381W	Chr15:1056048-1056108	supF Stat 9.0
YOR381W	Chr15:1056540-1056596	supF Stat 9.0
YOR383C	Chr15:1060966-1061010	supF Stat 3.0
YOR384W	Chr15:1062485-1062543	supF Stat 3.0
YOL103W	Chr15:125092-125149	supF Stat 3.0
YOL098C	Chr15:133806-133868	supF Stat 9.0
YOL098C	Chr15:134818-134882	supF Stat 9.0
YOL087C	Chr15:156398-156460	supF Stat 9.0
YOL087C	Chr15:157222-157284	supF Stat 9.0
YOL084W	Chr15:162537-162581	supF Stat 9.0
YOL084W	Chr15:163560-163610	supF Stat 9.0
YOL081W	Chr15:172271-172315	supF Stat 9.0
YOL081W	Chr15:173362-173418	supF Stat 9.0
YOL081W	Chr15:173919-173975	supF Stat 9.0
YOL081W	Chr15:176266-176326	supF Stat 9.0
YOL081W	Chr15:178127-178171	supF Stat 9.0
YOL078W	Chr15:182405-182455	supF Stat 9.0
YOL075C	Chr15:191715-191764	supF Stat 9.0
YOL075C	Chr15:193288-193332	supF Stat 9.0
YOL158C	Chr15:20214-20270	supF Stat 3.0
YOL066C	Chr15:203869-203923	supF Stat 3.0
YOL063C	Chr15:208705-208764	supF Stat 3.0
YOL158C	Chr15:21086-21130	supF Stat 3.0
YOL060C	Chr15:215164-215208	supF Stat 3.0
YOL055C	Chr15:225469-225523	supF Stat 9.0
YOL157C	Chr15:23178-23232	supF Stat 3.0
YOL051W	Chr15:237018-237062	supF Stat 3.0
YOL045W	Chr15:245136-245180	supF Stat 3.0
YOL034W	Chr15:261177-261234	supF Stat 3.0
YOL034W	Chr15:261775-261832	supF Stat 3.0
YOL034W	Chr15:262989-263035	supF Stat 3.0
YOL021C	Chr15:283180-283230	supF Stat 3.0
YOL019W	Chr15:289922-289975	supF Stat 3.0
YOL155C	Chr15:29106-29156	supF Stat 9.0
YOL155C	Chr15:30220-30265	supF Stat 9.0
YOL011W	Chr15:305595-305654	supF Stat 3.0
YOL011W	Chr15:306618-306677	supF Stat 3.0
YOL155C	Chr15:31075-31119	supF Stat 9.0
YOL004W	Chr15:317697-317746	supF Stat 9.0
YOL004W	Chr15:319564-319608	supF Stat 9.0
YOR011W	Chr15:351737-351786	supF Stat 9.0
YOR011W	Chr15:352917-352966	supF Stat 9.0
YOR027W	Chr15:381345-381389	supF Stat 3.0
YOR032C	Chr15:390095-390153	supF Stat 3.0
YOR035C	Chr15:398824-398883	supF Stat 3.0
YOR038C	Chr15:403995-404045	supF Stat 3.0
YOR040W	Chr15:407759-407803	supF Stat 3.0
YOR049C	Chr15:423237-423290	supF Stat 3.0
YOR058C	Chr15:434451-434515	supF Stat 3.0
YOR070C	Chr15:456836-456892	supF Stat 3.0
YOR081C	Chr15:477588-477644	supF Stat 3.0
YOR086C	Chr15:484756-484814	supF Stat 9.0
YOR086C	Chr15:485194-485238	supF Stat 9.0
YOR092W	Chr15:495535-495579	supF Stat 3.0
YOR092W	Chr15:496433-496484	supF Stat 3.0
YOR093C	Chr15:501376-501434	supF Stat 9.0
YOR098C	Chr15:509285-509329	supF Stat 3.0
YOR109W	Chr15:527083-527139	supF Stat 9.0
YOR113W	Chr15:536200-536254	supF Stat 3.0
YOR116C	Chr15:540609-540666	supF Stat 3.0
YOR116C	Chr15:542112-542161	supF Stat 3.0
YOR116C	Chr15:543936-543980	supF Stat 3.0
YOR124C	Chr15:555718-555778	supF Stat 3.0
YOR124C	Chr15:556203-556261	supF Stat 3.0
YOR127W	Chr15:562461-562511	supF Stat 3.0
YOR127W	Chr15:563361-563405	supF Stat 3.0
YOR129C	Chr15:567910-567964	supF Stat 9.0
YOR137C	Chr15:583076-583123	supF Stat 3.0
YOR138C	Chr15:585330-585383	supF Stat 9.0
YOR140W	Chr15:588020-588078	supF Stat 9.0
YOR140W	Chr15:588245-588289	supF Stat 9.0
YOR141C	Chr15:590877-590934	supF Stat 3.0
YOR151C	Chr15:614872-614918	supF Stat 3.0
YOR153W	Chr15:620904-620960	supF Stat 9.0
YOL138C	Chr15:62461-62512	supF Stat 9.0
YOR156C	Chr15:628554-628598	supF Stat 9.0
YOR156C	Chr15:629075-629132	supF Stat 9.0
YOR162C	Chr15:640913-640957	supF Stat 3.0
YOL164W	Chr15:6662-6706	supF Stat 3.0
YOR181W	Chr15:677529-677573	supF Stat 3.0
YOR187W	Chr15:684284-684333	supF Stat 3.0
YOR188W	Chr15:687820-687883	supF Stat 9.0
YOR191W	Chr15:694817-694874	supF Stat 9.0
YOR191W	Chr15:696333-696382	supF Stat 9.0
YOR192C	Chr15:699835-699879	supF Stat 3.0
YOR194C	Chr15:712257-712308	supF Stat 3.0
YOL164W	Chr15:7124-7176	supF Stat 3.0
YOR204W	Chr15:723881-723933	supF Stat 3.0
YOR207C	Chr15:731699-731755	supF Stat 9.0
YOR208W	Chr15:735352-735408	supF Stat 3.0
YOR217W	Chr15:750349-750398	supF Stat 3.0
YOR219C	Chr15:753525-753578	supF Stat 3.0
YOL130W	Chr15:76117-76183	supF Stat 3.0
YOR227W	Chr15:764776-764827	supF Stat 9.0
YOR227W	Chr15:765710-765755	supF Stat 9.0
YOR233W	Chr15:777066-777117	supF Stat 3.0
YOR234C	Chr15:778910-778970	supF Stat 3.0
YOR256C	Chr15:809428-809485	supF Stat 3.0
YOR270C	Chr15:829016-829063	supF Stat 9.0
YOR273C	Chr15:835032-835076	supF Stat 9.0
YOR273C	Chr15:835875-835926	supF Stat 9.0
YOL125W	Chr15:84385-84434	supF Stat 3.0
YOR291W	Chr15:864273-864330	supF Stat 9.0
YOR291W	Chr15:864677-864733	supF Stat 9.0
YOR293W	Chr15:867584-867628	supF Stat 3.0
YOR304W	Chr15:886615-886671	supF Stat 3.0
YOR317W	Chr15:909962-910006	supF Stat 3.0
YOL121C	Chr15:92567-92626	supF Stat 3.0
YOR326W	Chr15:927763-927820	supF Stat 9.0
YOR326W	Chr15:929240-929284	supF Stat 9.0
YOR328W	Chr15:932079-932132	supF Stat 9.0
YOR328W	Chr15:932418-932462	supF Stat 9.0
YOR328W	Chr15:933810-933859	supF Stat 9.0
YOR328W	Chr15:934112-934172	supF Stat 9.0
YOR328W	Chr15:935200-935252	supF Stat 9.0
YOR328W	Chr15:935482-935527	supF Stat 9.0
YOR329C	Chr15:937012-937075	supF Stat 9.0
YOR329C	Chr15:938009-938053	supF Stat 9.0
YOR329C	Chr15:938365-938428	supF Stat 9.0
YOR330C	Chr15:940200-940244	supF Stat 3.0
YOR331C	Chr15:943625-943669	supF Stat 3.0
YOR336W	Chr15:953426-953476	supF Stat 3.0
YOR341W	Chr15:962613-962666	supF Stat 9.0
YOR341W	Chr15:963891-963941	supF Stat 9.0
YOL117W	Chr15:98644-98697	supF Stat 3.0
YOR348C	Chr15:987560-987605	supF Stat 9.0
YOR348C	Chr15:988072-988116	supF Stat 9.0
YOL117W	Chr15:98954-99014	supF Stat 3.0
YOR353C	Chr15:999244-999304	supF Stat 3.0
YPL231W	Chr16:110127-110183	supF Stat 9.0
YPL231W	Chr16:112178-112228	supF Stat 9.0
YPL231W	Chr16:113043-113093	supF Stat 9.0
YPL226W	Chr16:123777-123836	supF Stat 9.0
YPL222W	Chr16:130355-130412	supF Stat 3.0
YPL222W	Chr16:131133-131179	supF Stat 3.0
YPL221W	Chr16:133342-133391	supF Stat 9.0
YPL221W	Chr16:133987-134031	supF Stat 9.0
YPL217C	Chr16:141147-141204	supF Stat 3.0
YPL214C	Chr16:149234-149292	supF Stat 3.0
YPL207W	Chr16:161063-161120	supF Stat 3.0
YPL190C	Chr16:186345-186402	supF Stat 3.0
YPL184C	Chr16:197228-197272	supF Stat 3.0
YPL180W	Chr16:206506-206562	supF Stat 3.0
YPL176C	Chr16:216393-216446	supF Stat 9.0
YPL176C	Chr16:217048-217098	supF Stat 9.0
YPL167C	Chr16:235791-235849	supF Stat 9.0
YPL160W	Chr16:248171-248215	supF Stat 3.0
YPL153C	Chr16:262277-262340	supF Stat 3.0
YPL150W	Chr16:268910-268967	supF Stat 3.0
YPL150W	Chr16:270630-270687	supF Stat 3.0
YPL147W	Chr16:274478-274534	supF Stat 9.0
YPL137C	Chr16:295361-295412	supF Stat 3.0
YPL128C	Chr16:307087-307131	supF Stat 3.0
YPL125W	Chr16:314601-314657	supF Stat 3.0
YPL116W	Chr16:330838-330900	supF Stat 3.0
YPL115C	Chr16:333973-334017	supF Stat 9.0
YPL110C	Chr16:342781-342834	supF Stat 9.0
YPL110C	Chr16:343236-343290	supF Stat 9.0
YPL110C	Chr16:344257-344315	supF Stat 9.0
YPL109C	Chr16:345813-345869	supF Stat 3.0
YPL106C	Chr16:350945-350998	supF Stat 3.0
YPL106C	Chr16:351961-352006	supF Stat 3.0
YPL105C	Chr16:354154-354204	supF Stat 9.0
YPL105C	Chr16:354438-354494	supF Stat 9.0
YPL104W	Chr16:357003-357054	supF Stat 9.0
YPL104W	Chr16:357427-357487	supF Stat 9.0
YPL103C	Chr16:359168-359226	supF Stat 3.0
YPL100W	Chr16:362439-362495	supF Stat 3.0
YPL089C	Chr16:380450-380512	supF Stat 3.0
YPL085W	Chr16:389337-389381	supF Stat 9.0
YPL085W	Chr16:390156-390208	supF Stat 9.0
YPL085W	Chr16:391875-391928	supF Stat 9.0
YPL085W	Chr16:392888-392939	supF Stat 9.0
YPL084W	Chr16:395506-395562	supF Stat 3.0
YPL082C	Chr16:399305-399349	supF Stat 3.0
YPL058C	Chr16:447302-447346	supF Stat 9.0
YPL058C	Chr16:448909-448967	supF Stat 9.0
YPL045W	Chr16:468267-468324	supF Stat 9.0
YPL040C	Chr16:477224-477281	supF Stat 3.0
YPL036W	Chr16:484932-484994	supF Stat 9.0
YPL029W	Chr16:496509-496553	supF Stat 3.0
YPL022W	Chr16:508314-508373	supF Stat 3.0
YPL017C	Chr16:519690-519749	supF Stat 3.0
YPL015C	Chr16:526427-526477	supF Stat 3.0
YPL014W	Chr16:527953-528002	supF Stat 3.0
YPL014W	Chr16:528317-528367	supF Stat 3.0
YPL012W	Chr16:531221-531265	supF Stat 3.0
YPL009C	Chr16:536854-536910	supF Stat 9.0
YPL008W	Chr16:541086-541140	supF Stat 3.0
YPL008W	Chr16:541574-541624	supF Stat 3.0
YPL006W	Chr16:545366-545410	supF Stat 9.0
YPL006W	Chr16:546289-546354	supF Stat 9.0
YPL006W	Chr16:547430-547487	supF Stat 9.0
YPL005W	Chr16:548945-548997	supF Stat 3.0
YPR003C	Chr16:562386-562432	supF Stat 9.0
YPR010C	Chr16:578827-578889	supF Stat 9.0
YPR010C	Chr16:579505-579561	supF Stat 9.0
YPR018W	Chr16:595414-595466	supF Stat 3.0
YPR019W	Chr16:598497-598541	supF Stat 9.0
YPR022C	Chr16:605145-605204	supF Stat 3.0
YPR026W	Chr16:617083-617136	supF Stat 9.0
YPR028W	Chr16:623837-623895	supF Stat 9.0
YPR030W	Chr16:630291-630343	supF Stat 3.0
YPR031W	Chr16:632241-632298	supF Stat 3.0
YPR032W	Chr16:636071-636115	supF Stat 3.0
YPR040W	Chr16:647520-647564	supF Stat 3.0
YPR042C	Chr16:651717-651774	supF Stat 3.0
YPR046W	Chr16:657039-657096	supF Stat 3.0
YPR049C	Chr16:661998-662057	supF Stat 9.0
YPR049C	Chr16:662591-662649	supF Stat 9.0
YPR055W	Chr16:669896-669955	supF Stat 3.0
YPR074C	Chr16:693736-693782	supF Stat 9.0
YPR074C	Chr16:694210-694266	supF Stat 9.0
YPR081C	Chr16:703676-703725	supF Stat 9.0
YPR085C	Chr16:709523-709580	supF Stat 3.0
YPR089W	Chr16:714271-714321	supF Stat 3.0
YPR095C	Chr16:723324-723368	supF Stat 9.0
YPR104C	Chr16:735222-735269	supF Stat 9.0
YPR105C	Chr16:738449-738508	supF Stat 9.0
YPR111W	Chr16:748377-748429	supF Stat 9.0
YPR112C	Chr16:750151-750195	supF Stat 3.0
YPR115W	Chr16:756079-756141	supF Stat 9.0
YPR115W	Chr16:757239-757288	supF Stat 9.0
YPR117W	Chr16:762468-762527	supF Stat 9.0
YPR117W	Chr16:763690-763748	supF Stat 9.0
YPR117W	Chr16:764522-764579	supF Stat 9.0
YPR120C	Chr16:774229-774285	supF Stat 9.0
YPL249C	Chr16:77535-77584	supF Stat 3.0
YPR121W	Chr16:779214-779263	supF Stat 9.0
YPR121W	Chr16:779580-779627	supF Stat 9.0
YPR135W	Chr16:800849-800903	supF Stat 9.0
YPR155C	Chr16:836675-836739	supF Stat 3.0
YPR156C	Chr16:839176-839226	supF Stat 9.0
YPR160W	Chr16:863207-863264	supF Stat 3.0
YPR161C	Chr16:865478-865522	supF Stat 3.0
YPR164W	Chr16:871855-871902	supF Stat 3.0
YPR164W	Chr16:873427-873486	supF Stat 3.0
YPR171W	Chr16:884368-884412	supF Stat 3.0
YPR175W	Chr16:890258-890314	supF Stat 3.0
YPR181C	Chr16:898590-898648	supF Stat 3.0
YPR184W	Chr16:902591-902641	supF Stat 9.0
YPR184W	Chr16:904765-904809	supF Stat 9.0
YPR189W	Chr16:913462-913524	supF Stat 3.0
YPR192W	Chr16:922117-922173	supF Stat 3.0
YPR194C	Chr16:924984-925041	supF Stat 3.0
YPR194C	Chr16:926446-926492	supF Stat 3.0
YPL242C	Chr16:92788-92832	supF Stat 3.0
YBL060W	Chr2:108403-108447	supF Stat 3.0
YBL060W	Chr2:109559-109615	supF Stat 3.0
YBL106C	Chr2:12014-12070	supF Stat 3.0
YBL042C	Chr2:139389-139433	supF Stat 3.0
YBL039C	Chr2:144787-144840	supF Stat 3.0
YBL037W	Chr2:149156-149213	supF Stat 9.0
YBL035C	Chr2:152375-152428	supF Stat 3.0
YBL034C	Chr2:155562-155622	supF Stat 9.0
YBL105C	Chr2:15863-15919	supF Stat 3.0
YBL029W	Chr2:166827-166871	supF Stat 3.0
YBL027W	Chr2:168761-168810	supF Stat 3.0
YBL022C	Chr2:180533-180583	supF Stat 9.0
YBL017C	Chr2:188015-188065	supF Stat 9.0
YBL017C	Chr2:189023-189077	supF Stat 9.0
YBL014C	Chr2:200915-200959	supF Stat 3.0
YBL011W	Chr2:204689-204749	supF Stat 3.0
YBL010C	Chr2:206844-206904	supF Stat 3.0
YBL008W	Chr2:210692-210754	supF Stat 9.0
YBL007C	Chr2:213533-213579	supF Stat 9.0
YBL007C	Chr2:214906-214962	supF Stat 9.0
YBL005W	Chr2:218352-218396	supF Stat 9.0
YBL005W	Chr2:219407-219472	supF Stat 9.0
YBL004W	Chr2:229433-229490	supF Stat 9.0
YBL103C	Chr2:22955-23019	supF Stat 3.0
YBL004W	Chr2:233236-233285	supF Stat 9.0
YBR001C	Chr2:241010-241066	supF Stat 3.0
YBR007C	Chr2:250432-250491	supF Stat 3.0
YBR008C	Chr2:253387-253431	supF Stat 9.0
YBL101C	Chr2:26224-26268	supF Stat 9.0
YBR015C	Chr2:268905-268949	supF Stat 3.0
YBR017C	Chr2:271718-271777	supF Stat 3.0
YBL101C	Chr2:27298-27355	supF Stat 9.0
YBR023C	Chr2:285511-285555	supF Stat 9.0
YBR023C	Chr2:286853-286904	supF Stat 9.0
YBR033W	Chr2:302598-302648	supF Stat 3.0
YBR033W	Chr2:304340-304399	supF Stat 3.0
YBR038W	Chr2:313598-313642	supF Stat 9.0
YBR049C	Chr2:335665-335723	supF Stat 3.0
YBR055C	Chr2:345677-345735	supF Stat 3.0
YBR057C	Chr2:352772-352834	supF Stat 3.0
YBR059C	Chr2:357458-357508	supF Stat 3.0
YBR059C	Chr2:359375-359431	supF Stat 3.0
YBR059C	Chr2:360012-360070	supF Stat 3.0
YBR072W	Chr2:382053-382097	supF Stat 3.0
YBR074W	Chr2:387414-387458	supF Stat 3.0
YBR079C	Chr2:396154-396210	supF Stat 3.0
YBR079C	Chr2:396939-396995	supF Stat 3.0
YBR080C	Chr2:399273-399330	supF Stat 3.0
YBR081C	Chr2:402961-403011	supF Stat 9.0
YBR081C	Chr2:404123-404185	supF Stat 9.0
YBR084W	Chr2:412268-412312	supF Stat 9.0
YBR084W	Chr2:413487-413537	supF Stat 9.0
YBR084C-A	Chr2:414806-414871	supF Stat 3.0
YBL097W	Chr2:41594-41652	supF Stat 3.0
YBR086C	Chr2:420760-420813	supF Stat 3.0
YBR086C	Chr2:422279-422338	supF Stat 3.0
YBR097W	Chr2:439407-439464	supF Stat 3.0
YBR098W	Chr2:442401-442455	supF Stat 9.0
YBR108W	Chr2:455063-455116	supF Stat 9.0
YBR108W	Chr2:455510-455559	supF Stat 9.0
YBR108W	Chr2:456020-456064	supF Stat 9.0
YBR108W	Chr2:456356-456400	supF Stat 9.0
YBR108W	Chr2:456641-456690	supF Stat 9.0
YBR114W	Chr2:468152-468210	supF Stat 9.0
YBR114W	Chr2:468779-468828	supF Stat 9.0
YBR117C	Chr2:474960-475004	supF Stat 9.0
YBR117C	Chr2:475627-475678	supF Stat 9.0
YBR123C	Chr2:485344-485395	supF Stat 3.0
YBR131W	Chr2:498019-498063	supF Stat 9.0
YBR131W	Chr2:498317-498362	supF Stat 9.0
YBR132C	Chr2:501079-501123	supF Stat 3.0
YBR133C	Chr2:503358-503421	supF Stat 3.0
YBR136W	Chr2:506059-506116	supF Stat 3.0
YBR136W	Chr2:509809-509859	supF Stat 3.0
YBR136W	Chr2:511224-511283	supF Stat 3.0
YBL088C	Chr2:51458-51503	supF Stat 9.0
YBR140C	Chr2:518449-518493	supF Stat 9.0
YBR140C	Chr2:520396-520456	supF Stat 9.0
YBR140C	Chr2:524416-524465	supF Stat 9.0
YBR141C	Chr2:527211-527255	supF Stat 3.0
YBR141C	Chr2:527915-527960	supF Stat 3.0
YBL088C	Chr2:52906-52963	supF Stat 9.0
YBL088C	Chr2:53343-53392	supF Stat 9.0
YBR150C	Chr2:543259-543316	supF Stat 3.0
YBR156C	Chr2:552150-552200	supF Stat 3.0
YBR157C	Chr2:553863-553910	supF Stat 3.0
YBL088C	Chr2:57481-57528	supF Stat 9.0
YBR169C	Chr2:575258-575316	supF Stat 3.0
YBR172C	Chr2:580333-580387	supF Stat 3.0
YBR179C	Chr2:587836-587890	supF Stat 3.0
YBR180W	Chr2:591208-591258	supF Stat 3.0
YBR195C	Chr2:611768-611822	supF Stat 3.0
YBR198C	Chr2:617090-617148	supF Stat 3.0
YBR203W	Chr2:629717-629775	supF Stat 3.0
YBR207W	Chr2:635576-635634	supF Stat 3.0
YBR208C	Chr2:638668-638712	supF Stat 9.0
YBR208C	Chr2:638884-638930	supF Stat 9.0
YBR208C	Chr2:639776-639820	supF Stat 9.0
YBR212W	Chr2:649183-649227	supF Stat 9.0
YBL085W	Chr2:64956-65012	supF Stat 3.0
YBR214W	Chr2:652208-652253	supF Stat 3.0
YBR218C	Chr2:660528-660580	supF Stat 9.0
YBR218C	Chr2:660929-660982	supF Stat 9.0
YBL085W	Chr2:66529-66591	supF Stat 3.0
YBR225W	Chr2:673170-673228	supF Stat 3.0
YBR229C	Chr2:677656-677720	supF Stat 3.0
YBR234C	Chr2:686028-686072	supF Stat 3.0
YBR235W	Chr2:688134-688192	supF Stat 9.0
YBR235W	Chr2:689395-689452	supF Stat 9.0
YBR237W	Chr2:693714-693773	supF Stat 3.0
YBR239C	Chr2:698464-698526	supF Stat 3.0
YBR239C	Chr2:699154-699207	supF Stat 3.0
YBR245C	Chr2:709639-709690	supF Stat 9.0
YBR260C	Chr2:734100-734144	supF Stat 3.0
YBR263W	Chr2:736808-736852	supF Stat 9.0
YBR267W	Chr2:740485-740535	supF Stat 3.0
YBR275C	Chr2:753787-753845	supF Stat 9.0
YBR280C	Chr2:763434-763486	supF Stat 3.0
YBL079W	Chr2:76923-76968	supF Stat 9.0
YBR289W	Chr2:781491-781544	supF Stat 3.0
YBR295W	Chr2:793209-793259	supF Stat 9.0
YBR295W	Chr2:794703-794760	supF Stat 9.0
YBR295W	Chr2:795019-795063	supF Stat 9.0
YBR296C	Chr2:798326-798375	supF Stat 3.0
YBL076C	Chr2:82703-82755	supF Stat 9.0
YBL076C	Chr2:83554-83598	supF Stat 9.0
YBL066C	Chr2:96963-97007	supF Stat 9.0
YBL066C	Chr2:99527-99580	supF Stat 9.0
YCL014W	Chr3:100143-100199	supF Stat 9.0
YCR011C	Chr3:136432-136489	supF Stat 3.0
YCR017C	Chr3:146844-146894	supF Stat 3.0
YCR030C	Chr3:175362-175416	supF Stat 9.0
YCR032W	Chr3:181994-182057	supF Stat 9.0
YCR032W	Chr3:183517-183573	supF Stat 9.0
YCR032W	Chr3:184734-184785	supF Stat 9.0
YCR033W	Chr3:187743-187800	supF Stat 9.0
YCR033W	Chr3:188796-188841	supF Stat 9.0
YCR037C	Chr3:195650-195706	supF Stat 3.0
YCR045C	Chr3:208941-208985	supF Stat 3.0
YCR048W	Chr3:213170-213214	supF Stat 9.0
YCL061C	Chr3:21451-21508	supF Stat 9.0
YCL061C	Chr3:21875-21933	supF Stat 9.0
YCR067C	Chr3:233587-233639	supF Stat 9.0
YCR067C	Chr3:234911-234964	supF Stat 9.0
YCR068W	Chr3:238021-238065	supF Stat 9.0
YCL058C	Chr3:23840-23897	supF Stat 3.0
YCR072C	Chr3:240889-240943	supF Stat 3.0
YCR073C	Chr3:244485-244534	supF Stat 3.0
YCR073C	Chr3:245802-245849	supF Stat 3.0
YCR073C	Chr3:246352-246402	supF Stat 3.0
YCR081W	Chr3:254890-254946	supF Stat 3.0
YCR081W	Chr3:256554-256616	supF Stat 3.0
YCR084C	Chr3:260601-260664	supF Stat 3.0
YCR087W	Chr3:264395-264452	supF Stat 3.0
YCR088W	Chr3:265185-265237	supF Stat 3.0
YCR088W	Chr3:266346-266395	supF Stat 3.0
YCR089W	Chr3:268621-268666	supF Stat 9.0
YCR089W	Chr3:270002-270046	supF Stat 9.0
YCR089W	Chr3:270456-270507	supF Stat 9.0
YCR089W	Chr3:270821-270872	supF Stat 9.0
YCR091W	Chr3:275669-275722	supF Stat 3.0
YCR092C	Chr3:277549-277609	supF Stat 3.0
YCR093W	Chr3:282153-282197	supF Stat 3.0
YCR106W	Chr3:312076-312132	supF Stat 3.0
YCL042W	Chr3:50802-50861	supF Stat 3.0
YCL039W	Chr3:53983-54027	supF Stat 3.0
YCL037C	Chr3:57956-58006	supF Stat 9.0
YCL030C	Chr3:67216-67260	supF Stat 3.0
YCL025C	Chr3:76952-77009	supF Stat 3.0
YCL024W	Chr3:79418-79468	supF Stat 9.0
YCL024W	Chr3:80373-80417	supF Stat 9.0
YCL014W	Chr3:99668-99732	supF Stat 9.0
YDR270W	Chr4:1006962-1007019	supF Stat 9.0
YDR270W	Chr4:1007639-1007696	supF Stat 9.0
YDR283C	Chr4:1026355-1026411	supF Stat 3.0
YDR283C	Chr4:1029061-1029119	supF Stat 3.0
YDR291W	Chr4:1041366-1041423	supF Stat 9.0
YDR293C	Chr4:1046615-1046664	supF Stat 9.0
YDR293C	Chr4:1047654-1047710	supF Stat 9.0
YDR295C	Chr4:1053475-1053526	supF Stat 3.0
YDL197C	Chr4:105515-105571	supF Stat 3.0
YDR310C	Chr4:1083539-1083592	supF Stat 3.0
YDR312W	Chr4:1087770-1087828	supF Stat 9.0
YDR312W	Chr4:1088335-1088393	supF Stat 9.0
YDL195W	Chr4:109406-109456	supF Stat 9.0
YDL195W	Chr4:110036-110088	supF Stat 9.0
YDL194W	Chr4:111667-111725	supF Stat 3.0
YDR325W	Chr4:1118993-1119056	supF Stat 3.0
YDR325W	Chr4:1119830-1119892	supF Stat 3.0
YDR326C	Chr4:1122040-1122094	supF Stat 3.0
YDL194W	Chr4:113020-113064	supF Stat 3.0
YDR334W	Chr4:1139488-1139546	supF Stat 3.0
YDR335W	Chr4:1143251-1143309	supF Stat 3.0
YDR338C	Chr4:1148240-1148293	supF Stat 9.0
YDR349C	Chr4:1173266-1173322	supF Stat 3.0
YDR356W	Chr4:1188611-1188655	supF Stat 3.0
YDL190C	Chr4:119105-119170	supF Stat 9.0
YDR362C	Chr4:1197519-1197563	supF Stat 9.0
YDL190C	Chr4:119872-119923	supF Stat 9.0
YDL190C	Chr4:120649-120706	supF Stat 9.0
YDR369C	Chr4:1215888-1215945	supF Stat 3.0
YDR369C	Chr4:1216469-1216525	supF Stat 3.0
YDR379W	Chr4:1231753-1231812	supF Stat 3.0
YDR380W	Chr4:1234726-1234775	supF Stat 3.0
YDR386W	Chr4:1247233-1247287	supF Stat 3.0
YDR387C	Chr4:1249067-1249123	supF Stat 3.0
YDR395W	Chr4:1264041-1264085	supF Stat 3.0
YDR406W	Chr4:1279440-1279484	supF Stat 9.0
YDR406W	Chr4:1281150-1281206	supF Stat 9.0
YDR406W	Chr4:1282556-1282612	supF Stat 9.0
YDR407C	Chr4:1286468-1286512	supF Stat 3.0
YDL185W	Chr4:128786-128835	supF Stat 9.0
YDR409W	Chr4:1290231-1290291	supF Stat 9.0
YDR409W	Chr4:1291180-1291234	supF Stat 9.0
YDR409W	Chr4:1291805-1291849	supF Stat 9.0
YDR416W	Chr4:1298795-1298857	supF Stat 3.0
YDR416W	Chr4:1300274-1300339	supF Stat 3.0
YDR419W	Chr4:1303459-1303506	supF Stat 3.0
YDR419W	Chr4:1303882-1303942	supF Stat 3.0
YDR419W	Chr4:1304135-1304184	supF Stat 3.0
YDR419W	Chr4:1304704-1304756	supF Stat 3.0
YDR420W	Chr4:1306651-1306695	supF Stat 9.0
YDR420W	Chr4:1308557-1308601	supF Stat 9.0
YDR420W	Chr4:1310165-1310218	supF Stat 9.0
YDR420W	Chr4:1311305-1311361	supF Stat 9.0
YDR421W	Chr4:1312507-1312556	supF Stat 3.0
YDR421W	Chr4:1314239-1314289	supF Stat 3.0
YDR430C	Chr4:1326381-1326433	supF Stat 3.0
YDR432W	Chr4:1329647-1329691	supF Stat 3.0
YDR436W	Chr4:1335094-1335143	supF Stat 3.0
YDR436W	Chr4:1336086-1336144	supF Stat 3.0
YDR438W	Chr4:1339135-1339186	supF Stat 3.0
YDR443C	Chr4:1346541-1346591	supF Stat 9.0
YDR443C	Chr4:1347914-1347958	supF Stat 9.0
YDR443C	Chr4:1348911-1348960	supF Stat 9.0
YDR447C	Chr4:1355374-1355432	supF Stat 3.0
YDR452W	Chr4:1363073-1363122	supF Stat 3.0
YDR457W	Chr4:1371559-1371611	supF Stat 9.0
YDR457W	Chr4:1374558-1374609	supF Stat 9.0
YDR457W	Chr4:1375631-1375697	supF Stat 9.0
YDR457W	Chr4:1377141-1377201	supF Stat 9.0
YDR457W	Chr4:1378503-1378553	supF Stat 9.0
YDR464W	Chr4:1391013-1391070	supF Stat 9.0
YDR464W	Chr4:1392936-1392990	supF Stat 9.0
YDR466W	Chr4:1396342-1396392	supF Stat 3.0
YDR466W	Chr4:1397117-1397164	supF Stat 3.0
YDR475C	Chr4:1409048-1409098	supF Stat 9.0
YDR480W	Chr4:1417994-1418050	supF Stat 3.0
YDR485C	Chr4:1425892-1425950	supF Stat 9.0
YDR485C	Chr4:1426078-1426134	supF Stat 9.0
YDR495C	Chr4:1439911-1439965	supF Stat 3.0
YDR495C	Chr4:1440344-1440407	supF Stat 3.0
YDR497C	Chr4:1444590-1444634	supF Stat 3.0
YDR501W	Chr4:1452521-1452578	supF Stat 3.0
YDR505C	Chr4:1458194-1458238	supF Stat 3.0
YDR507C	Chr4:1463691-1463741	supF Stat 9.0
YDL174C	Chr4:146413-146470	supF Stat 3.0
YDR507C	Chr4:1465136-1465193	supF Stat 9.0
YDR508C	Chr4:1467131-1467175	supF Stat 3.0
YDR508C	Chr4:1468008-1468070	supF Stat 3.0
YDR520C	Chr4:1481685-1481750	supF Stat 9.0
YDL171C	Chr4:149615-149666	supF Stat 9.0
YDR534C	Chr4:1503583-1503627	supF Stat 3.0
YDR534C	Chr4:1503998-1504042	supF Stat 3.0
YDR536W	Chr4:1509038-1509095	supF Stat 3.0
YDL171C	Chr4:151216-151265	supF Stat 9.0
YDL171C	Chr4:152377-152426	supF Stat 9.0
YDL171C	Chr4:153556-153608	supF Stat 9.0
YDL171C	Chr4:155259-155308	supF Stat 9.0
YDL164C	Chr4:166339-166399	supF Stat 3.0
YDL160C	Chr4:171332-171395	supF Stat 3.0
YDL154W	Chr4:179882-179938	supF Stat 9.0
YDL154W	Chr4:180238-180296	supF Stat 9.0
YDL149W	Chr4:185958-186002	supF Stat 9.0
YDL145C	Chr4:195263-195307	supF Stat 9.0
YDL145C	Chr4:196765-196817	supF Stat 9.0
YDL145C	Chr4:197804-197854	supF Stat 9.0
YDL141W	Chr4:203980-204037	supF Stat 3.0
YDL140C	Chr4:206478-206535	supF Stat 9.0
YDL139C	Chr4:211552-211609	supF Stat 3.0
YDL139C	Chr4:211873-211930	supF Stat 3.0
YDL138W	Chr4:213609-213653	supF Stat 3.0
YDL126C	Chr4:237415-237461	supF Stat 3.0
YDL125C	Chr4:239375-239429	supF Stat 3.0
YDL117W	Chr4:249935-249984	supF Stat 9.0
YDL117W	Chr4:250790-250839	supF Stat 9.0
YDL112W	Chr4:261887-261931	supF Stat 9.0
YDL109C	Chr4:266602-266649	supF Stat 3.0
YDL239C	Chr4:27819-27871	supF Stat 3.0
YDL102W	Chr4:278950-279008	supF Stat 9.0
YDL095W	Chr4:287673-287717	supF Stat 3.0
YDL085W	Chr4:303754-303808	supF Stat 3.0
YDL080C	Chr4:311068-311124	supF Stat 9.0
YDL079C	Chr4:313890-313948	supF Stat 3.0
YDL077C	Chr4:318916-318978	supF Stat 3.0
YDL058W	Chr4:345746-345790	supF Stat 9.0
YDL058W	Chr4:348471-348528	supF Stat 9.0
YDL058W	Chr4:350059-350103	supF Stat 9.0
YDL048C	Chr4:367682-367726	supF Stat 3.0
YDL044C	Chr4:374618-374668	supF Stat 3.0
YDL040C	Chr4:380074-380125	supF Stat 3.0
YDL038C	Chr4:382758-382808	supF Stat 9.0
YDL038C	Chr4:383337-383388	supF Stat 9.0
YDL035C	Chr4:390642-390704	supF Stat 3.0
YDL031W	Chr4:396393-396452	supF Stat 9.0
YDL030W	Chr4:398575-398638	supF Stat 3.0
YDL231C	Chr4:40909-40959	supF Stat 9.0
YDL019C	Chr4:418463-418512	supF Stat 9.0
YDL019C	Chr4:419515-419571	supF Stat 9.0
YDL019C	Chr4:420379-420423	supF Stat 9.0
YDL003W	Chr4:445862-445911	supF Stat 3.0
YDR001C	Chr4:451021-451066	supF Stat 3.0
YDR006C	Chr4:459317-459367	supF Stat 3.0
YDR011W	Chr4:466442-466487	supF Stat 3.0
YDR011W	Chr4:467442-467498	supF Stat 3.0
YDR011W	Chr4:468276-468332	supF Stat 3.0
YDR011W	Chr4:469195-469255	supF Stat 3.0
YDR028C	Chr4:498652-498717	supF Stat 3.0
YDR030C	Chr4:502687-502744	supF Stat 9.0
YDL225W	Chr4:53000-53050	supF Stat 3.0
YDR046C	Chr4:549959-550017	supF Stat 3.0
YDR049W	Chr4:554434-554486	supF Stat 3.0
YDL223C	Chr4:58073-58130	supF Stat 3.0
YDR069C	Chr4:586820-586877	supF Stat 3.0
YDR074W	Chr4:594080-594124	supF Stat 9.0
YDR074W	Chr4:594929-594981	supF Stat 9.0
YDR074W	Chr4:595856-595913	supF Stat 9.0
YDL223C	Chr4:59592-59636	supF Stat 3.0
YDR081C	Chr4:607619-607673	supF Stat 3.0
YDR089W	Chr4:623819-623878	supF Stat 3.0
YDR093W	Chr4:631616-631660	supF Stat 9.0
YDR093W	Chr4:634116-634166	supF Stat 9.0
YDR093W	Chr4:634783-634827	supF Stat 9.0
YDR096W	Chr4:638427-638477	supF Stat 3.0
YDR104C	Chr4:662736-662793	supF Stat 9.0
YDR107C	Chr4:669501-669551	supF Stat 3.0
YDL218W	Chr4:67145-67189	supF Stat 3.0
YDR108W	Chr4:672900-672950	supF Stat 9.0
YDR109C	Chr4:675451-675508	supF Stat 9.0
YDR110W	Chr4:676498-676562	supF Stat 3.0
YDR122W	Chr4:696029-696087	supF Stat 9.0
YDR122W	Chr4:696772-696821	supF Stat 9.0
YDR123C	Chr4:699257-699301	supF Stat 3.0
YDR127W	Chr4:706192-706249	supF Stat 9.0
YDR127W	Chr4:708684-708737	supF Stat 9.0
YDR128W	Chr4:711150-711194	supF Stat 9.0
YDR128W	Chr4:711670-711720	supF Stat 9.0
YDR135C	Chr4:725189-725245	supF Stat 3.0
YDL215C	Chr4:72988-73045	supF Stat 3.0
YDR141C	Chr4:737230-737287	supF Stat 3.0
YDR143C	Chr4:743442-743505	supF Stat 3.0
YDR150W	Chr4:760415-760467	supF Stat 9.0
YDR150W	Chr4:762452-762496	supF Stat 9.0
YDR159W	Chr4:774124-774178	supF Stat 9.0
YDR166C	Chr4:787281-787337	supF Stat 3.0
YDR170C	Chr4:797510-797569	supF Stat 9.0
YDR170C	Chr4:799950-800008	supF Stat 9.0
YDR172W	Chr4:808692-808741	supF Stat 3.0
YDR180W	Chr4:822895-822952	supF Stat 3.0
YDR181C	Chr4:826246-826290	supF Stat 9.0
YDR186C	Chr4:834064-834124	supF Stat 3.0
YDR192C	Chr4:844506-844550	supF Stat 3.0
YDR208W	Chr4:868793-868843	supF Stat 9.0
YDR208W	Chr4:869369-869428	supF Stat 9.0
YDL207W	Chr4:88817-88866	supF Stat 3.0
YDR213W	Chr4:890220-890269	supF Stat 3.0
YDR213W	Chr4:891493-891549	supF Stat 3.0
YDR216W	Chr4:896695-896751	supF Stat 3.0
YDR216W	Chr4:897878-897940	supF Stat 3.0
YDR227W	Chr4:918928-918974	supF Stat 9.0
YDR227W	Chr4:920804-920861	supF Stat 9.0
YDR232W	Chr4:928380-928424	supF Stat 3.0
YDR234W	Chr4:931762-931818	supF Stat 3.0
YDR234W	Chr4:932530-932580	supF Stat 3.0
YDR238C	Chr4:939702-939758	supF Stat 3.0
YDL204W	Chr4:94808-94852	supF Stat 3.0
YDR244W	Chr4:950745-950804	supF Stat 3.0
YDR244W	Chr4:951283-951345	supF Stat 3.0
YDR251W	Chr4:962022-962075	supF Stat 3.0
YDL203C	Chr4:96669-96731	supF Stat 3.0
YDR258C	Chr4:972260-972314	supF Stat 3.0
YDR258C	Chr4:973199-973249	supF Stat 3.0
YEL025C	Chr5:103195-103244	supF Stat 3.0
YEL025C	Chr5:104299-104358	supF Stat 3.0
YEL022W	Chr5:112917-112966	supF Stat 9.0
YEL020C	Chr5:120087-120143	supF Stat 3.0
YEL015W	Chr5:127562-127609	supF Stat 3.0
YEL011W	Chr5:133261-133320	supF Stat 9.0
YEL011W	Chr5:133798-133863	supF Stat 9.0
YER001W	Chr5:153913-153975	supF Stat 3.0
YER005W	Chr5:161467-161520	supF Stat 3.0
YER008C	Chr5:168595-168652	supF Stat 3.0
YER008C	Chr5:170990-171035	supF Stat 3.0
YER013W	Chr5:180540-180600	supF Stat 9.0
YER019W	Chr5:192943-192999	supF Stat 9.0
YEL077C	Chr5:2106-2156	supF Stat 3.0
YER033C	Chr5:219821-219871	supF Stat 9.0
YER041W	Chr5:233928-233984	supF Stat 3.0
YER047C	Chr5:244265-244309	supF Stat 3.0
YER047C	Chr5:245279-245333	supF Stat 3.0
YER051W	Chr5:255097-255155	supF Stat 3.0
YER052C	Chr5:257605-257661	supF Stat 3.0
YER054C	Chr5:262255-262308	supF Stat 3.0
YER056C	Chr5:267460-267504	supF Stat 3.0
YER060W-A	Chr5:277599-277645	supF Stat 3.0
YER070W	Chr5:299582-299631	supF Stat 9.0
YER070W	Chr5:300438-300488	supF Stat 9.0
YER075C	Chr5:310625-310683	supF Stat 9.0
YER075C	Chr5:311037-311090	supF Stat 9.0
YER088C	Chr5:334070-334127	supF Stat 9.0
YER088C	Chr5:334869-334919	supF Stat 9.0
YER093C	Chr5:345100-345154	supF Stat 9.0
YER093C	Chr5:346151-346208	supF Stat 9.0
YER096W	Chr5:352159-352211	supF Stat 3.0
YER098W	Chr5:356801-356863	supF Stat 9.0
YER103W	Chr5:365360-365404	supF Stat 3.0
YER105C	Chr5:369674-369719	supF Stat 3.0
YER105C	Chr5:370869-370918	supF Stat 3.0
YER109C	Chr5:375726-375778	supF Stat 3.0
YER109C	Chr5:376180-376224	supF Stat 3.0
YER109C	Chr5:376897-376954	supF Stat 3.0
YER110C	Chr5:380512-380570	supF Stat 3.0
YER114C	Chr5:391152-391203	supF Stat 3.0
YER125W	Chr5:411833-411889	supF Stat 3.0
YER127W	Chr5:414609-414655	supF Stat 3.0
YER129W	Chr5:419155-419199	supF Stat 9.0
YER144C	Chr5:459648-459705	supF Stat 3.0
YER145C	Chr5:461059-461110	supF Stat 3.0
YER147C	Chr5:463313-463357	supF Stat 3.0
YER147C	Chr5:464061-464114	supF Stat 3.0
YER147C	Chr5:464467-464518	supF Stat 3.0
YER155C	Chr5:480006-480064	supF Stat 9.0
YER155C	Chr5:481842-481894	supF Stat 9.0
YER158C	Chr5:489674-489733	supF Stat 3.0
YEL055C	Chr5:49549-49606	supF Stat 3.0
YER162C	Chr5:501281-501337	supF Stat 9.0
YER162C	Chr5:502534-502591	supF Stat 9.0
YER164W	Chr5:507064-507120	supF Stat 9.0
YER164W	Chr5:508841-508898	supF Stat 9.0
YER165W	Chr5:510894-510943	supF Stat 3.0
YER166W	Chr5:514201-514260	supF Stat 9.0
YER166W	Chr5:515346-515408	supF Stat 9.0
YER166W	Chr5:517078-517134	supF Stat 9.0
YER167W	Chr5:519449-519499	supF Stat 3.0
YER169W	Chr5:524635-524694	supF Stat 3.0
YER171W	Chr5:528351-528408	supF Stat 3.0
YER173W	Chr5:537872-537916	supF Stat 3.0
YER176W	Chr5:541959-542011	supF Stat 3.0
YER176W	Chr5:542390-542446	supF Stat 3.0
YER176W	Chr5:543264-543313	supF Stat 3.0
YER184C	Chr5:556781-556833	supF Stat 3.0
YEL043W	Chr5:71405-71454	supF Stat 9.0
YEL043W	Chr5:72138-72191	supF Stat 9.0
YEL036C	Chr5:83665-83709	supF Stat 3.0
YEL032W	Chr5:88111-88170	supF Stat 9.0
YEL032W	Chr5:88261-88305	supF Stat 9.0
YEL031W	Chr5:91379-91435	supF Stat 9.0
YEL031W	Chr5:92406-92462	supF Stat 9.0
YEL030W	Chr5:95681-95737	supF Stat 3.0
YFL016C	Chr6:105167-105224	supF Stat 3.0
YFL014W	Chr6:107437-107481	supF Stat 3.0
YFL009W	Chr6:117273-117331	supF Stat 3.0
YFL008W	Chr6:119685-119738	supF Stat 3.0
YFL008W	Chr6:122391-122441	supF Stat 3.0
YFL007W	Chr6:126685-126742	supF Stat 9.0
YFL007W	Chr6:127627-127689	supF Stat 9.0
YFL007W	Chr6:128923-128981	supF Stat 9.0
YFR006W	Chr6:156511-156573	supF Stat 3.0
YFR015C	Chr6:175472-175528	supF Stat 9.0
YFR015C	Chr6:176154-176211	supF Stat 9.0
YFR016C	Chr6:177781-177839	supF Stat 9.0
YFR016C	Chr6:178507-178561	supF Stat 9.0
YFR017C	Chr6:182686-182730	supF Stat 3.0
YFR019W	Chr6:185517-185561	supF Stat 9.0
YFR019W	Chr6:187858-187917	supF Stat 9.0
YFR019W	Chr6:189653-189697	supF Stat 9.0
YFR020W	Chr6:193111-193168	supF Stat 3.0
YFR022W	Chr6:197688-197745	supF Stat 3.0
YFL054C	Chr6:21016-21069	supF Stat 9.0
YFR029W	Chr6:211922-211971	supF Stat 9.0
YFR030W	Chr6:213406-213457	supF Stat 9.0
YFR030W	Chr6:215596-215653	supF Stat 9.0
YFL054C	Chr6:21623-21675	supF Stat 9.0
YFR031C	Chr6:218702-218758	supF Stat 9.0
YFR034C	Chr6:225748-225798	supF Stat 3.0
YFR040W	Chr6:234667-234723	supF Stat 3.0
YFR040W	Chr6:235915-235974	supF Stat 3.0
YFL053W	Chr6:24343-24401	supF Stat 3.0
YFL050C	Chr6:33996-34046	supF Stat 3.0
YFL050C	Chr6:35276-35327	supF Stat 3.0
YFL049W	Chr6:37841-37897	supF Stat 3.0
YFL042C	Chr6:46175-46219	supF Stat 9.0
YFL042C	Chr6:46438-46495	supF Stat 9.0
YFL042C	Chr6:47003-47059	supF Stat 9.0
YFL041W	Chr6:49937-50001	supF Stat 3.0
YFL041W	Chr6:50387-50440	supF Stat 3.0
YFL038C	Chr6:55604-55662	supF Stat 3.0
YFL036W	Chr6:60042-60086	supF Stat 3.0
YFL036W	Chr6:61669-61720	supF Stat 3.0
YFL034W	Chr6:67023-67086	supF Stat 9.0
YFL034W	Chr6:67253-67297	supF Stat 9.0
YFL034W	Chr6:67825-67881	supF Stat 9.0
YFL033C	Chr6:72126-72183	supF Stat 9.0
YFL033C	Chr6:73845-73890	supF Stat 9.0
YFL026W	Chr6:83035-83091	supF Stat 3.0
YFL025C	Chr6:85810-85868	supF Stat 3.0
YFL024C	Chr6:89848-89899	supF Stat 3.0
YFL023W	Chr6:92187-92247	supF Stat 3.0
YGL207W	Chr7:100421-100465	supF Stat 3.0
YGR256W	Chr7:1005386-1005440	supF Stat 9.0
YGR258C	Chr7:1008330-1008386	supF Stat 9.0
YGR258C	Chr7:1010320-1010364	supF Stat 9.0
YGR270W	Chr7:1028562-1028621	supF Stat 3.0
YGR270W	Chr7:1029753-1029797	supF Stat 3.0
YGL206C	Chr7:102986-103044	supF Stat 9.0
YGR271W	Chr7:1032858-1032907	supF Stat 9.0
YGR271W	Chr7:1033959-1034010	supF Stat 9.0
YGR271W	Chr7:1035298-1035354	supF Stat 9.0
YGR271W	Chr7:1036389-1036445	supF Stat 9.0
YGR274C	Chr7:1042987-1043031	supF Stat 3.0
YGL206C	Chr7:104854-104910	supF Stat 9.0
YGR281W	Chr7:1053592-1053649	supF Stat 9.0
YGR281W	Chr7:1055268-1055312	supF Stat 9.0
YGR289C	Chr7:1074790-1074847	supF Stat 9.0
YGR289C	Chr7:1075154-1075211	supF Stat 9.0
YGL203C	Chr7:113101-113152	supF Stat 3.0
YGL201C	Chr7:118436-118500	supF Stat 9.0
YGL201C	Chr7:119474-119527	supF Stat 9.0
YGL197W	Chr7:125863-125914	supF Stat 9.0
YGL197W	Chr7:126280-126330	supF Stat 9.0
YGL197W	Chr7:127277-127329	supF Stat 9.0
YGL197W	Chr7:128303-128360	supF Stat 9.0
YGL195W	Chr7:135397-135453	supF Stat 9.0
YGL195W	Chr7:136784-136838	supF Stat 9.0
YGL195W	Chr7:138104-138148	supF Stat 9.0
YGL194C	Chr7:141411-141462	supF Stat 3.0
YGL178W	Chr7:167783-167843	supF Stat 3.0
YGL178W	Chr7:169761-169819	supF Stat 3.0
YGL173C	Chr7:176643-176694	supF Stat 9.0
YGL173C	Chr7:177615-177672	supF Stat 9.0
YGL163C	Chr7:194655-194712	supF Stat 9.0
YGL163C	Chr7:195717-195762	supF Stat 9.0
YGL160W	Chr7:201542-201586	supF Stat 3.0
YGL150C	Chr7:221801-221858	supF Stat 3.0
YGL150C	Chr7:223955-224006	supF Stat 3.0
YGL150C	Chr7:225259-225321	supF Stat 3.0
YGL144C	Chr7:232734-232796	supF Stat 3.0
YGL144C	Chr7:233070-233129	supF Stat 3.0
YGL144C	Chr7:233642-233695	supF Stat 3.0
YGL142C	Chr7:236915-236969	supF Stat 9.0
YGL141W	Chr7:239417-239474	supF Stat 9.0
YGL141W	Chr7:239989-240033	supF Stat 9.0
YGL140C	Chr7:242171-242216	supF Stat 9.0
YGL140C	Chr7:243744-243793	supF Stat 9.0
YGL139W	Chr7:247525-247581	supF Stat 9.0
YGL137W	Chr7:250112-250163	supF Stat 9.0
YGL137W	Chr7:250607-250664	supF Stat 9.0
YGL137W	Chr7:251126-251176	supF Stat 9.0
YGL137W	Chr7:252259-252316	supF Stat 9.0
YGL133W	Chr7:258761-258808	supF Stat 9.0
YGL133W	Chr7:259895-259944	supF Stat 9.0
YGL133W	Chr7:260430-260484	supF Stat 9.0
YGL131C	Chr7:262311-262371	supF Stat 3.0
YGL131C	Chr7:263644-263695	supF Stat 3.0
YGL131C	Chr7:264790-264835	supF Stat 3.0
YGL122C	Chr7:279637-279691	supF Stat 3.0
YGL120C	Chr7:283306-283356	supF Stat 3.0
YGL251C	Chr7:28411-28456	supF Stat 3.0
YGL114W	Chr7:294441-294485	supF Stat 9.0
YGL114W	Chr7:294686-294744	supF Stat 9.0
YGL094C	Chr7:332781-332832	supF Stat 3.0
YGL093W	Chr7:337235-337297	supF Stat 3.0
YGL092W	Chr7:339464-339520	supF Stat 9.0
YGL083W	Chr7:354745-354802	supF Stat 3.0
YGL073W	Chr7:369880-369924	supF Stat 3.0
YGL071W	Chr7:372915-372977	supF Stat 3.0
YGL066W	Chr7:379118-379169	supF Stat 3.0
YGL063W	Chr7:384130-384174	supF Stat 3.0
YGL062W	Chr7:387070-387120	supF Stat 9.0
YGL060W	Chr7:391285-391335	supF Stat 3.0
YGL049C	Chr7:408429-408486	supF Stat 3.0
YGL045W	Chr7:414818-414872	supF Stat 9.0
YGL045W	Chr7:415271-415322	supF Stat 9.0
YGL036W	Chr7:430705-430767	supF Stat 3.0
YGL035C	Chr7:432123-432179	supF Stat 3.0
YGL035C	Chr7:432893-432943	supF Stat 3.0
YGL243W	Chr7:43531-43582	supF Stat 3.0
YGL027C	Chr7:444717-444773	supF Stat 3.0
YGL026C	Chr7:447026-447076	supF Stat 3.0
YGL023C	Chr7:450701-450751	supF Stat 9.0
YGL022W	Chr7:453215-453259	supF Stat 3.0
YGL014W	Chr7:466702-466752	supF Stat 3.0
YGL013C	Chr7:470537-470581	supF Stat 9.0
YGL008C	Chr7:481135-481179	supF Stat 9.0
YGL008C	Chr7:482458-482502	supF Stat 9.0
YGL006W	Chr7:487761-487812	supF Stat 9.0
YGL006W	Chr7:489173-489227	supF Stat 9.0
YGL240W	Chr7:49165-49214	supF Stat 3.0
YGR002C	Chr7:498924-498980	supF Stat 3.0
YGR013W	Chr7:515507-515559	supF Stat 9.0
YGR014W	Chr7:518029-518073	supF Stat 9.0
YGR014W	Chr7:519248-519301	supF Stat 9.0
YGR019W	Chr7:526072-526132	supF Stat 3.0
YGR023W	Chr7:530104-530166	supF Stat 3.0
YGR032W	Chr7:548683-548732	supF Stat 9.0
YGR032W	Chr7:551718-551776	supF Stat 9.0
YGR032W	Chr7:553243-553287	supF Stat 9.0
YGL236C	Chr7:55684-55730	supF Stat 3.0
YGL234W	Chr7:56891-56940	supF Stat 3.0
YGL234W	Chr7:57482-57532	supF Stat 3.0
YGR047C	Chr7:588061-588125	supF Stat 9.0
YGR056W	Chr7:602887-602938	supF Stat 3.0
YGR058W	Chr7:606381-606440	supF Stat 3.0
YGR061C	Chr7:612832-612890	supF Stat 9.0
YGR061C	Chr7:613842-613902	supF Stat 9.0
YGR079W	Chr7:640825-640869	supF Stat 3.0
YGL229C	Chr7:65612-65674	supF Stat 3.0
YGR090W	Chr7:664795-664852	supF Stat 3.0
YGR092W	Chr7:669266-669319	supF Stat 3.0
YGR094W	Chr7:673567-673611	supF Stat 9.0
YGR097W	Chr7:679808-679865	supF Stat 9.0
YGR097W	Chr7:681114-681170	supF Stat 9.0
YGR097W	Chr7:681589-681651	supF Stat 9.0
YGR098C	Chr7:683335-683392	supF Stat 9.0
YGR098C	Chr7:685162-685222	supF Stat 9.0
YGR100W	Chr7:691987-692037	supF Stat 9.0
YGR100W	Chr7:692787-692831	supF Stat 9.0
YGR121C	Chr7:731711-731755	supF Stat 3.0
YGR121C	Chr7:732429-732473	supF Stat 3.0
YGR125W	Chr7:743044-743103	supF Stat 3.0
YGR130C	Chr7:752727-752771	supF Stat 3.0
YGR134W	Chr7:759219-759269	supF Stat 9.0
YGR138C	Chr7:764810-764867	supF Stat 3.0
YGR138C	Chr7:765134-765187	supF Stat 3.0
YGR141W	Chr7:771266-771320	supF Stat 3.0
YGR143W	Chr7:776147-776209	supF Stat 3.0
YGR144W	Chr7:780816-780867	supF Stat 9.0
YGR145W	Chr7:783298-783342	supF Stat 3.0
YGR156W	Chr7:801506-801550	supF Stat 3.0
YGR161C	Chr7:808977-809021	supF Stat 3.0
YGR162W	Chr7:825465-825509	supF Stat 3.0
YGR162W	Chr7:826434-826490	supF Stat 3.0
YGR184C	Chr7:864032-864092	supF Stat 9.0
YGL216W	Chr7:86521-86565	supF Stat 9.0
YGR186W	Chr7:868165-868215	supF Stat 3.0
YGR186W	Chr7:869168-869230	supF Stat 3.0
YGR188C	Chr7:872898-872947	supF Stat 9.0
YGR188C	Chr7:873627-873684	supF Stat 9.0
YGR189C	Chr7:877438-877491	supF Stat 3.0
YGR189C	Chr7:877933-877978	supF Stat 3.0
YGL215W	Chr7:88823-88875	supF Stat 3.0
YGR196C	Chr7:890253-890303	supF Stat 9.0
YGR196C	Chr7:891024-891080	supF Stat 9.0
YGR204W	Chr7:907297-907341	supF Stat 9.0
YGR216C	Chr7:923523-923575	supF Stat 3.0
YGR217W	Chr7:924990-925035	supF Stat 9.0
YGR217W	Chr7:926036-926094	supF Stat 9.0
YGR217W	Chr7:928203-928247	supF Stat 9.0
YGR218W	Chr7:933687-933738	supF Stat 3.0
YGL209W	Chr7:96312-96361	supF Stat 3.0
YGR237C	Chr7:963727-963783	supF Stat 3.0
YGR238C	Chr7:967058-967114	supF Stat 9.0
YGR239C	Chr7:969889-969948	supF Stat 3.0
YGR240C	Chr7:972775-972824	supF Stat 3.0
YGR240C	Chr7:972997-973051	supF Stat 3.0
YGR246C	Chr7:983488-983538	supF Stat 9.0
YHR023W	Chr8:153740-153798	supF Stat 3.0
YHR027C	Chr8:162943-163000	supF Stat 3.0
YHR031C	Chr8:172730-172774	supF Stat 3.0
YHR033W	Chr8:175865-175912	supF Stat 3.0
YHR040W	Chr8:188914-188958	supF Stat 3.0
YHR041C	Chr8:189787-189831	supF Stat 3.0
YHR042W	Chr8:190801-190847	supF Stat 3.0
YHR042W	Chr8:191836-191890	supF Stat 3.0
YHR044C	Chr8:194312-194356	supF Stat 3.0
YHL040C	Chr8:20626-20684	supF Stat 3.0
YHL040C	Chr8:20795-20852	supF Stat 3.0
YHR062C	Chr8:223681-223732	supF Stat 3.0
YHR072W	Chr8:240094-240139	supF Stat 3.0
YHR073W	Chr8:243458-243502	supF Stat 3.0
YHR074W	Chr8:247685-247729	supF Stat 3.0
YHR077C	Chr8:253031-253080	supF Stat 3.0
YHR079C	Chr8:259772-259824	supF Stat 3.0
YHR080C	Chr8:264906-264965	supF Stat 3.0
YHR080C	Chr8:266052-266105	supF Stat 3.0
YHR082C	Chr8:270359-270417	supF Stat 9.0
YHR091C	Chr8:286459-286515	supF Stat 3.0
YHL035C	Chr8:29709-29760	supF Stat 9.0
YHR097C	Chr8:298416-298475	supF Stat 3.0
YHR099W	Chr8:304313-304357	supF Stat 9.0
YHR099W	Chr8:306601-306657	supF Stat 9.0
YHR099W	Chr8:311248-311305	supF Stat 9.0
YHR099W	Chr8:312876-312927	supF Stat 9.0
YHR102W	Chr8:317021-317077	supF Stat 9.0
YHR102W	Chr8:317490-317539	supF Stat 9.0
YHR102W	Chr8:319520-319567	supF Stat 9.0
YHR103W	Chr8:321139-321188	supF Stat 3.0
YHR106W	Chr8:326152-326196	supF Stat 3.0
YHR108W	Chr8:328879-328929	supF Stat 3.0
YHR116W	Chr8:341829-341874	supF Stat 3.0
YHR117W	Chr8:343560-343604	supF Stat 3.0
YHR119W	Chr8:347955-348012	supF Stat 3.0
YHR124W	Chr8:357874-357930	supF Stat 3.0
YHR131C	Chr8:366019-366069	supF Stat 3.0
YHL032C	Chr8:36872-36916	supF Stat 9.0
YHR137W	Chr8:375922-375974	supF Stat 3.0
YHR149C	Chr8:395712-395771	supF Stat 9.0
YHR158C	Chr8:414627-414690	supF Stat 9.0
YHR158C	Chr8:415856-415912	supF Stat 9.0
YHR164C	Chr8:425227-425284	supF Stat 9.0
YHL030W	Chr8:42527-42580	supF Stat 9.0
YHR164C	Chr8:425757-425815	supF Stat 9.0
YHR164C	Chr8:426605-426649	supF Stat 9.0
YHR164C	Chr8:427903-427952	supF Stat 9.0
YHR165C	Chr8:432500-432552	supF Stat 9.0
YHR165C	Chr8:433372-433422	supF Stat 9.0
YHR165C	Chr8:436061-436105	supF Stat 9.0
YHR166C	Chr8:437768-437825	supF Stat 3.0
YHR172W	Chr8:449741-449794	supF Stat 3.0
YHR177W	Chr8:457408-457457	supF Stat 3.0
YHR182W	Chr8:469952-470008	supF Stat 9.0
YHR186C	Chr8:476525-476574	supF Stat 9.0
YHR186C	Chr8:479249-479299	supF Stat 9.0
YHR186C	Chr8:480202-480259	supF Stat 9.0
YHR188C	Chr8:482804-482854	supF Stat 3.0
YHL028W	Chr8:49240-49289	supF Stat 3.0
YHL028W	Chr8:49926-49979	supF Stat 3.0
YHR204W	Chr8:507747-507805	supF Stat 9.0
YHR205W	Chr8:510290-510342	supF Stat 3.0
YHR205W	Chr8:511356-511400	supF Stat 3.0
YHL027W	Chr8:52092-52148	supF Stat 3.0
YHR211W	Chr8:526370-526414	supF Stat 9.0
YHR211W	Chr8:528112-528157	supF Stat 9.0
YHL023C	Chr8:61216-61276	supF Stat 3.0
YHL023C	Chr8:62403-62465	supF Stat 3.0
YHL021C	Chr8:65228-65278	supF Stat 3.0
YHL016C	Chr8:73511-73555	supF Stat 3.0
YIL130W	Chr9:104765-104822	supF Stat 3.0
YIL129C	Chr9:107125-107183	supF Stat 9.0
YIL129C	Chr9:109386-109442	supF Stat 9.0
YIL129C	Chr9:110483-110527	supF Stat 9.0
YIL125W	Chr9:123238-123288	supF Stat 3.0
YIL125W	Chr9:125044-125101	supF Stat 3.0
YIL121W	Chr9:132664-132714	supF Stat 3.0
YIL119C	Chr9:137589-137645	supF Stat 3.0
YIL116W	Chr9:143230-143282	supF Stat 3.0
YIL115C	Chr9:146095-146149	supF Stat 3.0
YIL115C	Chr9:146675-146725	supF Stat 3.0
YIL115C	Chr9:147602-147651	supF Stat 3.0
YIL112W	Chr9:151822-151866	supF Stat 9.0
YIL112W	Chr9:153468-153521	supF Stat 9.0
YIL112W	Chr9:154321-154383	supF Stat 9.0
YIL109C	Chr9:158986-159030	supF Stat 3.0
YIL109C	Chr9:159736-159780	supF Stat 3.0
YIL108W	Chr9:161128-161172	supF Stat 3.0
YIL108W	Chr9:161809-161859	supF Stat 3.0
YIL101C	Chr9:176231-176288	supF Stat 3.0
YIL099W	Chr9:178756-178802	supF Stat 3.0
YIL095W	Chr9:184766-184822	supF Stat 9.0
YIL079C	Chr9:211680-211733	supF Stat 3.0
YIL075C	Chr9:218491-218537	supF Stat 9.0
YIL075C	Chr9:220324-220376	supF Stat 9.0
YIL073C	Chr9:223666-223725	supF Stat 3.0
YIL069C	Chr9:232276-232335	supF Stat 3.0
YIL068C	Chr9:234008-234058	supF Stat 9.0
YIL067C	Chr9:236533-236589	supF Stat 3.0
YIL066C	Chr9:239680-239732	supF Stat 3.0
YIL064W	Chr9:242015-242059	supF Stat 3.0
YIL063C	Chr9:243563-243620	supF Stat 3.0
YIL169C	Chr9:24757-24802	supF Stat 9.0
YIL056W	Chr9:250507-250551	supF Stat 3.0
YIL056W	Chr9:251355-251399	supF Stat 3.0
YIL169C	Chr9:25292-25336	supF Stat 9.0
YIL055C	Chr9:253184-253228	supF Stat 3.0
YIL048W	Chr9:263692-263750	supF Stat 9.0
YIL046W	Chr9:268763-268816	supF Stat 9.0
YIL031W	Chr9:294828-294873	supF Stat 9.0
YIL030C	Chr9:297967-298018	supF Stat 3.0
YIL026C	Chr9:305443-305500	supF Stat 9.0
YIL026C	Chr9:307321-307372	supF Stat 9.0
YIL022W	Chr9:312239-312283	supF Stat 3.0
YIL017C	Chr9:319465-319514	supF Stat 3.0
YIL017C	Chr9:320120-320182	supF Stat 3.0
YIL015W	Chr9:322946-323002	supF Stat 3.0
YIL015W	Chr9:323720-323764	supF Stat 3.0
YIL013C	Chr9:329079-329137	supF Stat 9.0
YIL013C	Chr9:331393-331450	supF Stat 9.0
YIL009W	Chr9:339828-339873	supF Stat 3.0
YIL002C	Chr9:350877-350927	supF Stat 3.0
YIL002C	Chr9:352321-352375	supF Stat 3.0
YIR002C	Chr9:358523-358582	supF Stat 3.0
YIR003W	Chr9:361942-361991	supF Stat 3.0
YIR006C	Chr9:366079-366125	supF Stat 3.0
YIR006C	Chr9:368203-368247	supF Stat 3.0
YIR006C	Chr9:368975-369031	supF Stat 3.0
YIR007W	Chr9:372112-372171	supF Stat 9.0
YIR012W	Chr9:379404-379460	supF Stat 3.0
YIR019C	Chr9:390154-390205	supF Stat 3.0
YIR019C	Chr9:392733-392792	supF Stat 3.0
YIR019C	Chr9:393035-393091	supF Stat 3.0
YIR023W	Chr9:400405-400457	supF Stat 3.0
YIR023W	Chr9:401802-401858	supF Stat 3.0
YIR027C	Chr9:406722-406767	supF Stat 3.0
YIR028W	Chr9:408779-408833	supF Stat 3.0
YIR028W	Chr9:409663-409713	supF Stat 3.0
YIR029W	Chr9:411489-411533	supF Stat 3.0
YIR033W	Chr9:417154-417199	supF Stat 3.0
YIL156W	Chr9:49602-49646	supF Stat 9.0
YIL156W	Chr9:50572-50616	supF Stat 9.0
YIL155C	Chr9:52336-52388	supF Stat 3.0
YIL151C	Chr9:59094-59153	supF Stat 3.0
YIL150C	Chr9:61870-61920	supF Stat 3.0
YIL150C	Chr9:62506-62550	supF Stat 3.0
YIL149C	Chr9:65201-65245	supF Stat 3.0
YIL147C	Chr9:71682-71738	supF Stat 9.0
YIL147C	Chr9:72252-72309	supF Stat 9.0
YIL146C	Chr9:74854-74906	supF Stat 3.0
YIL144W	Chr9:78848-78904	supF Stat 3.0
YIL143C	Chr9:81344-81393	supF Stat 3.0
YIL143C	Chr9:82050-82107	supF Stat 3.0
YIL140W	Chr9:86667-86723	supF Stat 3.0
YIL140W	Chr9:86964-87022	supF Stat 3.0
YIL137C	Chr9:91025-91079	supF Stat 3.0
YIL137C	Chr9:92644-92698	supF Stat 3.0
YIL136W	Chr9:93833-93877	supF Stat 3.0

## Sheet: Table Legends
supF Stat 9.0 (Worksheet)	Genes that pass the conservative supF Stat 9.0 (see Methods)
supF Stat 3.0 (Worksheet)	Genes that pass the liberal supF Stat 3.0 (see Methods)
Systematic Name	Systematic gene name (http://www.yeastgenome.org/)
Standard Name	Standard gene name (http://www.yeastgenome.org/)
Chromosome	Chromosome gene is located on
gstart	Gene start coordinate
gend	Gene end coordinate
gdir	Gene direction
pvalue	pvalue associated with most significant transition (see Methods)
supF Stat	supF Stat associated with most signifigant transition (See Methods)
# of Probes	Number of Probes within open reading frame of gene
# of Transitions	Number of transitions detected
Position (Probe Number)	Position of transitions
Transition Coordinates (Worksheet)
Transition Probe	Coordinates of probe that was called a transition probe
Cutoff	Highest cutoff that transition probe passed (Assigned to genes and in this case not individual probes)
